# Supplementary material for: Weighting by Gene Tree Uncertainty Improves Accuracy of Quartet-based Species Trees
Source: PubMed Central journal article supplement (PMC9750496; doi:10.1093/molbev/msac215), 2022-10-06
Supplement: msac215_supplementary_data.pdf [file msac215_supplementary_data.pdf]

# Supplementary material

## Commands

Approximate Bayesian Branch Support Annotation

```
iqtree2 -s SEQ_ALIGNMENT -te GENE_TREE -m TVM+I+G4 -abayes -pre ANNOTATED_GENE_TREE
```

Note: When inferring support as a post-processing step, the same model used for inferring the tree should be used, a task that requires care when the original trees are inferred using a different tool (e.g., RAxML). TVM+I+G4 is simply an example.

Running wASTRAL

Exact commands when running on gene trees with approximate Bayesian/Bootstrap/SH-like supports.

```
astral-hybrid -x 1 -n 0.333 APPROXIMATE_BAYESIAN_ANNOTATED_GENE_TREE
```

```
astral-hybrid -x 100 -n 0 BOOTSTRAP_ANNOTATED_GENE_TREE
```

```
astral-hybrid -x 1 -n 0 SH_LIKE_ANNOTATED_GENE_TREE
```

**Table S1.** Counters  $w^*$  are defined for each node  $w$  in each gene tree, and  $Q$  is defined globally. Here,  $X, Y, Z$  are distinct colors of  $A, B$ , and  $C$ . Let  $u, v$  be the children of  $w$ ;  $e$  be the parental edge of  $w$ ;  $p$  be the parent of  $w$ ;  $\mathcal{P}_{x,w}$  be the path between  $x$  and  $w$ ;  $s(\mathcal{P}) = 1 - \prod_{\hat{e} \in \mathcal{P}} (1 - s(\hat{e}))$ ;  $m(i, j) = \text{MRCA of } i \text{ and } j$ . Counters for leaves are set to zero unless explicitly noted. For each counter, we show a recursive equation on top and the equivalent non-recursive definition on the bottom.

|                        |                                                                                                                                                                                                                                                                                    |
|------------------------|------------------------------------------------------------------------------------------------------------------------------------------------------------------------------------------------------------------------------------------------------------------------------------|
| $w_X$                  | $(u_X + v_X)e^{-l(e)}$ for internal node $w$ ; $e^{-l(e)}$ for leaf node $w$ colored $X$                                                                                                                                                                                           |
|                        | $\sum_i e^{-l(\mathcal{P}_{i,p})}$ for all leaf nodes $i$ colored $X$ under $w$                                                                                                                                                                                                    |
| $(w_{XX}^+, w_{XY}^+)$ | $(u_{XX}^+ + v_{XX}^+ + u_X v_X + u_{XY}^+ + v_{XY}^+ + u_X v_Y + u_Y v_X)$                                                                                                                                                                                                        |
|                        | $\sum_{i,j} e^{-l(\mathcal{P}_{i,j})}$ for all leaf nodes $i$ colored $X$ and $j$ colored $X/Y$ under $w$                                                                                                                                                                          |
| $(w_{XX}^-, w_{XY}^-)$ | $(u_{XX}^- + v_{XX}^- + u_X v_X)(1 - s(e)), (u_{XY}^- + v_{XY}^- + u_X v_Y + u_Y v_X)(1 - s(e))$                                                                                                                                                                                   |
|                        | $\sum_{i,j} e^{-l(\mathcal{P}_{i,j})} (1 - s(\mathcal{P}_{m(i,j),p}))$ for all leaf nodes $i$ colored $X$ and $j$ colored $X/Y$ under $w$                                                                                                                                          |
| $(w_{XX Y}, w_{XY Z})$ | $(u_{XX Y} + v_{XX Y} + (u_{XX}^+ - u_{XX}^-)v_Y + u_Y(v_{XX}^+ - v_{XX}^-))e^{-l(e)},$<br>$(u_{XY Z} + v_{XY Z} + (u_{XY}^+ - u_{XY}^-)v_Z + u_Z(v_{XY}^+ - v_{XY}^-))e^{-l(e)}$                                                                                                  |
|                        | $\sum_{i,j,k} e^{-l(\mathcal{P}_{i,j}) - l(\mathcal{P}_{k,p})} s(\mathcal{P}_{m(i,j),m(i,k)})$ for leaf nodes $i$ colored $X$ , $j$ colored $X/Y$ , $k$ colored $Z$ under $w$ , and $m(i, j)$ under $m(i, k)$                                                                      |
| $w_{XX YZ}$            | $v_X u_Y Z X + u_X v_Y Z X + u_{XX} v_Y + v_{XX} u_Y + u_{XX Y} v_Z + v_{XX Y} u_Z$<br>$+ (u_{YZ}^+ v_{XX}^- - u_{YZ}^- v_{XX}^+) + (u_{XX}^+ v_{YZ}^+ - u_{XX}^- v_{YZ}^-)$                                                                                                       |
|                        | $\sum_{h,i,j,k} w_G(hi jk)$ for all leaf nodes $h, i$ colored $X$ , $j$ colored $Y$ , $k$ colored $Z$ , and $w = \text{MRCA } h, i, j, k$                                                                                                                                          |
| $Q$                    | $\sum_{G \in \mathcal{G}} \sum_w (w_{AA BC} + w_{BB AC} + w_{CC AB})$ for internal nodes $w$ in $G$                                                                                                                                                                                |
|                        | $\sum_{G \in \mathcal{G}} \sum_{h,i,j,k} w_G(hi jk)$ for leaf nodes $h, i, j, k$ in $G$ where $h, i$ have the same color and $i, j, k$ have different colors; when species coloring matches all gene trees, $Q = W[A B C] = \sum_{G \in \mathcal{G}} W(A B C, G)$ (Proposition 5). |

**Table S2.** Running time of species tree inference methods on biological datasets. We use 5.17.3 version of ASTRAL-III if not otherwise clarified.

| Dataset      | $n$  | $k$    | Method             | #Cores | Wall-clock time | CPU time |
|--------------|------|--------|--------------------|--------|-----------------|----------|
| OneKP        | 1178 | 410    | wASTRAL-h          | 16     | 17.1 min        | 4.57 hr  |
|              |      |        | ASTRAL-III (5.0.3) | 1      | 17.2 hr         | 17.2 hr  |
| Canis        | 48   | 449450 | wASTRAL-h          | 1      | 17.7 hr         | 17.7 hr  |
| Avian        | 48   | 14446  | wASTRAL-h          | 16     | 1.76 min        | 28.1 min |
|              |      |        | ASTRAL-III         | 16     | 20.9 min        | 5.57 hr  |
| Cetacean     | 98   | 3191   | wASTRAL-h          | 16     | 35.2 sec        | 9.39 min |
|              |      |        | ASTRAL-III         | 16     | 1.97 min        | 31.5 min |
| Nomiinae     | 32   | 853    | wASTRAL-h          | 1      | 5.93 sec        | 5.93 sec |
|              |      |        | ASTRAL-III         | 1      | 8.64 sec        | 8.64 sec |
| Lepidoptera  | 203  | 1930   | wASTRAL-h          | 16     | 2.02 min        | 32.3 min |
|              |      |        | ASTRAL-III         | 16     | 9.14 min        | 2.44 hr  |
| Papilionidae | 61   | 6405   | wASTRAL-h          | 16     | 24.8 sec        | 6.61 min |
|              |      |        | ASTRAL-III         | 16     | 1.11 min        | 17.8 min |

## Supplementary Figures and Tables

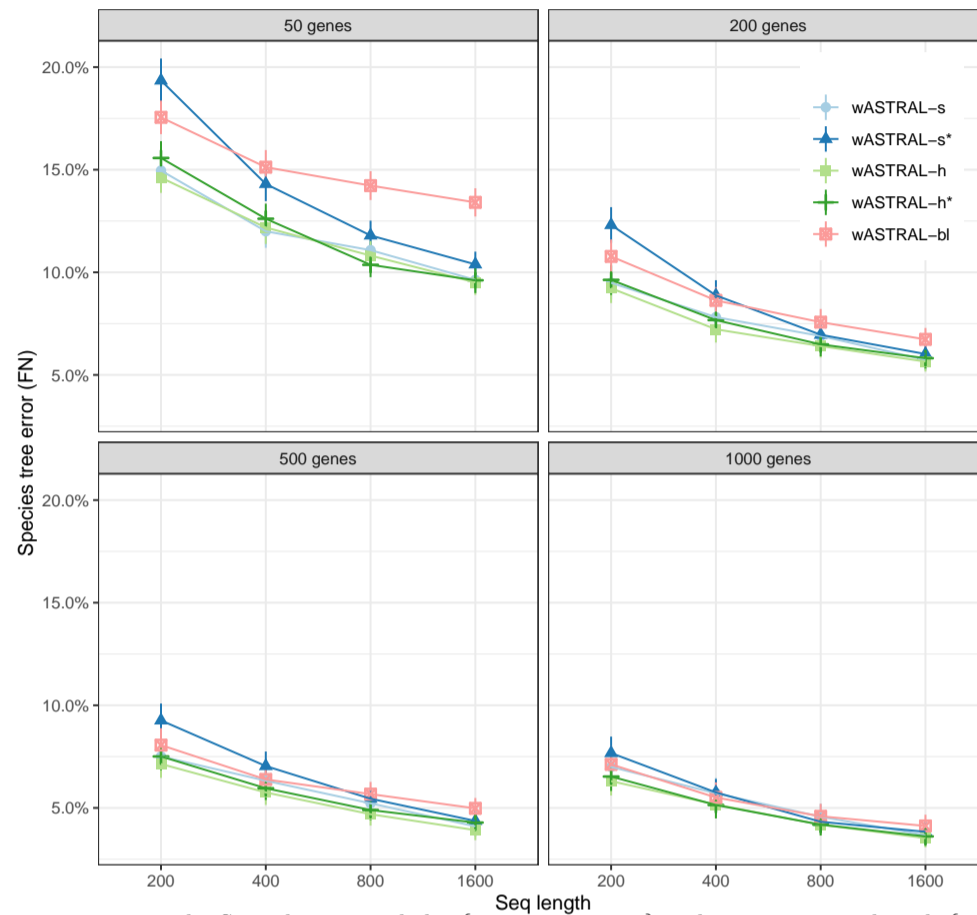

**FIG. S1.** Species tree error on the S100 dataset with  $k = \{50, 200, 500, 1000\}$  and gene sequence length  $\{200, 400, 800, 1600\}$ . Top: comparison of by weighting scheme. Results with aBayes supports are labeled wASTRAL-s and wASTRAL-h; results with bootstrap support are labeled wASTRAL-s\* and wASTRAL-h\*. Bottom: comparison with other methods, similar to Figure 2a, but with a y-axis kept fixed.

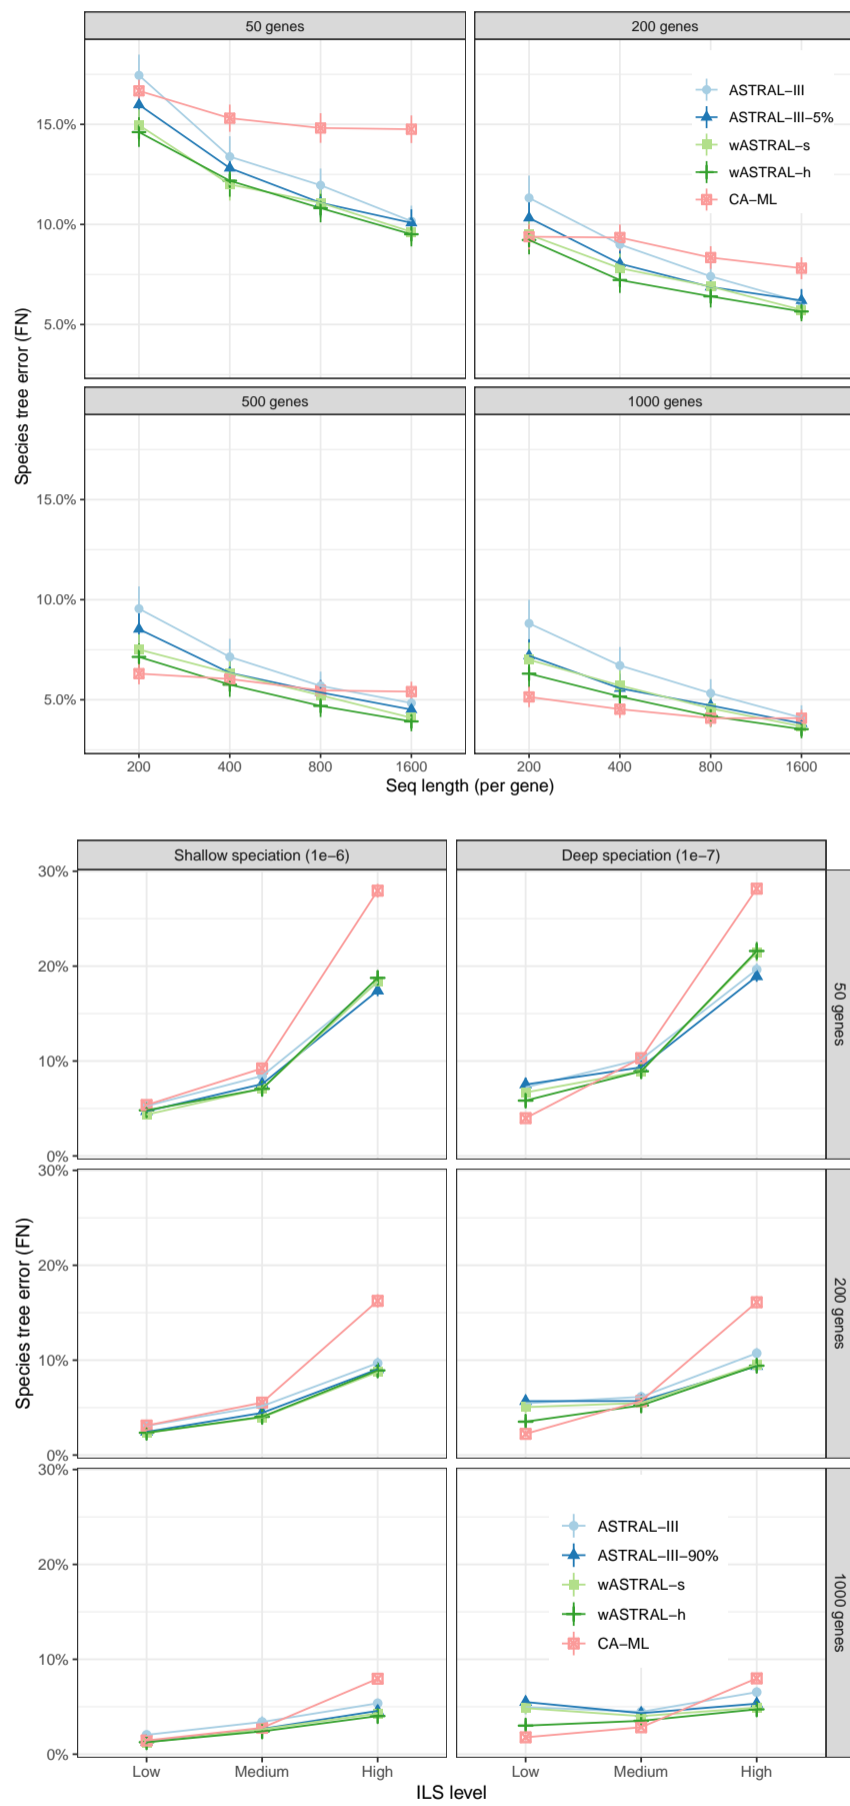

**FIG. S2.** Species tree error on the S100 dataset (top) and S200 dataset (bottom), similar to Figures 2 and 3 of the main paper, but with y axis kept fixed.

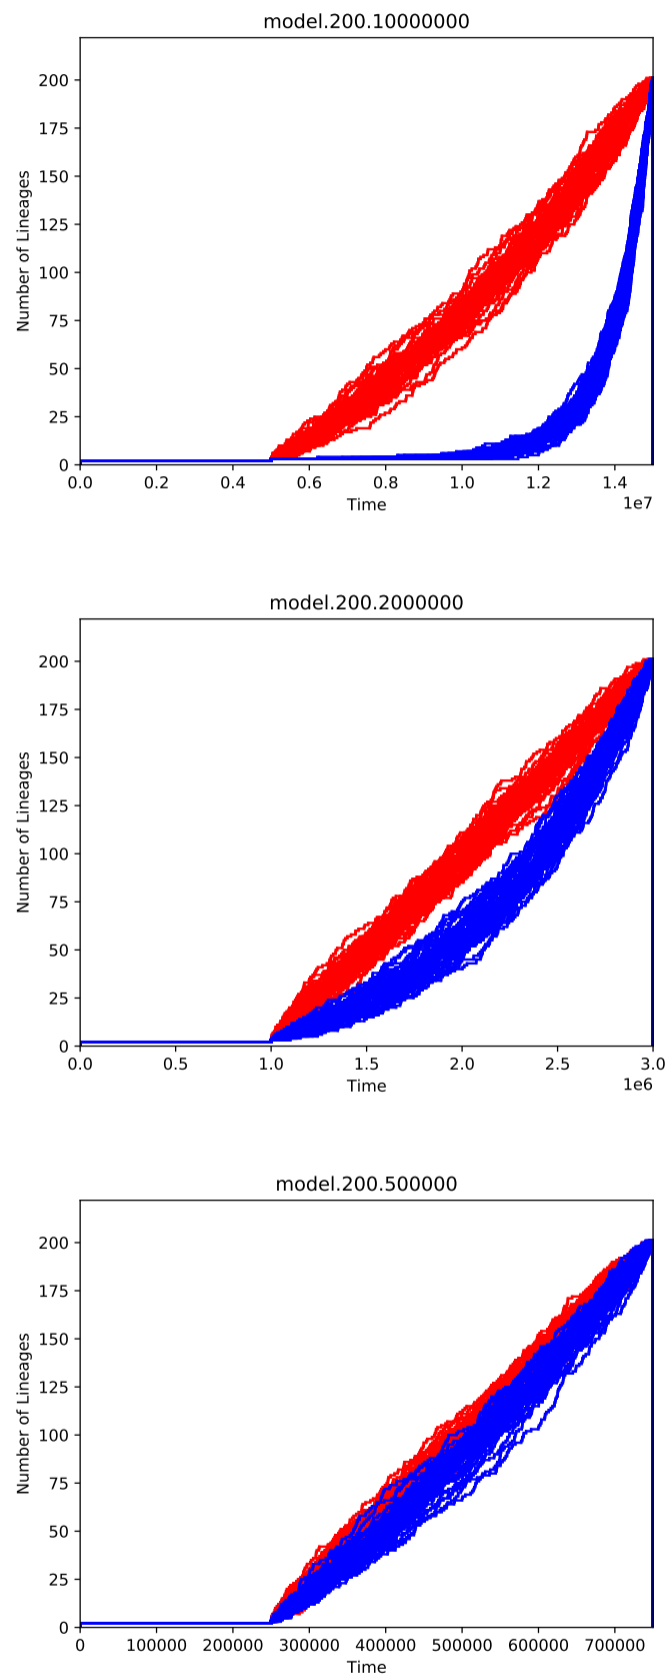

**FIG. S3.** Lineage Through Time (LTT) plots for three simulated model conditions with  $10^{-7}$  (red) and  $10^{-6}$  (blue) rates tend to lead to deeper and shallower speciation.

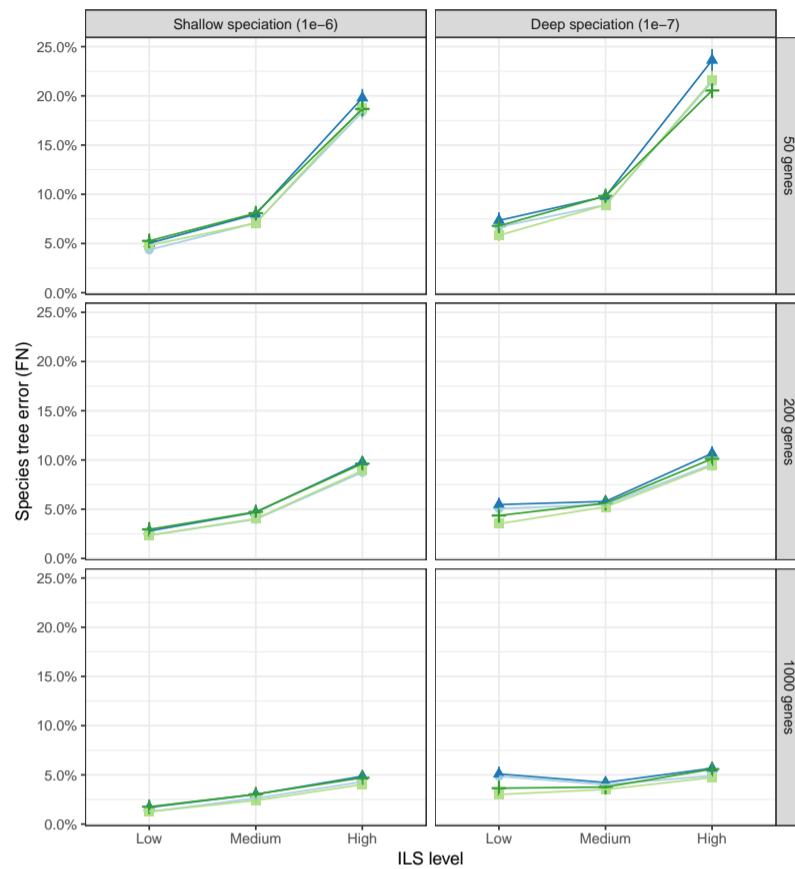

**FIG. S4.** Species tree error by weighting scheme on the S200 dataset with  $k = \{50, 200, 1000\}$  and population size (ILS levels). Species tree shape with parameters E1-6 and E1-7 are used. Results with aBayes supports are labeled wASTRAL-s and wASTRAL-h; results with SH-like support are labeled wASTRAL-s\* and wASTRAL-h\*.

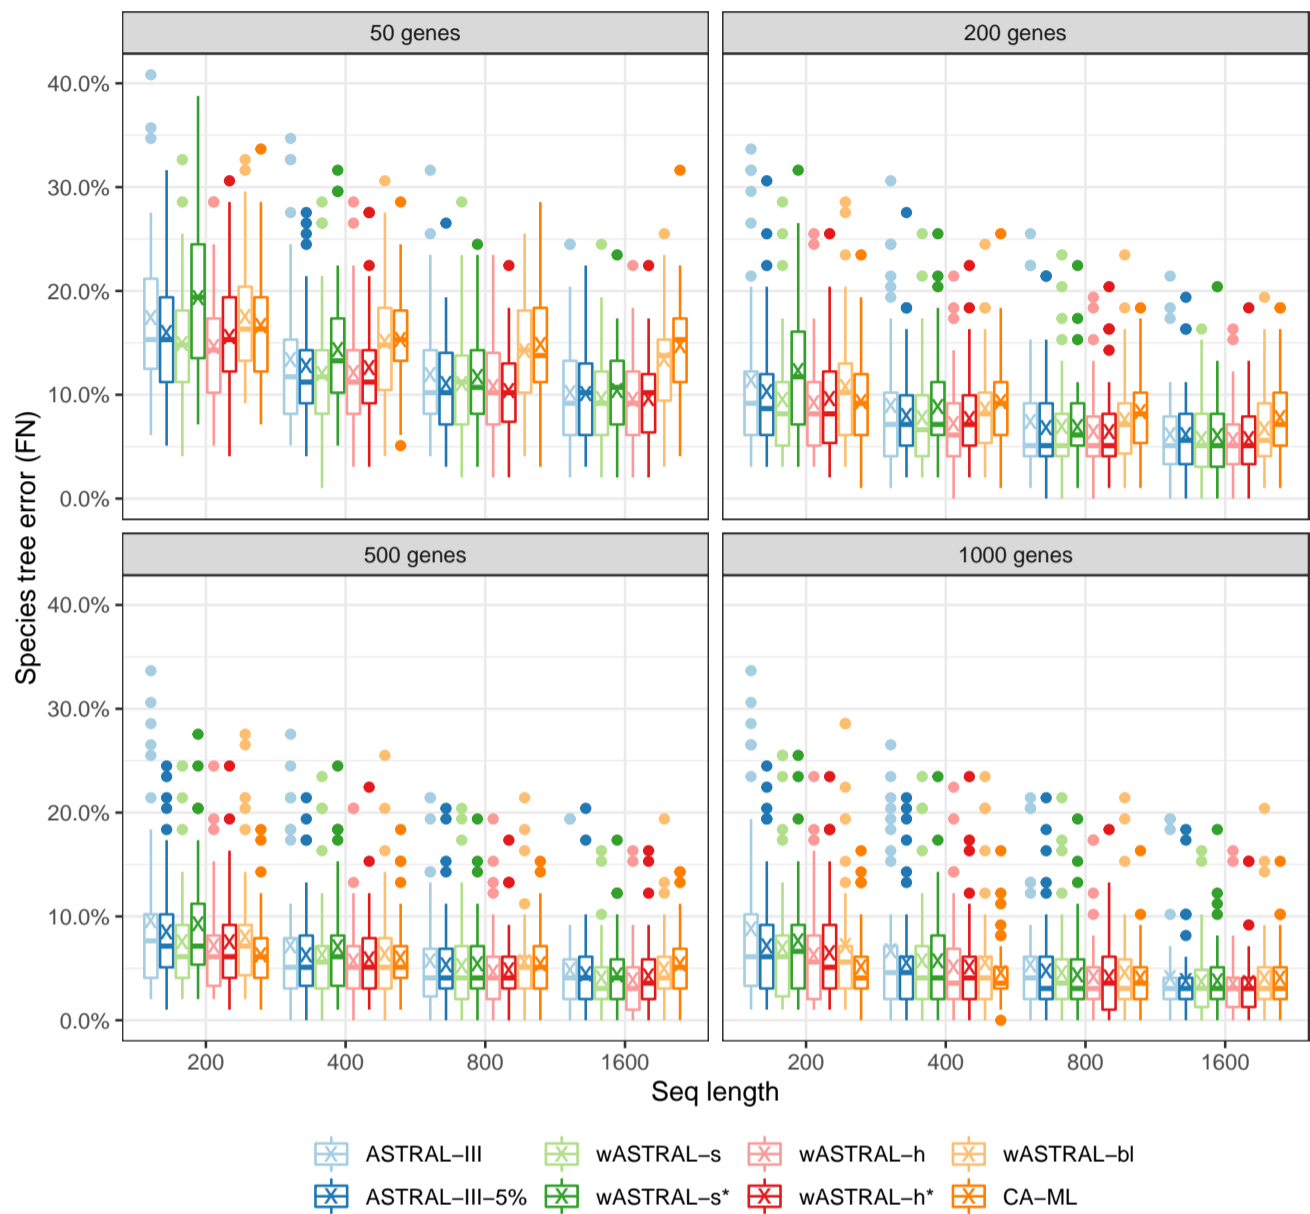

**FIG. S5.** Species tree error on the S100 dataset with  $k = \{50, 200, 500, 1000\}$  and gene sequence length  $\{200, 400, 800, 1600\}$ . Results with aBayes supports are labelled wASTRAL-s and wASTRAL-h; results with bootstrap support are labelled wASTRAL-s\* and wASTRAL-h\*.

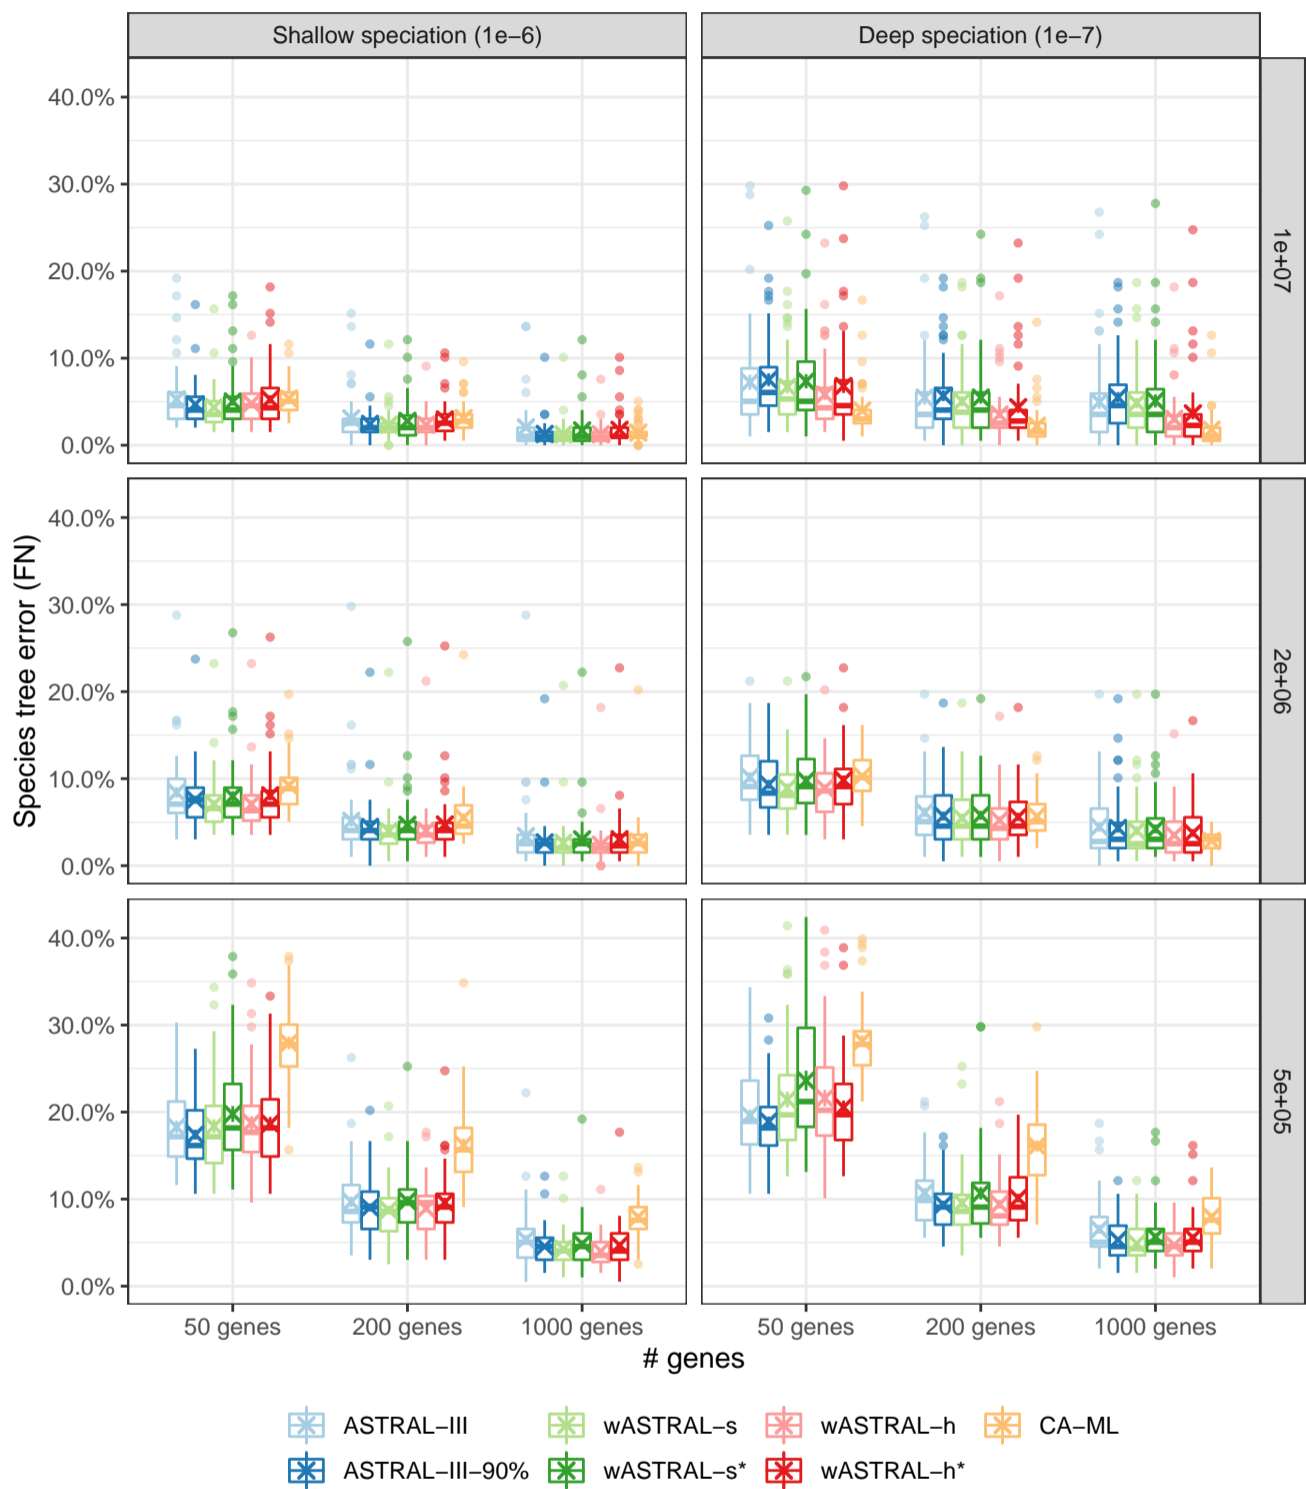

**FIG. S6.** Species tree error on the S200 dataset with  $k = \{50, 200, 1000\}$  and population size (ILS levels). Species tree shape with parameter E1-6 and E1-7 (box columns) and ILS levels (box rows) low ( $1e+07$ ), medium ( $2e+06$ ), and high ( $5e+05$ ) are used. Results with Bayesian supports are labeled wASTRAL-s and wASTRAL-h; results with SH-like support are labeled wASTRAL-s\* and wASTRAL-h\*.



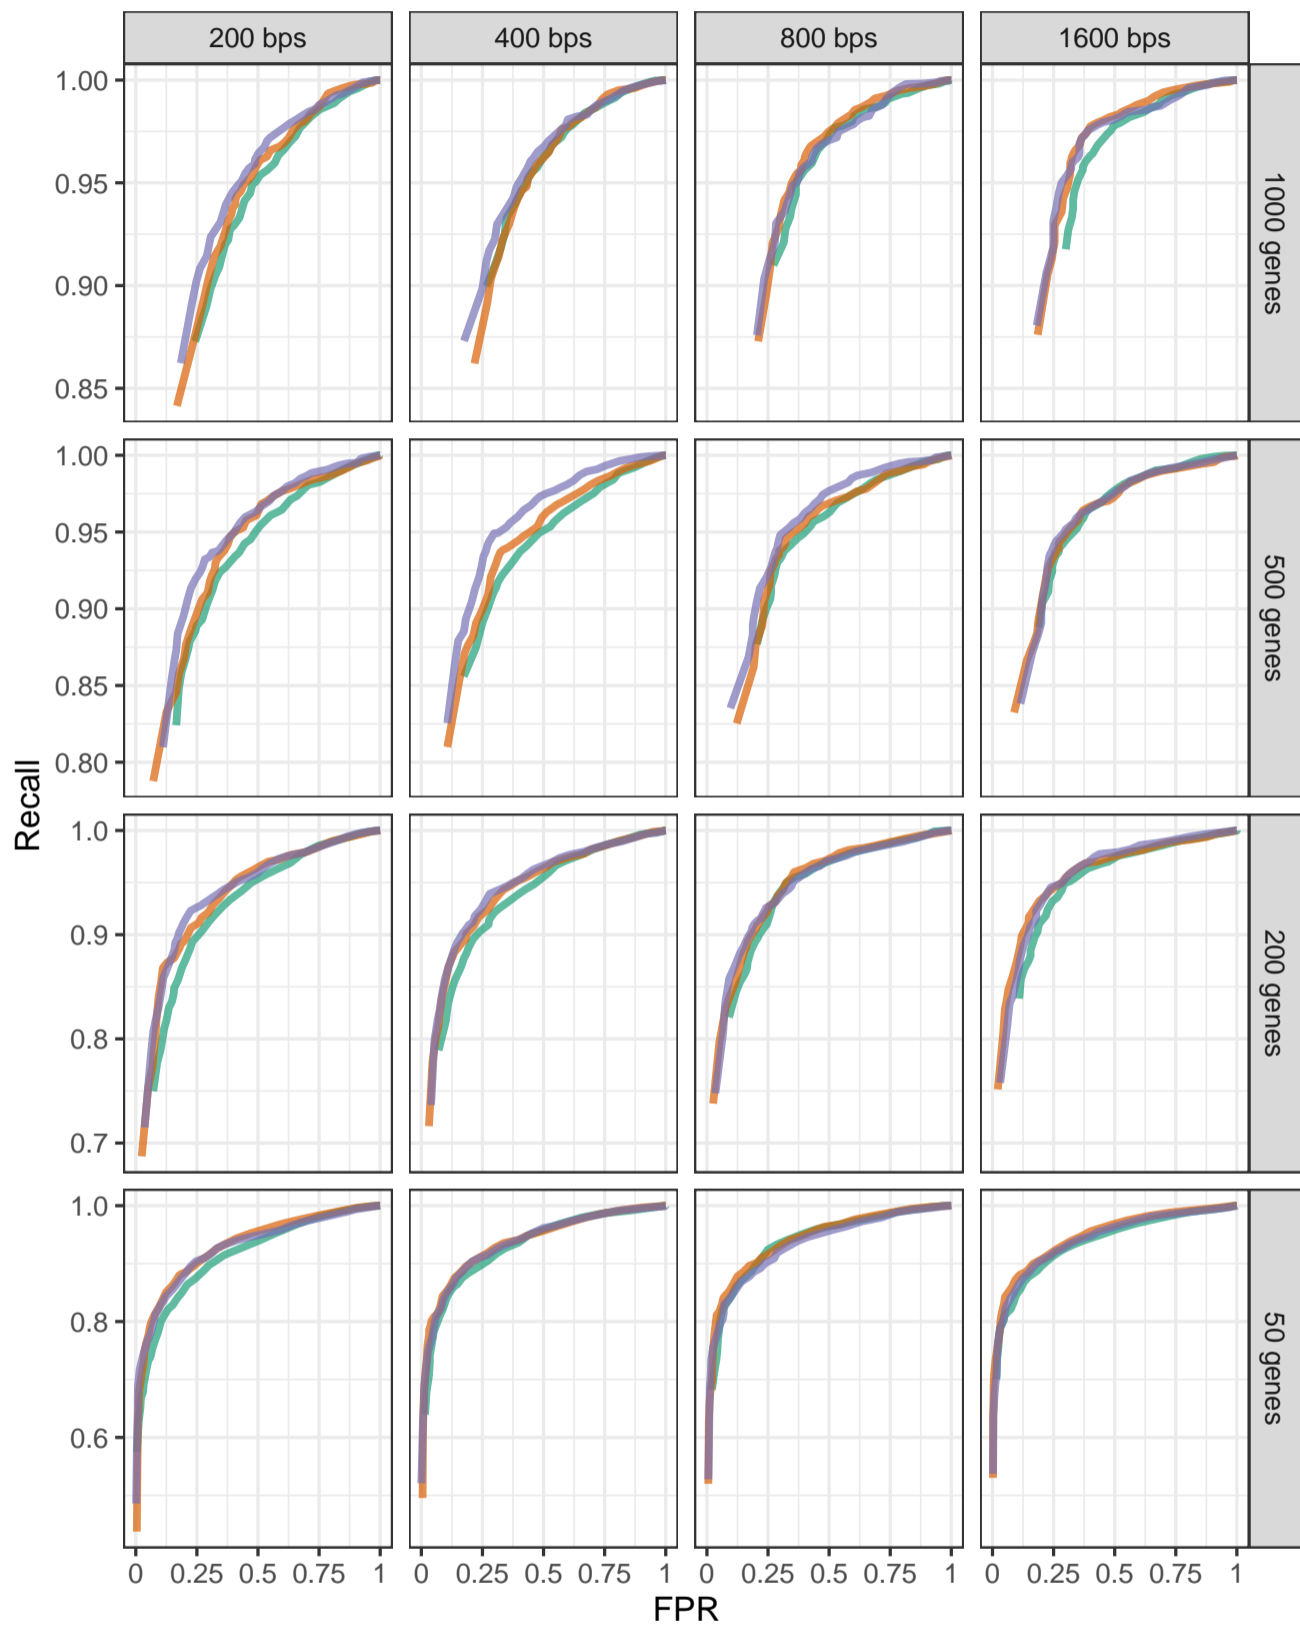

**FIG. S7.** ROC of S100 dataset with  $k = \{50, 200, 500, 1000\}$  and gene sequence length  $\{200, 400, 800, 1600\}$  as we change the threshold of support considered. Results with aBayes supports are labelled wASTRAL-s and wASTRAL-h; results with FastTree-2 bootstrap support are labelled wASTRAL-s\* and wASTRAL-h\*.

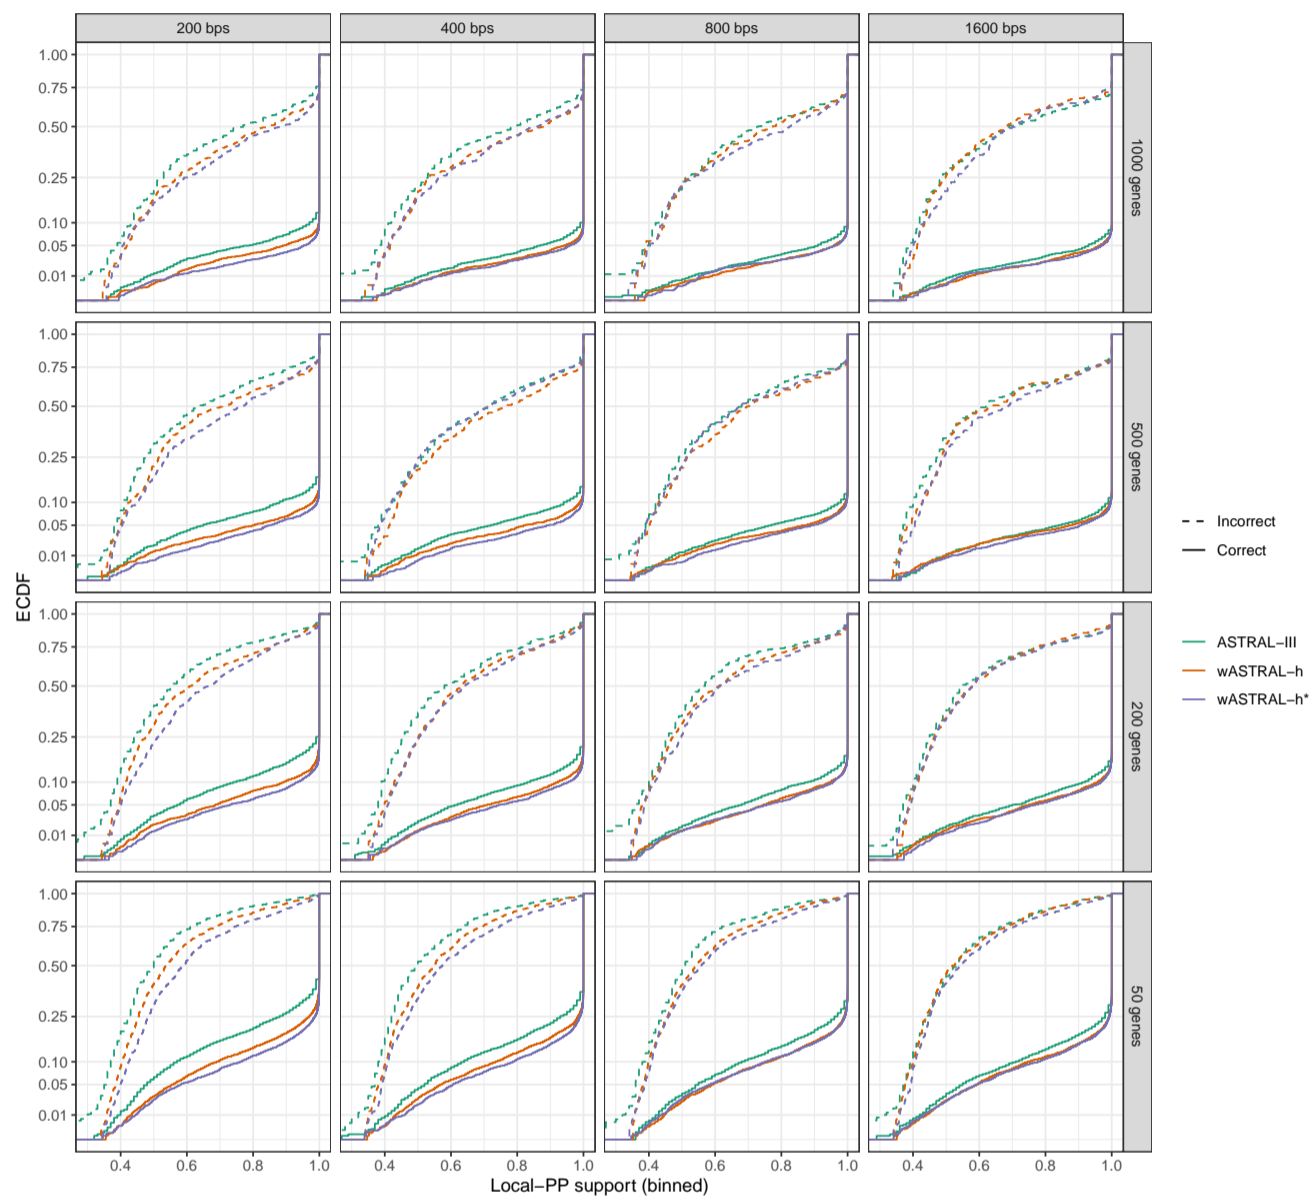

**FIG. S8.** ECDF of S100 dataset with  $k = \{50, 200, 500, 1000\}$  and gene sequence length  $\{200, 400, 800, 1600\}$ . Results with aBayes supports are labelled wASTRAL-s and wASTRAL-h; results with FastTree-2 bootstrap support are labelled wASTRAL-s\* and wASTRAL-h\*.

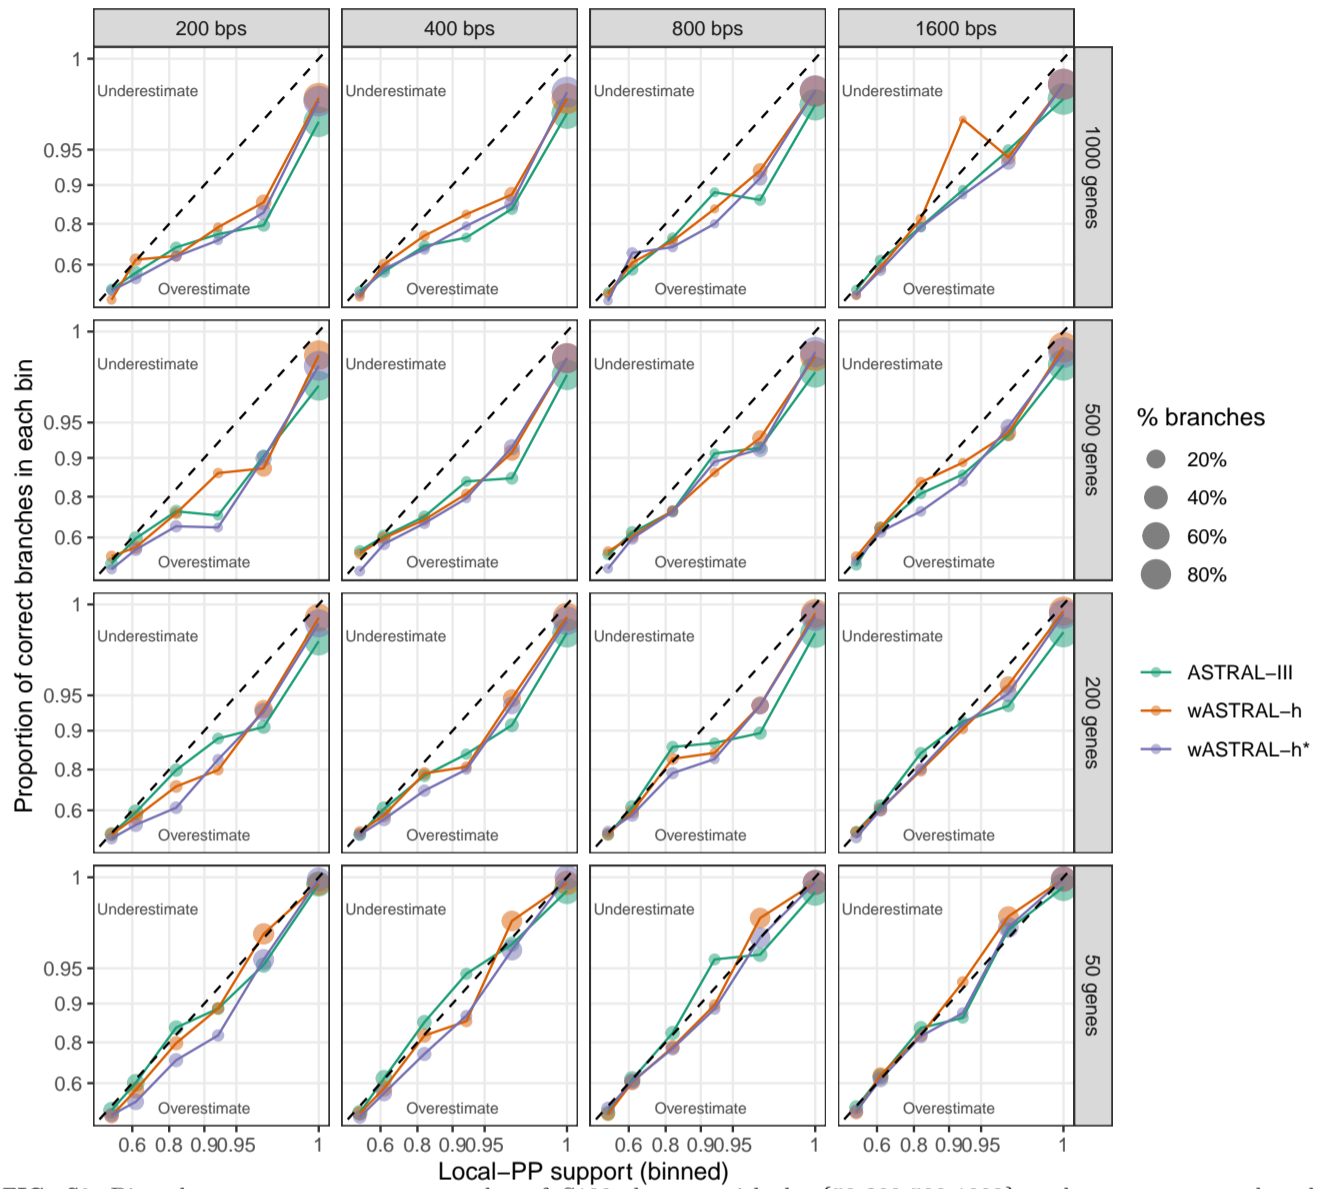

**FIG. S9.** Binned accuracy-verses-support plot of S100 dataset with  $k = \{50, 200, 500, 1000\}$  and gene sequence length  $\{200, 400, 800, 1600\}$ . Results with aBayes supports are labelled wASTRAL-s and wASTRAL-h; results with FastTree-2 bootstrap support are labelled wASTRAL-s\* and wASTRAL-h\*.

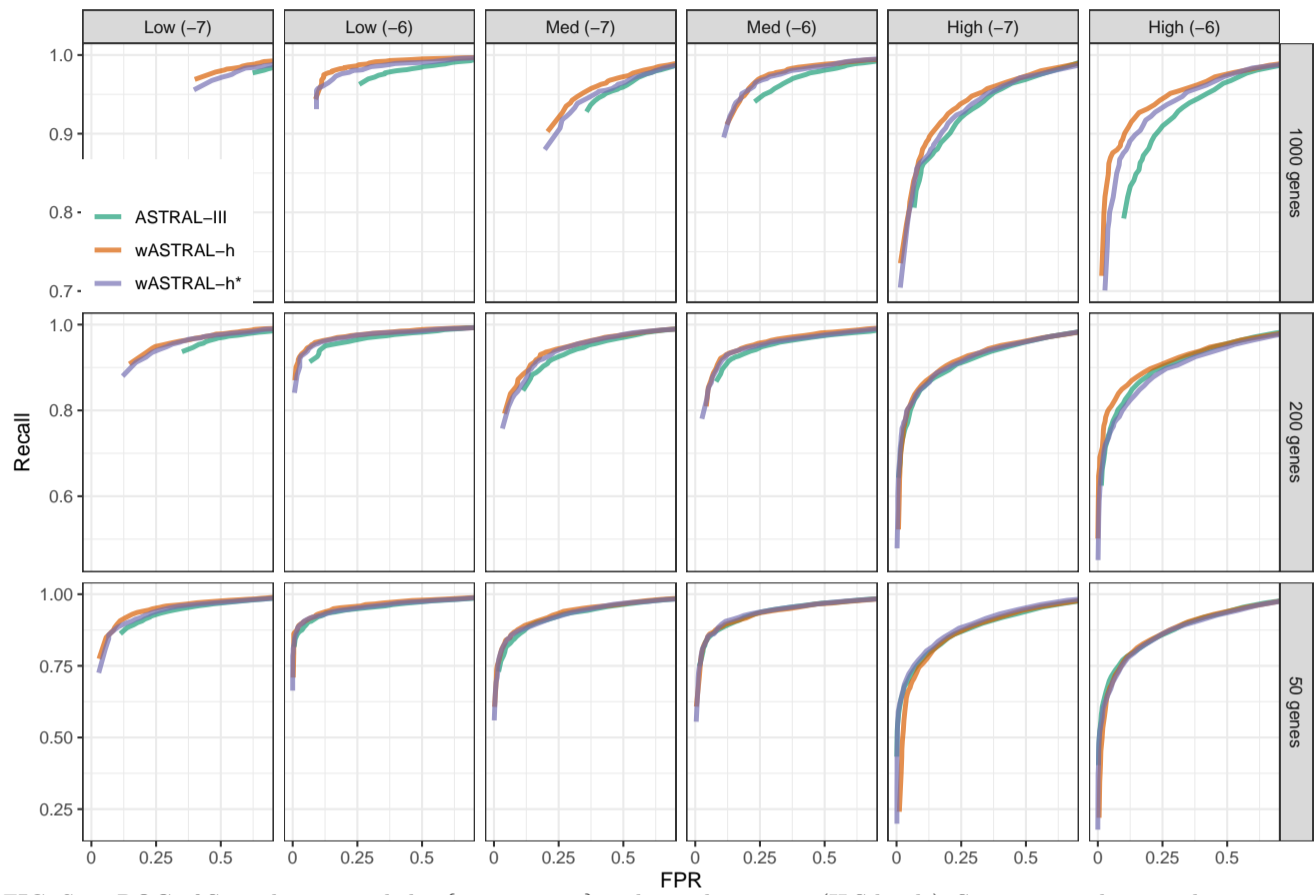

**FIG. S10.** ROC of S200 dataset with  $k = \{50, 200, 1000\}$  and population size (ILS levels). Species tree shape with parameter E1-6 and E1-7 are used. Results with aBayes supports are labeled wASTRAL-h; results with SH-like support are labelled wASTRAL-h\*.

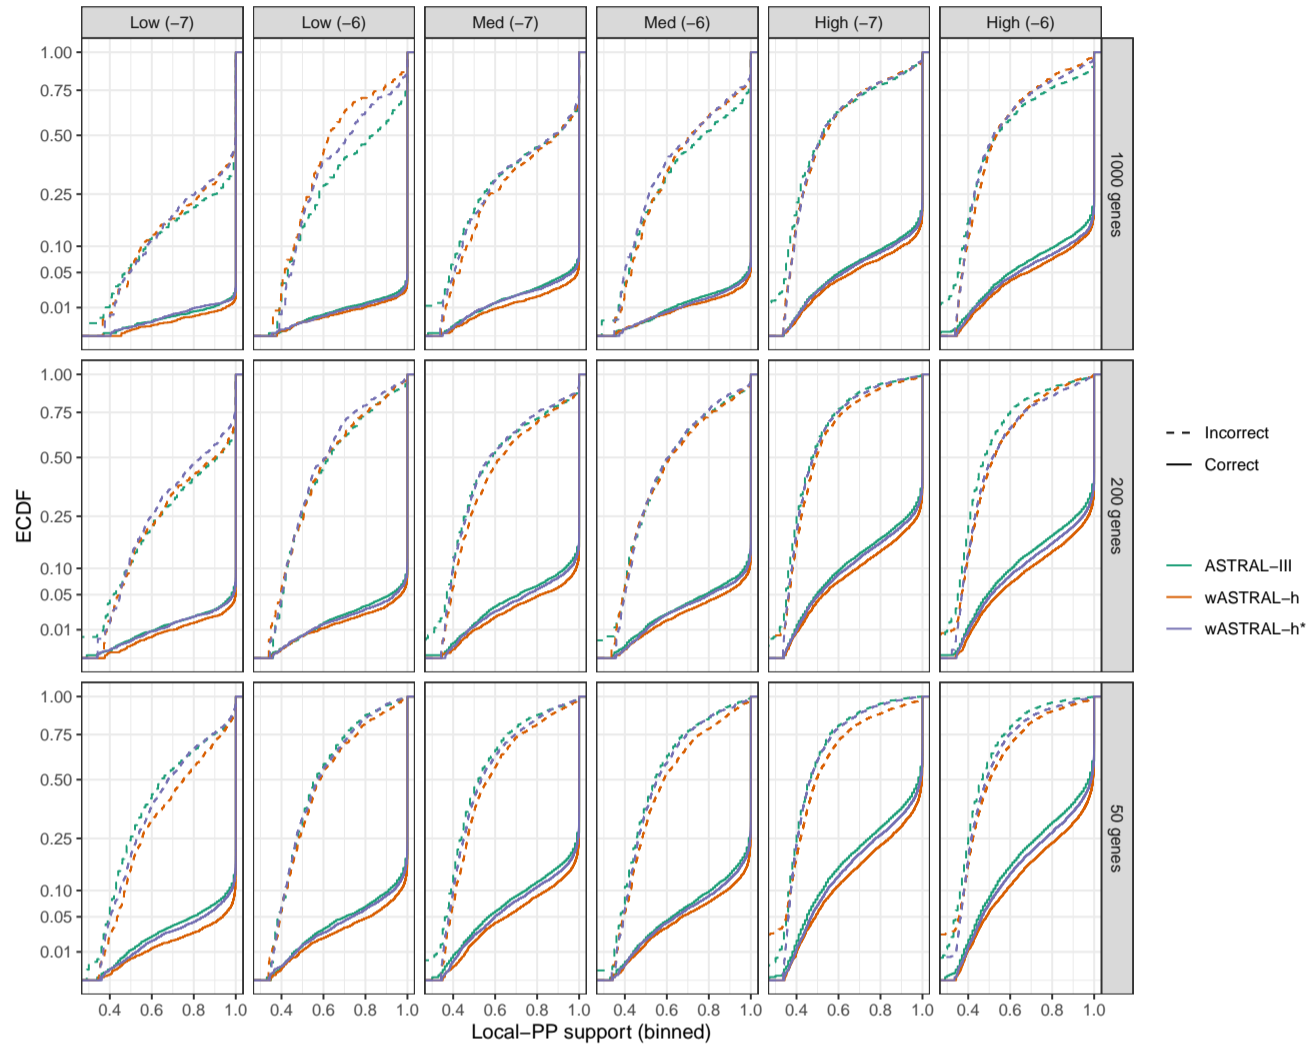

**FIG. S11.** ECDF of S200 dataset with  $k = \{50, 200, 1000\}$  and population size (ILS levels). Species tree shape with parameter E1-6 and E1-7 (box columns) and ILS levels (box rows) low ( $1e+07$ ), medium ( $2e+06$ ), and high ( $5e+05$ ) are used. Results with aBayes supports are labelled wASTRAL-h; results with SH-like support are labelled wASTRAL-h\*.

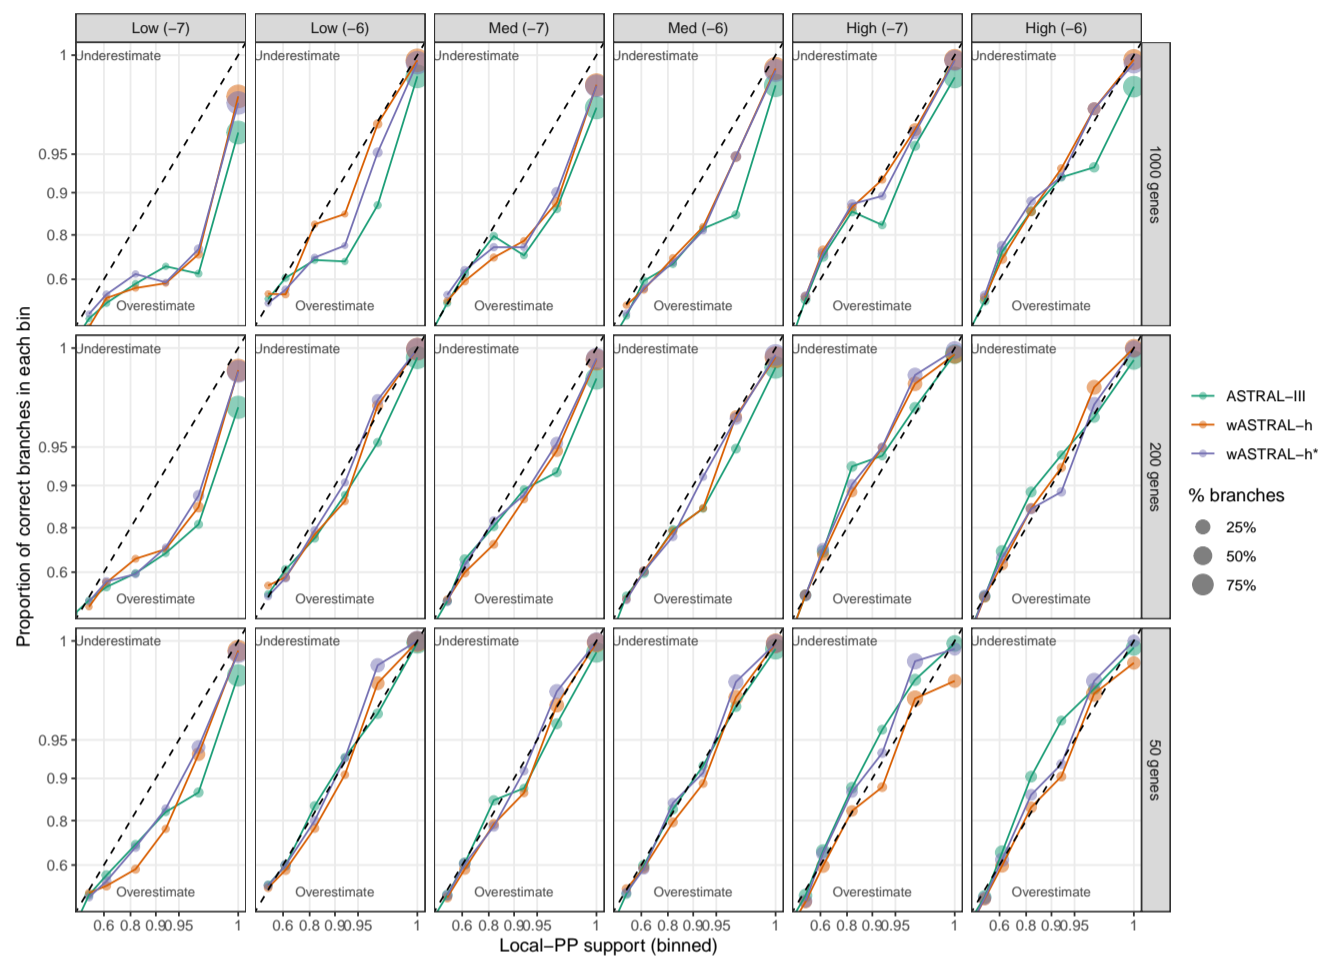

**FIG. S12.** Binned accuracy-verses-support plot of S200 dataset with  $k = \{50, 200, 1000\}$  and population size (ILS levels). Species tree shape with parameter E1-6 and E1-7 are used. Results with aBayes supports are labeled wASTRAL-h; results with SH-like support are labeled wASTRAL-h\*.

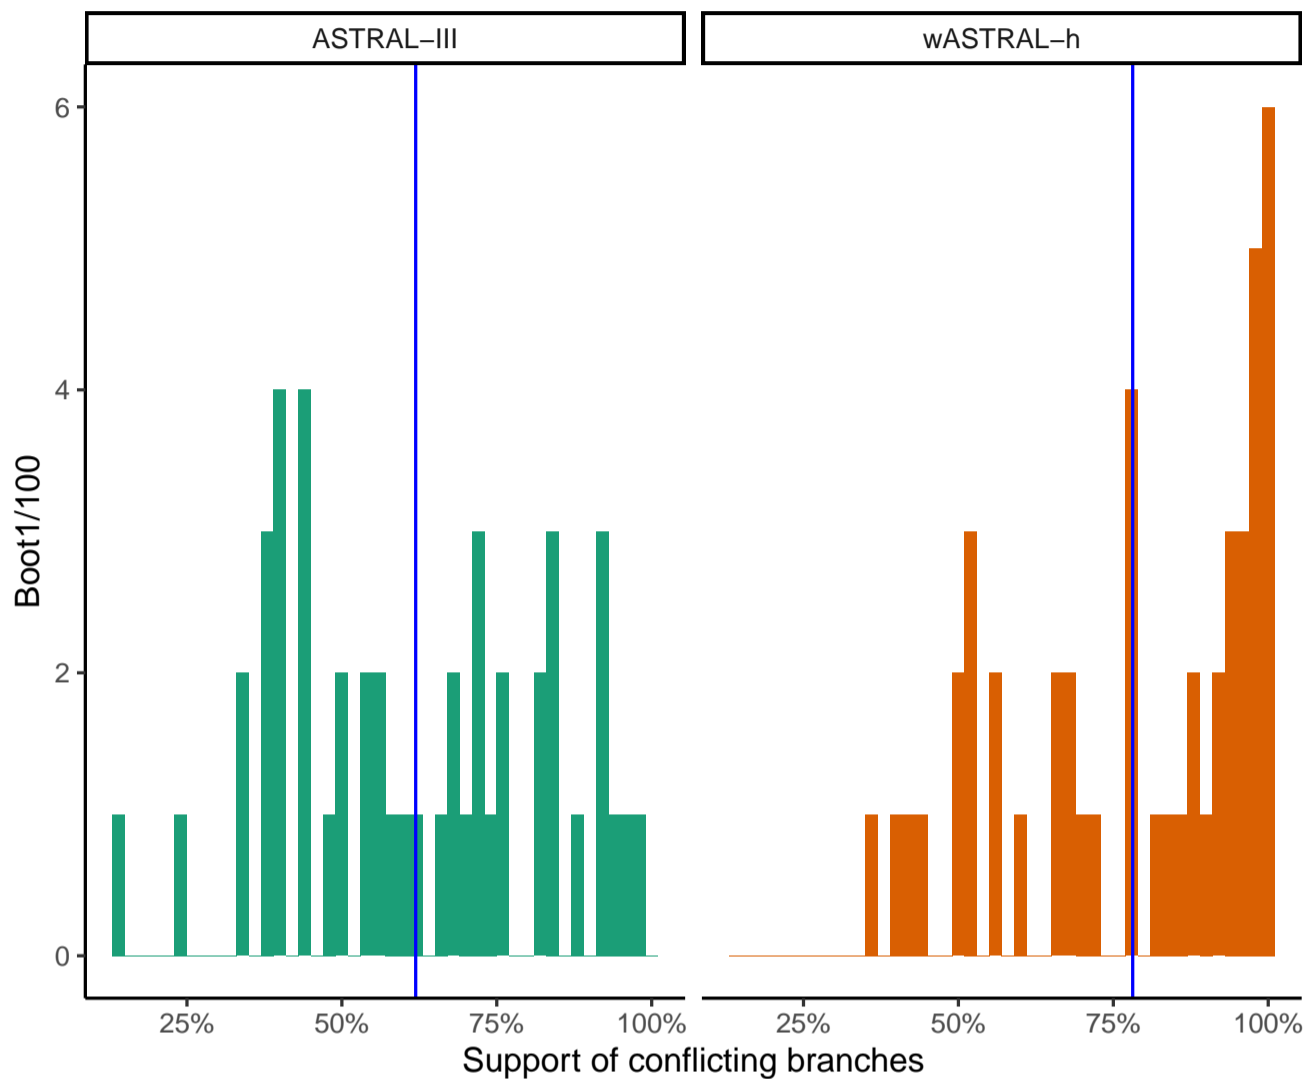

**FIG. S13.** The distribution of support values of conflicting branches between wASTRAL-h and ASTRAL-III on the 1kp dataset. The ASTRAL-III conflicting branches range between 14% and 99.00% with a mean of 62%. The wASTRAL-h conflicting branches range between 37% and 99.98% with a mean of 78%.

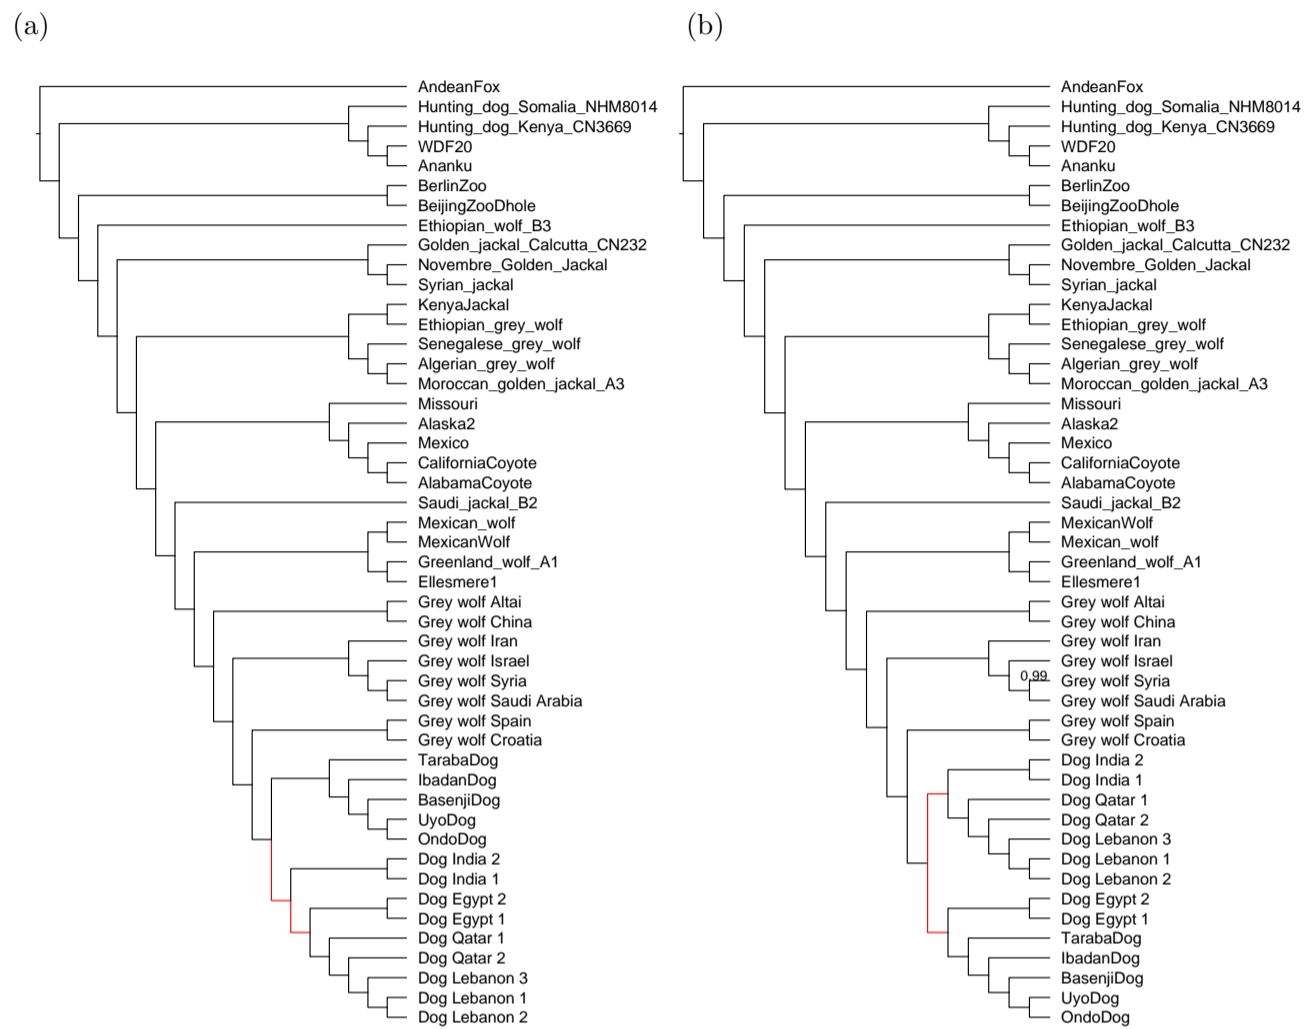

**FIG. S14.** Inferred species trees (a) from wASTRAL-hybrid with FastTree-2 branch support values as weights using all 459,450 gene trees and (b) from ASTRAL-III using a subset of 100,000 gene trees on canis dataset. Branches support of 100% are omitted.



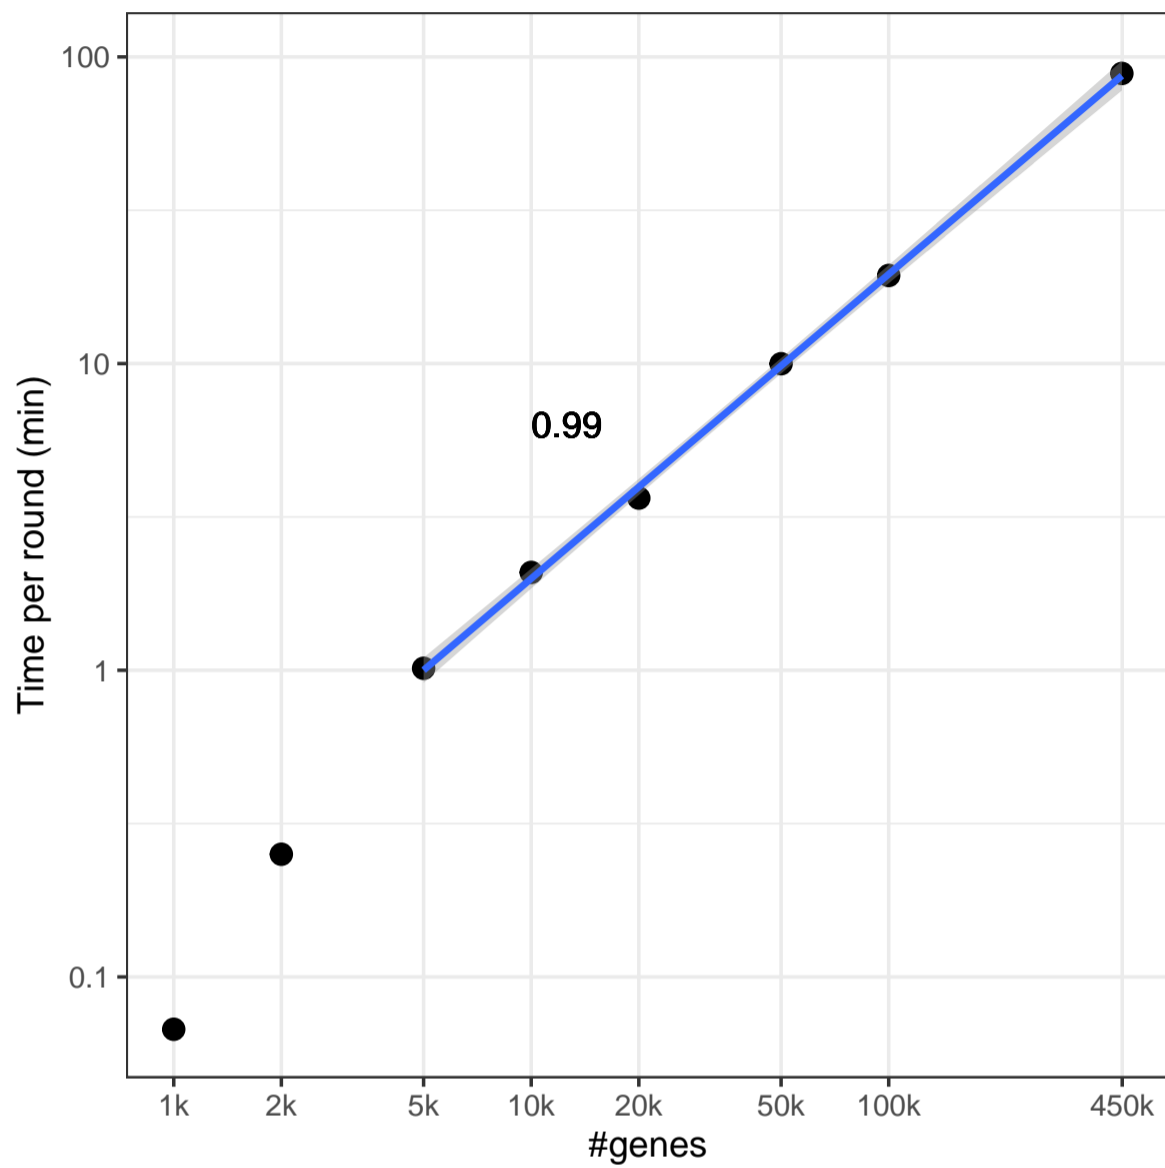

**FIG. S15.** Normalized time per round of placement by dividing running time by the total number of rounds of placements for wASTRAL-h on the Canis dataset for various  $k$  using the new pipeline.

(a)

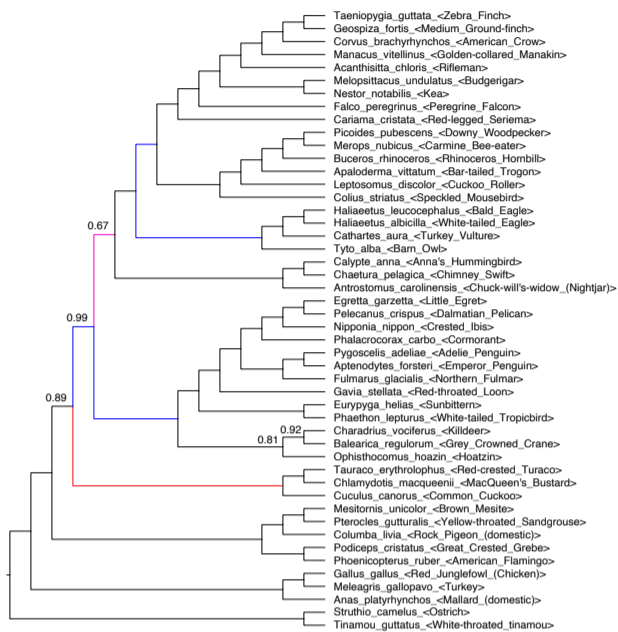

(b)

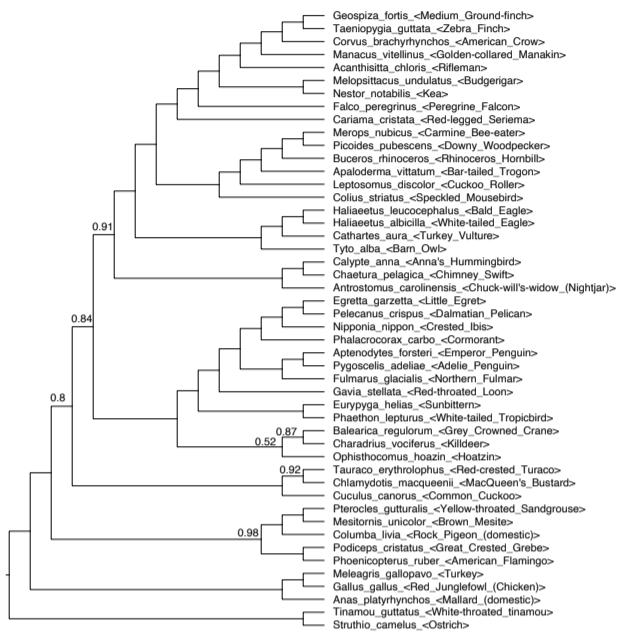

**FIG. S16.** Inferred species trees from (a) wASTRAL-hybrid with normalized bootstrap support values as weights and (b) ASTRAL-III on gene trees with contracted branches on avian dataset. Branches support of 100% are omitted. Branches that disagree with concatenation (blue), MP-EST binned (red) or both (purple) are identified on the wASTRAL-h tree.

(a)

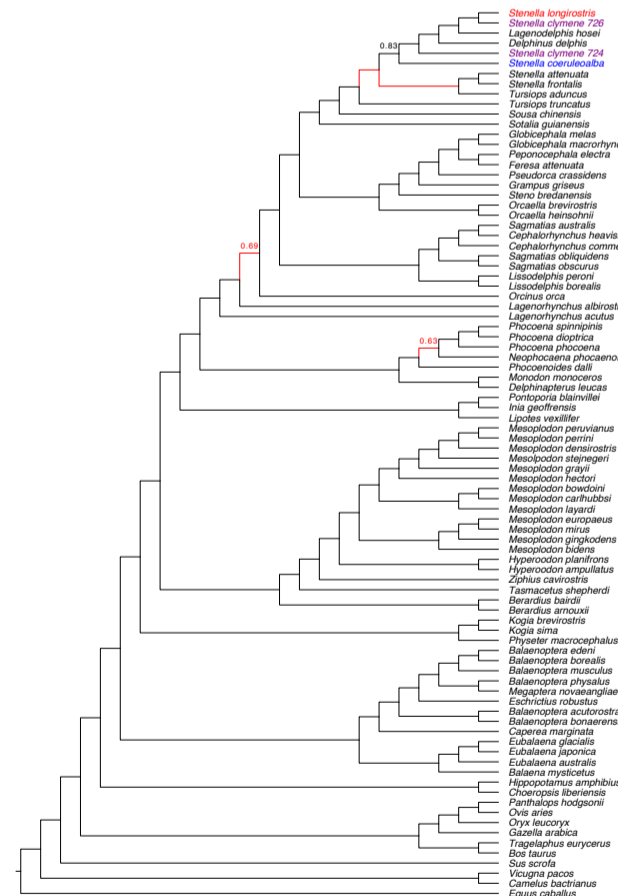

(b)

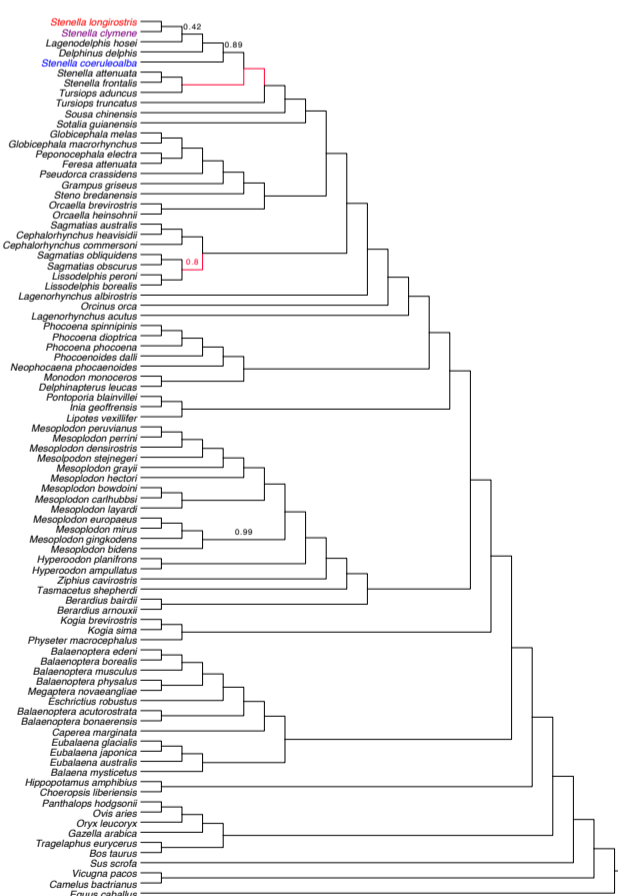

**FIG. S17.** Inferred species trees from (a) wASTRAL-hybrid with normalized Bayesian support values as weights (with clades of taxa from the same species contracted) and (b) ASTRAL-multi on cetacean dataset. Branches support of 100% are omitted. Branches conflicting with RAxML concatenation are marked red.

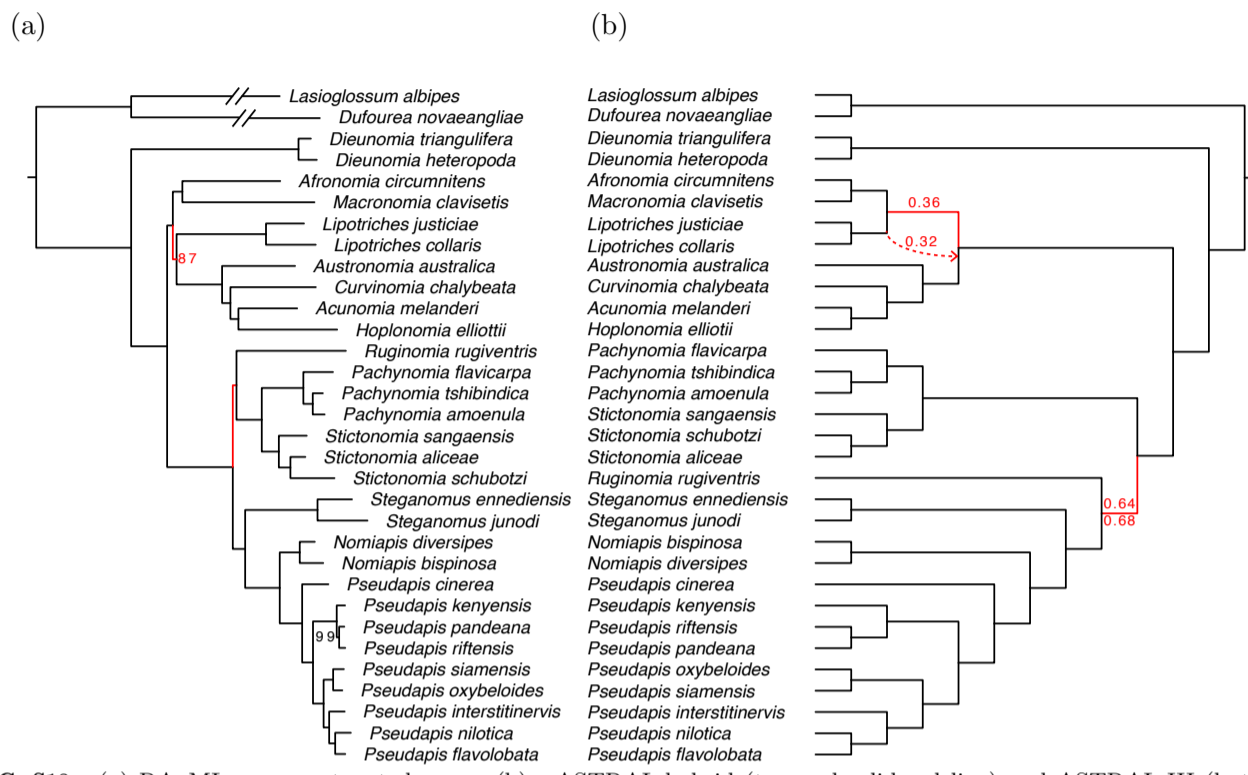

**FIG. S18.** (a) RAxML on concatenated genes; (b) wASTRAL-hybrid (top and solid red line) and ASTRAL-III (bottom and dashed red line) on Nomiinae dataset.

(a)

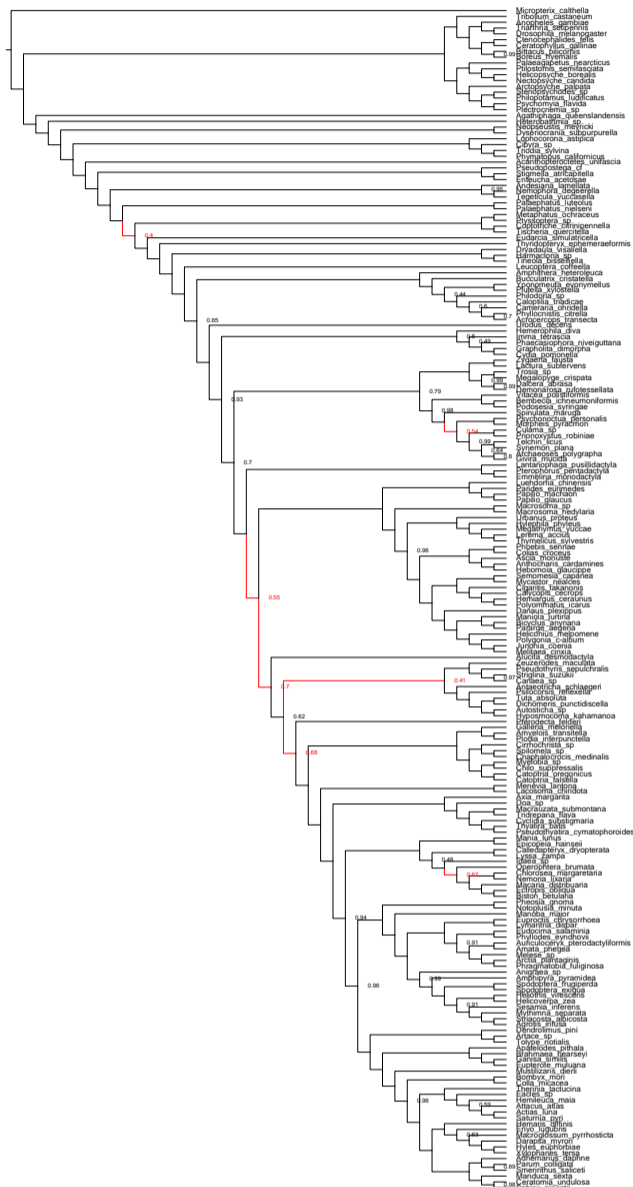

(b)

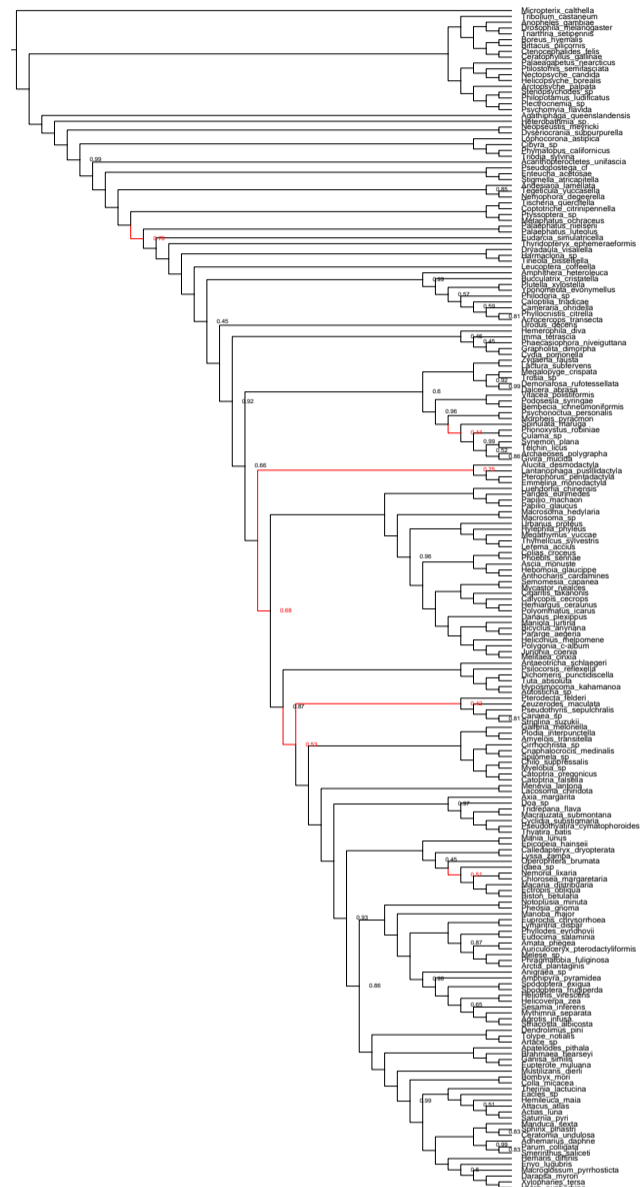

**FIG. S19.** Inferred species trees from (a) wASTRAL-hybrid with normalized bootstrap support values as weights and (b) ASTRAL-III on Lepidoptera dataset.

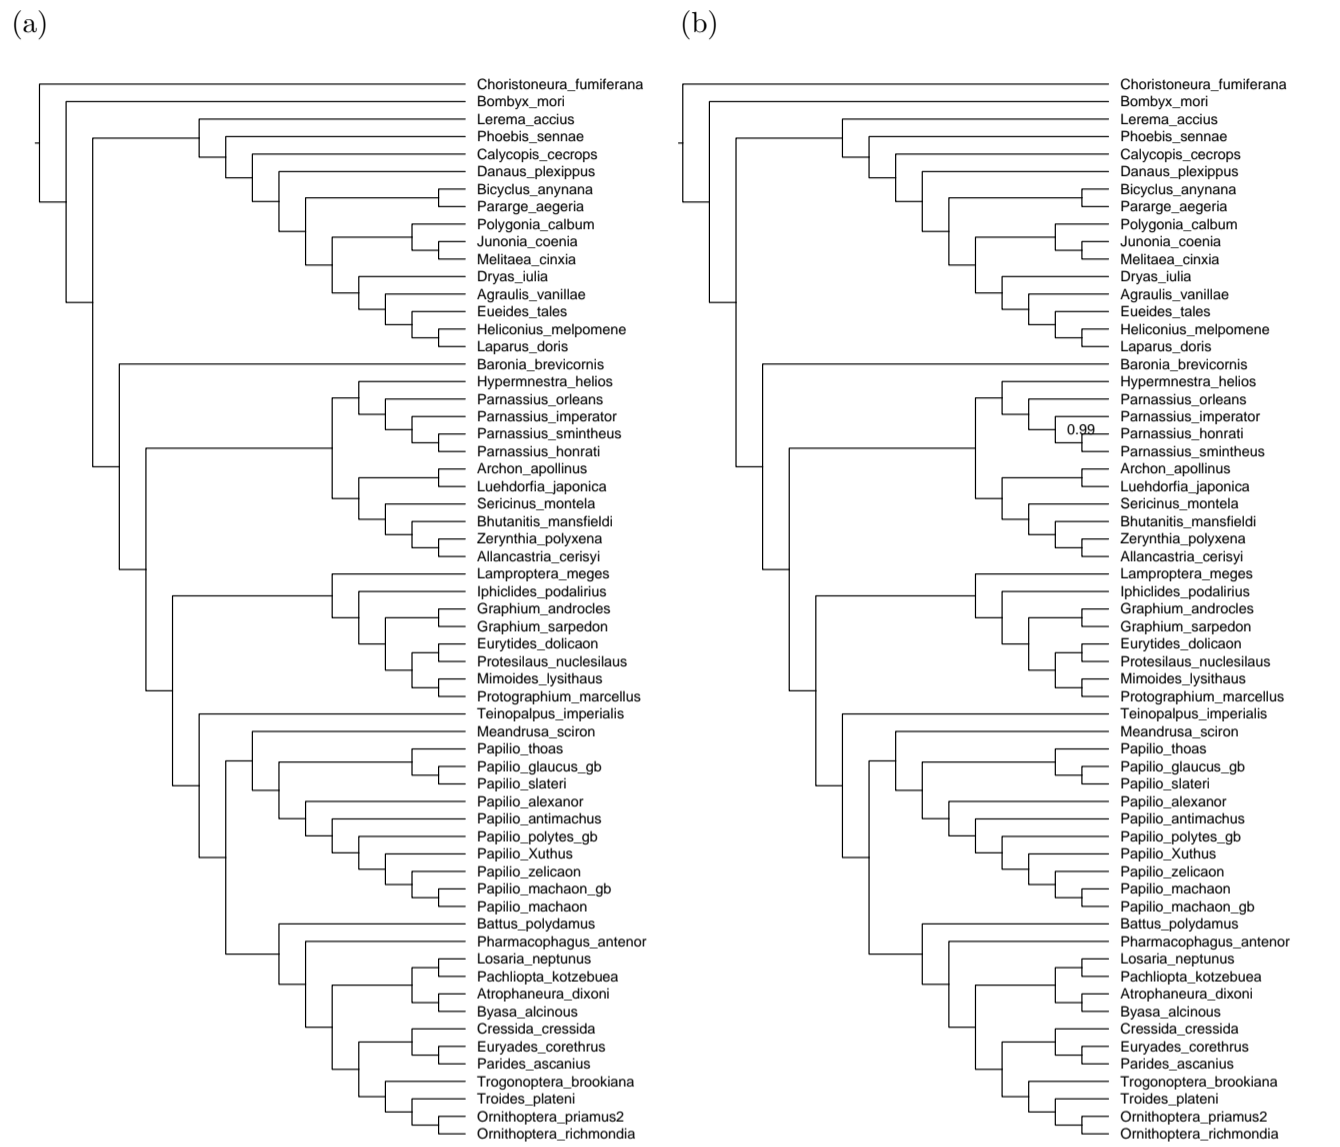

**FIG. S20.** Inferred species trees from (a) wASTRAL-hybrid with normalized approximate Bayesian support values as weights and (b) ASTRAL-III on Papilionidae dataset.

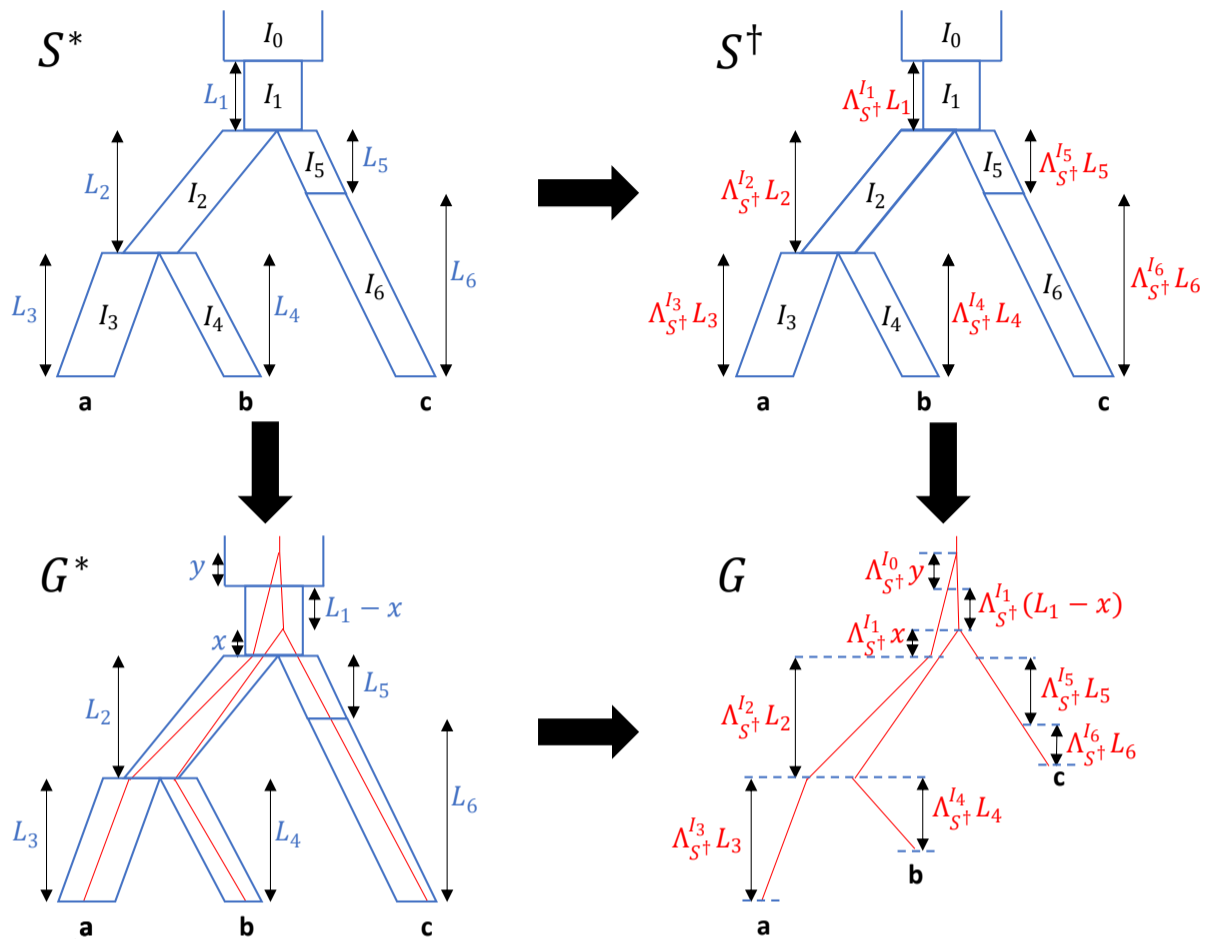

**FIG. S21.** An illustration of the process of creating a random gene tree with branch lengths in SU. Branches in the true species tree  $S^*$  are broken into intervals  $I_0 \dots I_6$ . The species tree with SU branch lengths  $S^\dagger$  is created by multiplying each branch length in  $S^*$  with a corresponding multiplier; the multipliers are jointly drawn from some distribution and are drawn independently across gene trees. Gene tree  $G^*$  is sampled under MSC process from  $S^*$  independent of  $S^\dagger$ . However, it inherits the same division of its lineages into segments as  $S^*$  at the same locations. The gene tree with SU branch lengths  $G$  is created by translating branch lengths of  $G^*$  into SU by multiplying the CU length of each of segment  $I_i$  by  $\Lambda_{S^\dagger}^{I_i}$ , the multiplier associated with the segment  $I_i$  in  $S^\dagger$  and hence  $G$ .

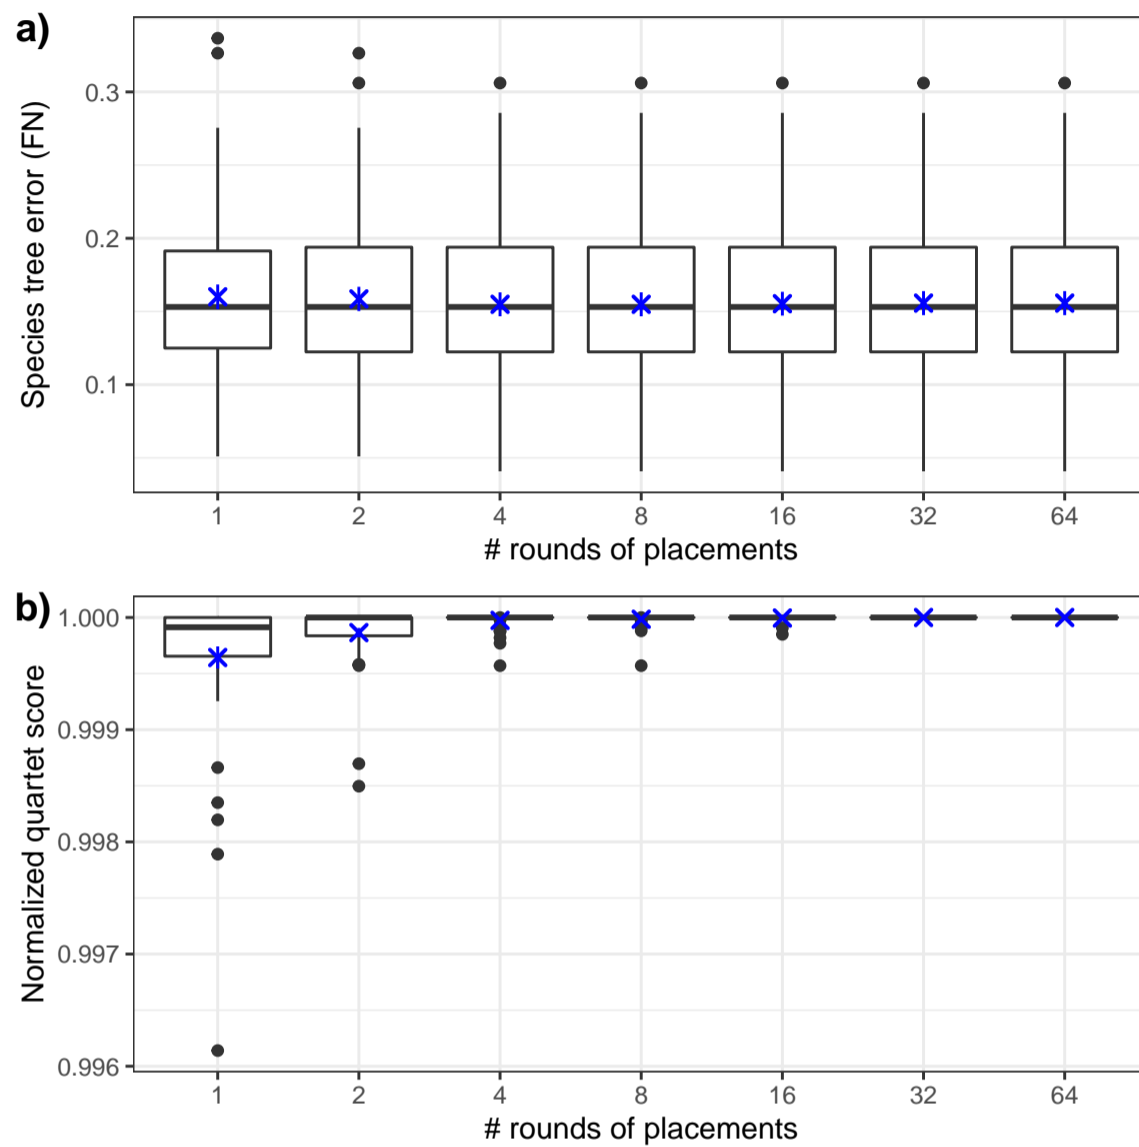

**FIG. S22.** The species tree estimation error (FN) of wASTRAL-h on S100 dataset as we change the number of rounds of placements in the base algorithm ( $r$ ). The most difficult case where gene length=200 and  $k=50$  is selected. Mean and standard error (50 replicates) are shown in blue.

## Supplementary Algorithm



---

**Algorithm S1** Recursive placement algorithm. **PLACE** inserts the species  $i$  into an existing species tree  $S$  and computes tripartition scores  $W(A|B|C, \mathcal{G}) := \sum_{G \in \mathcal{G}} W(A \cap \mathcal{L}_G | B \cap \mathcal{L}_G | C \cap \mathcal{L}_G, G)$  for all tripartitions resulting from adding  $i$  onto each branch of  $S$ . A global counter  $Q$  and a set of per-node counters  $w_A, w_B, w_C, w_{\cdot}^+, w_{\cdot}^-, w_{\cdot|\cdot}, w_{\cdot|\cdot}$  are all initialized to 0. **OptimalTreeDP** is defined in Algorithm S2. Each gene tree is rooted on an arbitrary branch  $e$  and the support of  $e$  is kept for the branch on one side of the root and zero support is given to the branch on the other side of root.  $\mathcal{L}_v$  is the set of leaves under  $v$ .

---

```

1: procedure PLACE( $i, S, \mathcal{G}$ ) ▷ Places species  $i$  on tree  $S$  according to  $\mathcal{G}$ 
2:    $W \leftarrow$  empty lookup table ▷ global variables
3:   COLORLEAFSET( $\mathcal{L}_S, C, \emptyset, \mathcal{G}, W$ ) ▷ Color all leaves of  $S$  as  $C$ 
4:   COLORLEAFSET( $\{i\}, B, \emptyset, \mathcal{G}, W$ ) ▷ Color new species  $i$  as  $B$ 
5:   COLORNODE(the root of  $S, i, S, \mathcal{G}, W$ ) ▷ Traverse  $S$  bottom up
6:    $O \leftarrow$  OPTIMALTREEDP( $\mathcal{L}_S \cup \{i\}, \mathcal{L}_S \cup \{i\}, W$ )
7:   return ( $W, O$ , edge of  $S$  onto which  $i$  is added to get  $O$ )
8: procedure COLORLEAFSET( $\mathcal{L}^*, X, T, \mathcal{G}, W$ ) ▷ Condition: Coloring  $\mathcal{L}^*$  as  $X$  should match  $T$ 
9:   for  $G \in \mathcal{G}$  do
10:    for  $j \in \mathcal{L}^* \cap \mathcal{L}_G$  do
11:       $W[T] \leftarrow$  UPDATECOUNTERS(leaf node corresponding to  $j$  in  $g, X$ )
12: procedure COLORNODE( $w, i, S, \mathcal{G}, W$ ) ▷ On start:  $i$  is  $B$ , others are  $C$ ; On exit:  $w$  is  $A$ , others kept
13:   if  $w$  is a leaf then
14:     COLORLEAFSET( $\mathcal{L}_w, A, \mathcal{L}_w | \{i\} | \mathcal{L}_S - \mathcal{L}_w, \mathcal{G}, W$ )
15:   else
16:     ( $u, v$ ) := ( the larger child of  $w$ , the smaller child of  $w$  )
17:     COLORNODE( $v, i, S, \mathcal{G}, W$ ) ▷ Recurse on  $v$ , the smaller child
18:     COLORLEAFSET( $\mathcal{L}_v, C, \emptyset, \mathcal{G}, W$ ) ▷ Undo coloring of  $v$  to enable recursing on  $u$ .
19:     COLORNODE( $u, i, S, \mathcal{G}, W$ ) ▷ Recurse on  $u$ , the large child
20:     COLORLEAFSET( $\mathcal{L}_v, B, \mathcal{L}_u | \{i\} \cup \mathcal{L}_v | \mathcal{L}_S - \mathcal{L}_w, \mathcal{G}, W$ ) ▷ Tripartition of  $w$  when adding  $i$  above  $v$ 
21:     COLORLEAFSET( $\{i\}, A, \{i\} \cup \mathcal{L}_u | \mathcal{L}_v | \mathcal{L}_S - \mathcal{L}_w, \mathcal{G}, W$ ) ▷ Tripartition of  $w$  when adding  $i$  above  $u$ 
22:     COLORLEAFSET( $\{i\}, C, \mathcal{L}_u | \mathcal{L}_v | \{i\} \cup \mathcal{L}_S - \mathcal{L}_w, \mathcal{G}, W$ ) ▷ Tripartition of  $w$  when adding  $i$  above  $w$ 
23:     COLORLEAFSET( $\{i\}, B, \emptyset, \mathcal{G}, W$ )
24:     COLORLEAFSET( $\mathcal{L}_v, A, \mathcal{L}_w | \{i\} | \mathcal{L}_S - \mathcal{L}_w, \mathcal{G}, W$ ) ▷ Tripartition of the new parent of  $i$  and  $w$ 
25: procedure RECURSIVEUPDATE( $w$ )
26:   ( $u, v, e$ ) := ( the left child of  $w$ , the right child of  $w$ , the parent branch of  $w$  )
27:   for  $(X, Y, Z) \in \{(A, B, C), (B, C, A), (C, A, B)\}$  do
28:      $Q \leftarrow Q - w_{XX|YZ}$ 
29:      $w_{XX|YZ} \leftarrow v_X u_{YZ|X} + u_X v_{YZ|X} + u_{XX|Z} v_Y + v_{XX|Z} u_Y + u_{XX|Y} v_Z + v_{XX|Y} u_Z$ 
30:        $+ (u_{YZ}^+ v_{XX}^+ - u_{YZ}^- v_{XX}^-) + (u_{XX}^+ v_{YZ}^+ - u_{XX}^- v_{YZ}^-)$ 
31:      $Q \leftarrow Q + w_{XX|YZ}$ 
32:     if  $w$  is not the root then
33:       ( $w_X, w_Y, w_Z$ )  $\leftarrow ((u_X + v_X)e^{-l(e)}, (u_Y + v_Y)e^{-l(e)}, (u_Z + v_Z)e^{-l(e)})$ 
34:        $w_{XX}^+ \leftarrow u_{XX}^+ + v_{XX}^+ + u_X v_X$ 
35:        $w_{XX}^- \leftarrow (u_{XX}^- + v_{XX}^- + u_X v_X)(1 - s(e))$ 
36:        $w_{YZ}^+ \leftarrow u_{YZ}^+ + v_{YZ}^+ + u_Y v_Z + u_Z v_Y$ 
37:        $w_{YZ}^- \leftarrow (u_{YZ}^- + v_{YZ}^- + u_Y v_Z + u_Z v_Y)(1 - s(e))$ 
38:        $w_{YZ|X} \leftarrow (u_{YZ|X} + v_{YZ|X} + (u_{YZ}^+ - u_{YZ}^-)v_X + u_X(v_{YZ}^+ - v_{YZ}^-))e^{-l(e)}$ 
39:        $w_{XX|Y} \leftarrow (u_{XX|Y} + v_{XX|Y} + (u_{XX}^+ - u_{XX}^-)v_Y + u_Y(v_{XX}^+ - v_{XX}^-))e^{-l(e)}$ 
40:        $w_{XX|Z} \leftarrow (u_{XX|Z} + v_{XX|Z} + (u_{XX}^+ - u_{XX}^-)v_Z + u_Z(v_{XX}^+ - v_{XX}^-))e^{-l(e)}$ 
41:       RECURSIVEUPDATE(the parent of  $w$ )
42: procedure UPDATECOUNTERS( $w, X$ ) ▷  $w$  is a leaf,  $X$  is a color
43:    $e :=$  the parent branch of  $w$ 
44:   ( $w_A, w_B, w_C$ )  $\leftarrow (0, 0, 0)$ 
45:    $w_X \leftarrow e^{-l(e)}$ 
46:   RECURSIVEUPDATE(the parent of  $w$ )
47:   return  $Q$ 

```

---

---

**Algorithm S2** The Algorithm S2 of  $O(n^2kH\log n)$  running time. At start, the function is called as with  $\mathcal{L}_S, \mathcal{G}, r$  as input.

---

```

1: procedure NAIVEPLACEMENT( $T, \mathcal{G}, r$ )
2:    $W^* \leftarrow$  empty lookup table from tripartitions to their weights
3:   for  $i \in \{1, \dots, r\}$  do
4:     shuffle  $T$ 
5:      $S_i \leftarrow$  tree with leaves  $T_1, T_2,$  and  $T_3$ 
6:     for  $j \in \{4, \dots, |T|\}$  do
7:        $W_i, S_i, e \leftarrow$  PLACE( $T_j, S_i, \mathcal{G}$ )
8:     Add all elements of  $W_i$  to  $W^*$ 
9:   return OPTIMALTREEDP( $T, T, W^*$ )
10: procedure OPTIMALTREEDP( $P, \mathcal{L}, W$ )
11:   if DPTree( $P$ ) available then
12:     return DPTree( $P$ )
13:   if  $|P| = 1$  then
14:     DPscore( $P$ )  $\leftarrow$  0
15:     DPTree( $P$ )  $\leftarrow$  Singleton rooted tree with leafset  $P$ 
16:   else
17:      $X \leftarrow -\infty$ 
18:     for  $A \in \{A : W[A|P - A|\mathcal{L} - P] \text{ has been computed}\}$  do
19:        $S_1 \leftarrow$  OPTIMALTREEDP( $A, \mathcal{L}, W$ )
20:        $S_2 \leftarrow$  OPTIMALTREEDP( $P - A, \mathcal{L}, W$ )
21:       if DPscore( $A$ ) + DPscore( $P - A$ ) +  $W[A|P - A|\mathcal{L} - P] > X$  then
22:          $X \leftarrow$  DPscore( $A$ ) + DPscore( $P - A$ ) +  $W[A|P - A|\mathcal{L} - P]$ 
23:         DPTree( $P$ )  $\leftarrow$  merge subtrees  $S_1$  and  $S_2$  at root
24:     DPscore( $P$ )  $\leftarrow$   $X$ 
25:   return DPTree( $P$ )

```

---

---

**Algorithm S3** The DAC algorithm of  $O(n^{1.5+\epsilon}k)$  running time given some assumptions. OptimalTreeDP and NaivePlacement are defined in Algorithm S2, and Place is defined in Algorithm S1. At start, the function is called as with  $\mathcal{L}_S, \mathcal{G}, r$  as input.

---

```

1: procedure TWOSTEPPLACEMENT( $T, \mathcal{G}, r$ )
2:    $W^* \leftarrow$  empty lookup table from tripartitions to their weights
3:   for  $i \in \{1, \dots, r\}$  do
4:      $T_i \leftarrow$  a subsample of  $T$  by removing each element independently with probability  $1 - 1/\sqrt{|T|}$ 
5:      $S_i :=$  NAIVEPLACEMENT( $T_i, \mathcal{G}, \sqrt{|T|}$ )
6:     for  $e \in E_{S_i}$  do
7:        $C_e \leftarrow$  empty list
8:       for  $j \in T - T_i$  do
9:          $W, S_o, e \leftarrow$  PLACE( $j, S_i, \mathcal{G}$ )
10:        add  $T_j$  to  $C_e$ 
11:      $C_\emptyset \leftarrow$  empty list
12:      $S'_i \leftarrow S_i$ 
13:     for  $e \in$  branches of  $S_i$  do
14:        $S_e \leftarrow S_i$ 
15:       for  $j \in C_e$  do
16:          $W, S_o, e' \leftarrow$  PLACE( $j, S_e, \mathcal{G}$ )
17:         if  $e' \in S_i - \{e\}$  then
18:           add  $j$  to  $C_\emptyset$ 
19:         else
20:            $S_e \leftarrow S_o$ 
21:        $S'_i \leftarrow$  The merger of compatible trees  $S_e$  and  $S'_i$ 
22:     for  $j \in C_\emptyset$  do
23:        $W_i, S'_i, e \leftarrow$  PLACE( $j, S'_i, \mathcal{G}$ )
24:     if  $C_\emptyset = \emptyset$  then
25:        $W_i, S'_i, e \leftarrow$  PLACE( $\emptyset, S'_i, \mathcal{G}$ )
26:     Add all elements of  $W_i$  to  $W^*$ 
27:   return OPTIMALTREEDP( $T, T, W^*$ )

```

---

## Proofs

Weighting by support: Proof of Proposition 1 and Theorem 1

For ease of reference, we reproduce Table 2 from the main paper here:

| $\mathbb{E}[(\cdot)(\cdot) \alpha_{G,Q}]$ | $\delta_G(ab cd)$                                                                        | $\delta_G(ac bd)$                                                                       |
|-------------------------------------------|------------------------------------------------------------------------------------------|-----------------------------------------------------------------------------------------|
| $\delta_{G^*}(ab cd)$                     | $\geq \frac{1}{3}(1+2\theta_Q)(\alpha_{G,Q} + \frac{1}{3}(1-\alpha_{G,Q})(1-\beta_Q))$   | $\leq \frac{1}{3}(1+2\theta_Q)(\frac{1}{3}(1-\alpha_{G,Q})(1+\beta_Q))$                 |
| $\delta_{G^*}(ac bd)$                     | $\geq \frac{1}{3}(1-\theta_Q)(\frac{1}{3}(1-\alpha_{G,Q})(1-\beta_Q))$                   | $\leq \frac{1}{3}(1-\theta_Q)(\alpha_{G,Q} + \frac{1}{3}(1-\alpha_{G,Q})(1+\beta_Q))$   |
| $\delta_{G^*}(ad bc)$                     | $\geq \frac{1}{3}(1-\theta_Q)(\frac{1}{3}(1-\alpha_{G,Q})(1-\beta_Q))$                   | $\leq \frac{1}{3}(1-\theta_Q)(\frac{1}{3}(1-\alpha_{G,Q})(1+\beta_Q))$                  |
| $\mathbb{E}[(\cdot)(\cdot) \alpha_{G,Q}]$ | $w_G(ab cd)$                                                                             | $w_G(ac bd)$                                                                            |
| $\delta_{G^*}(ab cd)$                     | $\geq \frac{1}{3}(1+2\theta_Q)(\alpha_{G,Q} + \frac{1}{3}(1-\alpha_{G,Q})(1-\beta_Q))^2$ | $\leq \frac{1}{3}(1+2\theta_Q)(\frac{1}{3}(1-\alpha_{G,Q})(1+\beta_Q))^2$               |
| $\delta_{G^*}(ac bd)$                     | $\geq \frac{1}{3}(1-\theta_Q)(\frac{1}{3}(1-\alpha_{G,Q})(1-\beta_Q))^2$                 | $\leq \frac{1}{3}(1-\theta_Q)(\alpha_{G,Q} + \frac{1}{3}(1-\alpha_{G,Q})(1+\beta_Q))^2$ |
| $\delta_{G^*}(ad bc)$                     | $\geq \frac{1}{3}(1-\theta_Q)(\frac{1}{3}(1-\alpha_{G,Q})(1-\beta_Q))^2$                 | $\leq \frac{1}{3}(1-\theta_Q)(\frac{1}{3}(1-\alpha_{G,Q})(1+\beta_Q))^2$                |

Recall that the expected value and variance of  $\alpha_{G,Q}$  across genes is denoted by  $\bar{\alpha}_Q$  and  $\sigma_\alpha^2$ .

PROPOSITION 1. For each estimated gene tree  $G$ ,  $\mathbb{E}[\delta_G(ab|cd) - \delta_G(ac|bd)] \geq \theta_Q \bar{\alpha}_Q - \frac{2}{3}(1 - \bar{\alpha}_Q)\beta_Q$  and  $\mathbb{E}[w_G(ab|cd) - w_G(ac|bd)] \geq \frac{1}{9}\theta_Q(3 + 2\beta_Q)(\bar{\alpha}_Q^2 + \sigma_\alpha^2) + \frac{2}{9}(3 - \beta_Q)\theta_Q \bar{\alpha}_Q - \frac{4}{9}(1 - \bar{\alpha}_Q)\beta_Q$ .

*Proof.* To prove the Proposition, we start with the following lemma.

LEMMA 1. For each estimated gene tree  $G$  with a given  $\alpha_{G,Q}$ ,

$$\mathbb{E}[\delta_G(ab|cd) - \delta_G(ac|bd)|\alpha_{G,Q}] \geq \theta_Q \alpha_{G,Q} - \frac{2}{3}(1 - \alpha_{G,Q})\beta_Q$$

and

$$\mathbb{E}[w_G(ab|cd) - w_G(ac|bd)|\alpha_{G,Q}] \geq \frac{1}{9}(3\alpha_{G,Q} - 2\beta_Q + 2\alpha_{G,Q}\beta_Q + 6)\theta_Q \alpha_{G,Q} - \frac{4}{9}(1 - \alpha_{G,Q})\beta_Q.$$

*Proof.* From Table 2, we can compute

$$\begin{aligned} & \mathbb{E}[\delta_G(ab|cd) - \delta_G(ac|bd)|\alpha_{G,Q}] \\ &= \mathbb{E}\left[(\delta_G(ab|cd) - \delta_G(ac|bd))(\delta_{G^*}(ab|cd) + \delta_{G^*}(ac|bd) + \delta_{G^*}(ad|bc))\right|\alpha_{G,Q}] \\ &\geq \frac{1}{3}\left((1+2\theta_Q)\alpha_{G,Q} + \frac{1}{3}(1-\alpha_{G,Q})(1-\beta_Q)\right) - \frac{1}{3}\left((1-\theta_Q)\alpha_{G,Q} + \frac{1}{3}(1-\alpha_{G,Q})(1+\beta_Q)\right) \\ &= \theta_Q \alpha_{G,Q} - \frac{2}{3}(1 - \alpha_{G,Q})\beta_Q; \end{aligned}$$

similarly,

$$\begin{aligned} & \mathbb{E}[w_G(ab|cd) - w_G(ac|bd)|\alpha_{G,Q}] \\ &= \mathbb{E}\left[(w_G(ab|cd) - w_G(ac|bd))(\delta_{G^*}(ab|cd) + \delta_{G^*}(ac|bd) + \delta_{G^*}(ad|bc))\right|\alpha_{G,Q}] \\ &\geq \frac{1}{3}(1+2\theta_Q)\alpha_{G,Q}\left(\alpha_{G,Q} + \frac{2}{3}(1-\alpha_{G,Q})(1-\beta_Q)\right) + \left(\frac{1}{3}(1-\alpha_{G,Q})(1-\beta_Q)\right)^2 \\ &\quad - \frac{1}{3}(1-\theta_Q)\alpha_{G,Q}\left(\alpha_{G,Q} + \frac{2}{3}(1-\alpha_{G,Q})(1+\beta_Q)\right) - \left(\frac{1}{3}(1-\alpha_{G,Q})(1+\beta_Q)\right)^2 \\ &\geq \frac{1}{9}(3\alpha_{G,Q} - 2\beta_Q + 2\alpha_{G,Q}\beta_Q + 6)\theta_Q \alpha_{G,Q} - \frac{4}{9}(1 - \alpha_{G,Q})\beta_Q. \end{aligned}$$

□

From this lemma, we can prove the proposition. First, assume  $\alpha_{G,Q}$  is drawn from a discrete distribution. Then,

$$\begin{aligned}\mathbb{E}[\delta_G(ab|cd) - \delta_G(ac|bd)] &= \sum_{\alpha_{G,Q}} \mathbb{E}[\delta_G(ab|cd) - \delta_G(ac|bd) | \alpha_{G,Q}] \mathbb{P}(\alpha_{G,Q}) \\ &\geq \sum_{\alpha_{G,Q}} (\theta_Q \alpha_{G,Q} - \frac{2}{3}(1 - \alpha_{G,Q})\beta_Q) \mathbb{P}(\alpha_{G,Q}) = \theta_Q \bar{\alpha}_Q - \frac{2}{3}(1 - \bar{\alpha}_Q)\beta_Q\end{aligned}$$

and

$$\begin{aligned}\mathbb{E}[w_G(ab|cd) - w_G(ac|bd)] &= \sum_{\alpha_{G,Q}} \mathbb{E}[w_G(ab|cd) - w_G(ac|bd) | \alpha_{G,Q}] \mathbb{P}(\alpha_{G,Q}) \\ &\geq \sum_{\alpha_{G,Q}} \left( \frac{1}{9}(3\alpha_{G,Q} - 2\beta_Q + 2\alpha_{G,Q}\beta_Q + 6)\theta_Q \alpha_{G,Q} - \frac{4}{9}(1 - \alpha_{G,Q})\beta_Q \right) \mathbb{P}(\alpha_{G,Q}) \\ &= \frac{1}{9}\theta_Q(3 + 2\beta_Q)\mathbb{E}[\alpha_{G,Q}^2] + \frac{2}{9}(3 - \beta_Q)\theta_Q \bar{\alpha}_Q - \frac{4}{9}(1 - \bar{\alpha}_Q)\beta_Q \\ &= \frac{1}{9}\theta_Q(3 + 2\beta_Q)(\bar{\alpha}_Q^2 + \sigma_\alpha^2) + \frac{2}{9}(3 - \beta_Q)\theta_Q \bar{\alpha}_Q - \frac{4}{9}(1 - \bar{\alpha}_Q)\beta_Q.\end{aligned}$$

It is straightforward to change these calculations to use integral instead of sum and  $\mathbb{P}(\alpha_{G,Q})$  to the PDF in the case that the distribution of  $\alpha_{G,Q}$  is continuous.  $\square$

**THEOREM 1.** *Given estimated gene trees furnished with support generated under MSC+Error+Support model, there exist conditions where (3) guarantee a statistically consistent estimator of  $S^*$  but (2) does not, and the reverse is not true.*

*Proof.* Recall that (1) states

$$W(S, \mathcal{G}) := \sum_{G \in \mathcal{G}} \sum_{Q \in \mathcal{Q}(S)} w_G(S \upharpoonright Q).$$

It means that in order to produce a statistically consistent estimator using (1), the following equation must be satisfied for the true species tree topology  $S^*$  and any species tree topology  $S$ :

$$\mathbb{E}[W(S^*, \mathcal{G}) - W(S, \mathcal{G})] = |\mathcal{G}| \sum_{Q \in \mathcal{Q}(S)} \mathbb{E}[w_G(S^* \upharpoonright Q) - w_G(S \upharpoonright Q)] \geq 0 \quad (9)$$

Notice that proving for any quartet  $Q = \{a, b, c, d\}$  we have  $\mathbb{E}[w_G(ab|cd) - w_G(ac|bd)] \geq 0$  and  $\mathbb{E}[w_G(ab|cd) - w_G(ad|bc)] \geq 0$  where  $S^* \upharpoonright Q = ab|cd$  is sufficient to prove (9); on the other hand, proving for any quartet  $Q = \{a, b, c, d\}$  where the internal branch of  $S^* \upharpoonright Q$  corresponds to only one branch in  $S^*$ , we have  $\mathbb{E}[w_G(ab|cd) - w_G(ac|bd)] \geq 0$  and  $\mathbb{E}[w_G(ab|cd) - w_G(ad|bc)] \geq 0$  where  $S^* \upharpoonright Q = ab|cd$  is necessary to prove (9).

Thus, from Proposition 1, we have guaranteed statistical consistency for wASTRAL for support under

$$D = \bigcap_{Q \in \mathcal{Q}(S)} \{(\theta_Q, \bar{\alpha}_Q, \sigma_\alpha, \beta_Q) \in [0, 1]^4 : \frac{1}{9}\theta_Q(3 + 2\beta_Q)(\bar{\alpha}_Q^2 + \sigma_\alpha^2) + \frac{2}{9}(3 - \beta_Q)\theta_Q \bar{\alpha}_Q - \frac{4}{9}(1 - \bar{\alpha}_Q)\beta_Q \geq 0\}.$$

Similarly, we have guaranteed statistical consistency for unweighted ASTRAL under

$$D' = \bigcap_{Q \in \mathcal{Q}(S)} \{(\theta_Q, \bar{\alpha}_Q, \sigma_\alpha, \beta_Q) \in [0, 1]^4 : \theta_Q \bar{\alpha}_Q - \frac{2}{3}(1 - \bar{\alpha}_Q)\beta_Q \geq 0\}.$$

To prove Theorem 1, we only need to prove that  $D'$  is a proper subset of  $D$ .

We can prove  $D' \subseteq D$ , as for any  $Q$ , if  $(\theta_Q, \bar{\alpha}_Q, \sigma_\alpha, \beta_Q) \in [0, 1]^4$  and  $\theta_Q \bar{\alpha}_Q - \frac{2}{3}(1 - \bar{\alpha}_Q)\beta_Q \geq 0$ , then

$$\begin{aligned} & \frac{1}{9}\theta_Q(3+2\beta_Q)(\bar{\alpha}_Q^2 + \sigma_\alpha^2) + \frac{2}{9}(3-\beta_Q)\theta_Q\bar{\alpha}_Q - \frac{4}{9}(1-\bar{\alpha}_Q)\beta_Q \\ &= \frac{1}{9}\theta_Q(3+2\beta_Q)\sigma_\alpha^2 + \frac{1}{3}\theta_Q(1-\theta_Q)\bar{\alpha}_Q^2 + \left(\frac{1}{3}\theta_Q\bar{\alpha}_Q + \frac{2}{3}\right)(\theta_Q\bar{\alpha}_Q - \frac{2}{3}(1-\bar{\alpha}_Q)\beta_Q) \geq 0. \end{aligned}$$

We can also prove  $D' \neq D$ , as if for some  $Q$ ,  $\theta_Q = 0.25, \bar{\alpha}_Q = 0.5, \beta_Q = 0.4$ ,

$$\theta_Q\bar{\alpha}_Q - \frac{2}{3}(1-\bar{\alpha}_Q)\beta_Q = -\frac{1}{120} < 0$$

and

$$\frac{1}{9}\theta_Q(3+2\beta_Q)(\bar{\alpha}_Q^2 + \sigma_\alpha^2) + \frac{2}{9}(3-\beta_Q)\theta_Q\bar{\alpha}_Q - \frac{4}{9}(1-\bar{\alpha}_Q)\beta_Q = \frac{7}{720} + \frac{19}{180}\sigma_\alpha^2 > 0.$$

Thus  $D'$  is a proper subset of  $D$  and we conclude the proof.

□

Weighting by length: Proof of Propositions 2 and 3 and Theorem 2

Before providing the proofs, we remind the reader of one property of the coalescent model. According to the coalescent model, at any point along a branch of the species tree with  $i$  gene tree lineages, the time (i.e., distance)  $x$  to the next coalescent event, reducing the number of lineages to  $i-1$ , is exponentially distributed with the rate  $\binom{i}{2}$ , resulting in probability density function (PDF):

$$\frac{i(i-1)}{2} e^{-\frac{i(i-1)}{2}x}, \quad (10)$$

and the two lineages that coalesce are independent of  $x$ .

PROPOSITION 2. For a true quartet species tree  $S^*$  with topology  $ab|cd$  and input gene trees  $\mathcal{G}$  generated under the naive model with any multiplier  $\lambda$ , let  $f$  be the distance between anchors of  $S^*$ . As  $f \rightarrow 0$ , given  $k = \Theta(f^{-2})$  gene trees, we have  $\text{Var}[X_G] = \Theta_f(1)$  and

$$\frac{\mathbb{E}[X_G]}{\sqrt{\text{Var}[X_G]}} = \frac{1+4\lambda}{1+2\lambda} \sqrt{\frac{3}{2}} f + O(f^2).$$

*Proof.* We analyze balanced and unbalanced trees separately.

Case 1: Unbalanced trees (i.e., the root of  $S^*$  has a terminal branch as a child). W.o.l.g., we assume the root branch is located on branch leading to  $d$ .

Let  $p, q$ , and  $r$  be the MRCA nodes of  $(a, b)$ ,  $(a, c)$ , and  $(a, d)$  on rooted species tree  $S^*$ , respectively. Let  $p'$  and  $r'$  be the points of coalescence of leaves  $a, b$  and leaves  $c, d$  on the rooted gene tree  $G$ , respectively. Let  $x, y_0$ , and  $z$  be the CU difference in heights of points  $(p, p')$ ,  $(q, r)$ , and  $(r, r')$ , respectively. Note that  $f$  is the length of  $(p, q)$ . Let  $L := l_{S^*}(a, p) + l_{S^*}(b, p) + l_{S^*}(c, r) + l_{S^*}(d, r)$ . Notice that  $l_G(a, p) + l_G(b, p) + l_G(c, r) + l_G(d, r) = \lambda L$  and  $l_G(a, b) + l_G(c, d) = \lambda(2x + 2z + L)$ .

Let  $f_X(x)$  be the probability density that  $x$  is the CU difference in heights of  $(p, p')$  and  $p'$  is the lowest point of coalescence. Notice that by (10):

$$f_X(x) = \begin{cases} e^{-x} & 0 \leq x \leq f \\ \frac{1}{\binom{2}{3}} \left( e^{-f} \binom{2}{3} e^{-\binom{2}{3}(x-f)} \right) = e^{-3x+2f} & f \leq x \leq f + y_0 \\ \frac{1}{\binom{2}{4}} \left( e^{-f} e^{-\binom{2}{3}y_0} \binom{2}{4} e^{-\binom{2}{4}(x-f-y_0)} \right) = e^{-6x+5f+3y_0} & f + y_0 \leq x \end{cases}$$

Let  $f_{Z|X}(z; x)$  be the probability density that  $z$  is the CU difference in heights of  $(r, r')$ , conditioned on that  $x$  is the CU difference in heights of  $(p, p')$  and  $p'$  is the lowest point of coalescence. Notice that:

$$f_{Z|X}(z; x) = \begin{cases} e^{-z} & 0 \leq x \leq f + y_0 \text{ and } 0 \leq z \\ e^{-(z-(x-f-y_0))} = e^{-z+x-f-y_0} & 0 \leq x - f - y_0 \leq z \end{cases}$$

We specify three coalescence scenarios by indicator functions  $\delta_1, \delta_2, \delta_3$ : *i*)  $\delta_1$  indicates  $0 \leq x < f$ ; *ii*)  $\delta_2$  indicates  $f \leq x < f + y_0$ ; *iii*)  $\delta_3$  indicates  $f + y_0 \leq x$ .

Note that

$$\begin{aligned} \mathbb{E}[w_G(ab|cd)] &= \mathbb{E}[(\delta_1 + \delta_2 + \delta_3)w_G(ab|cd)] \\ \mathbb{E}[w_G^2(ab|cd)] &= \mathbb{E}[(\delta_1 + \delta_2 + \delta_3)w_G^2(ab|cd)]. \end{aligned}$$

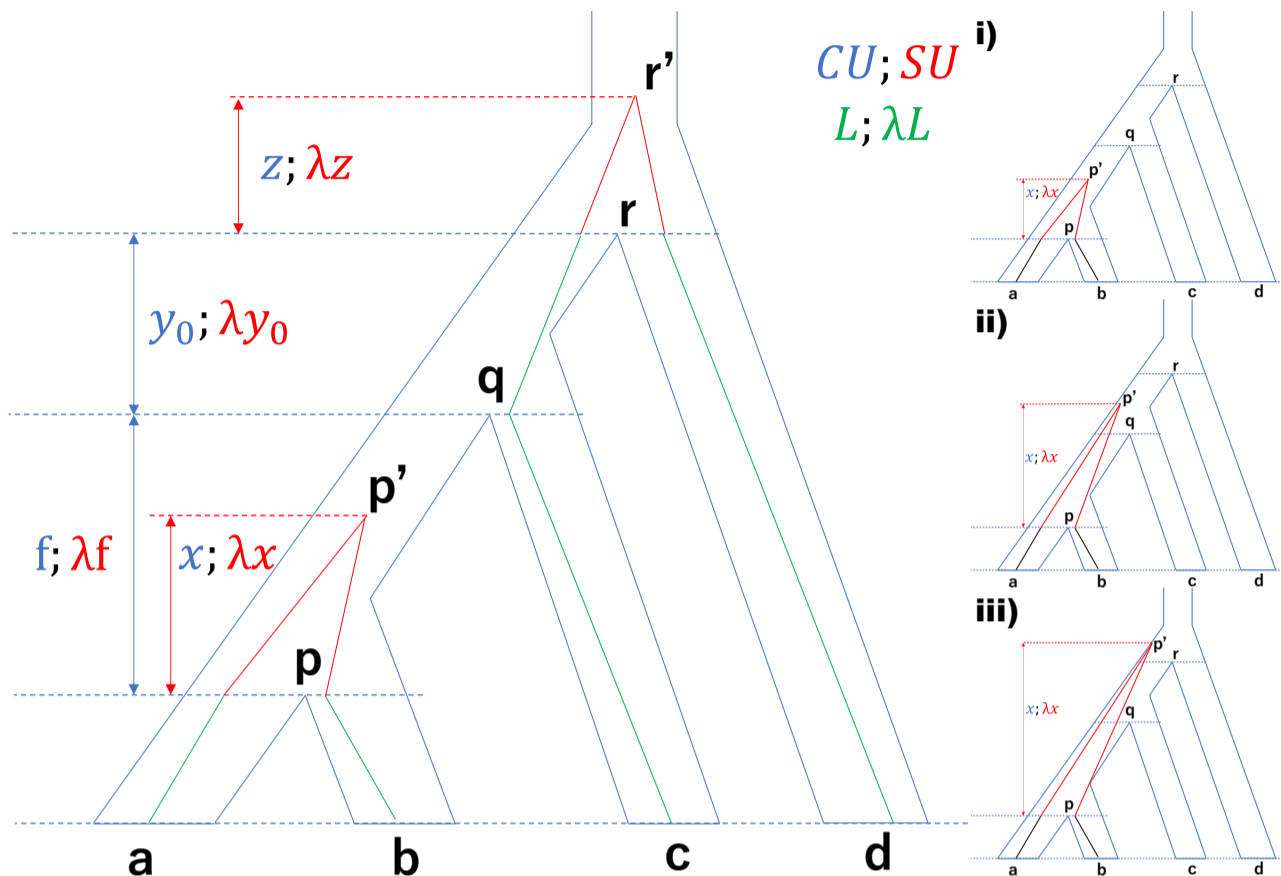

FIG. S23. Illustration of the unbalanced case. Lengths in CU/SU units are denoted in blue/red. Branches in green have a total length  $L/\lambda L$  in CU/SU units. The right-hand side shows the position of  $p'$  in relation to  $q$  and  $r$  in various cases.

Similarly, since only scenarios 2 and 3 have deep coalescence events that may lead to gene tree disagreement with the species tree, and by the symmetry of all three topologies under scenarios 2 and 3,

$$\begin{aligned}\mathbb{E}[w_G(ac|bd)] &= \mathbb{E}[(\delta_2 + \delta_3)w_G(ab|cd)] \\ \mathbb{E}[w_G^2(ac|bd)] &= \mathbb{E}[(\delta_2 + \delta_3)w_G^2(ab|cd)].\end{aligned}$$

Thus,

$$\mathbb{E}[X_G] = \mathbb{E}[w_G(ab|cd)] - \mathbb{E}[w_G(ac|bd)] = \mathbb{E}[\delta_1 w_G(ab|cd)], \quad (11)$$

and since  $w_G(ab|cd)w_G(ac|bd) = 0$ ,

$$\begin{aligned}\text{Var}[X_G] &= \mathbb{E}[X_G^2] - \mathbb{E}^2[X_G] = \mathbb{E}[w_G^2(ab|cd) + w_G^2(ac|bd)] - \mathbb{E}^2[X_G] \\ &= \mathbb{E}[(\delta_1 + 2\delta_2 + 2\delta_3)w_G^2(ab|cd)] - \mathbb{E}^2[X_G].\end{aligned} \quad (12)$$

We next compute both elements of (11) as well as some elements of (12) (others will not be necessary).

- $\delta_1$ : When  $G$  has topology  $ab|cd$ ,  $p'$  must be the lowest point of coalescence. Thus,

$$\begin{aligned}\mathbb{E}[\delta_1 w_G(ab|cd)] &= \int_0^f \int_0^{+\infty} e^{-\lambda(2x+2z+L)} f_X(x) f_{Z|X}(z;x) dz dx \\ &= \int_0^f \int_0^{+\infty} e^{-\lambda(2x+2z+L)} e^{-x} e^{-z} dz dx \\ &= \frac{e^{-\lambda L} (1 - e^{-(1+2\lambda)f})}{(1+2\lambda)^2};\end{aligned}$$



$$\mathbb{E}[\delta_1 w_G^2(ab|cd)] \leq \mathbb{E}[\delta_1 w_G(ab|cd)] = O(f).$$

- $\delta_2$ : When  $G$  has topology  $ab|cd$ ,  $p'$  must be the lowest point of coalescence. Thus,

$$\begin{aligned} \mathbb{E}[\delta_2 w_G^2(ab|cd)] &= \int_f^{f+y_0} \int_0^{+\infty} e^{-\lambda(4x+4z+2L)} f_X(x) f_{Z|Y}(z;y) dz dx \\ &= \int_f^{f+y_0} \int_0^{+\infty} e^{-\lambda(4x+4z+2L)} e^{-3x+2f} e^{-z} dz dx \\ &= \frac{1 - e^{-(3+4\lambda)y_0}}{(1+4\lambda)(3+4\lambda)} e^{-(1+4\lambda)f - 2\lambda L}. \end{aligned}$$

- $\delta_3$ : When  $G$  has the topology  $ab|cd$ , either  $p'$  or  $q'$  must be the lowest point of coalescence, and by symmetry, the two cases must have the same PDFs. Thus,

$$\begin{aligned} \mathbb{E}[\delta_3 w_G^2(ab|cd)] &= \int_{f+y_0}^{+\infty} \int_{x-f-y_0}^{+\infty} e^{-\lambda(4x+4z+2L)} 2f_X(x) f_{Z|X}(z;x) dz dx \\ &= \int_{f+y_0}^{+\infty} \int_{x-f-y_0}^{+\infty} e^{-\lambda(4x+4z+2L)} 2e^{-6x+5f+3y_0} e^{-z+x-f-y_0} dz dx \\ &= \int_{f+y_0}^{+\infty} e^{-4\lambda(x+x-f-y_0)-2\lambda L} 2e^{-6x+5f+3y_0} \frac{1}{1+4\lambda} dx \\ &= \frac{1}{(3+4\lambda)(1+4\lambda)} e^{-(1+4\lambda)f - (3+4\lambda)y_0 - 2\lambda L}. \end{aligned}$$

Replacing in (11), we get

$$\mathbb{E}[X_G] = \mathbb{E}[\delta_1 w_G(ab|cd)] = \frac{e^{-\lambda L} (1 - e^{-(1+2\lambda)f})}{(1+2\lambda)^2} = \frac{e^{-\lambda L}}{1+2\lambda} f + O(f^2);$$

and replacing in (12), we get

$$\begin{aligned} \text{Var}[X_G] &= \mathbb{E}[(\delta_1 + 2\delta_2 + 2\delta_3) w_G^2(ab|cd)] - \mathbb{E}^2[X_G] = \mathbb{E}[2(\delta_2 + \delta_3) w_G^2(ab|cd)] + O(f) \\ &= \frac{2e^{-(1+4\lambda)f - 2\lambda L}}{(3+4\lambda)(1+4\lambda)} + O(f) = \frac{2e^{-2\lambda L}}{(3+4\lambda)(1+4\lambda)} + O(f), \end{aligned}$$

from which our assumption of  $\text{Var}[X_G] = \Omega(1)$  follows.

Case 2: Balanced tree.

Let  $p, q$ , and  $r$  be the MRCA nodes of  $(a, b)$ ,  $(c, d)$ , and  $(a, d)$  on rooted species tree  $S^*$ , respectively. Let  $p'$  and  $q'$  be the points of coalescence of leaves  $a, b$  and leaves  $c, d$  on the rooted gene tree  $G$ , respectively. Let  $x, x_0, y$ , and  $y_0$  be the CU difference in heights of points  $(p, p')$ ,  $(p, r)$ ,  $(q, q')$ , and  $(q, r)$ , respectively. Note that  $f = x + y$  is CU length of path  $(p, q)$ . Let  $L := l_{S^*}(a, p) + l_{S^*}(b, p) + l_{S^*}(c, q) + l_{S^*}(d, q)$ . Notice that  $l_G(a, p) + l_G(b, p) + l_G(c, q) + l_G(d, q) = \lambda L$  and  $l_G(a, b) + l_G(c, d) = \lambda(2x + 2y + L)$ .

We specify three coalescence scenarios by indicator functions  $\delta_1, \delta_2, \delta_3$ : *i*)  $\delta_1$  indicates  $0 \leq x < x_0$ ; *ii*)  $\delta_2$  indicates  $x_0 \leq x, 0 \leq y < y_0$ ; *iii*)  $\delta_3$  indicates  $x_0 \leq x, y_0 \leq y$ .

Note that

$$\begin{aligned} \mathbb{E}[w_G(ab|cd)] &= \mathbb{E}[(\delta_1 + \delta_2 + \delta_3) w_G(ab|cd)] \\ \mathbb{E}[w_G^2(ab|cd)] &= \mathbb{E}[(\delta_1 + \delta_2 + \delta_3) w_G^2(ab|cd)]. \end{aligned}$$

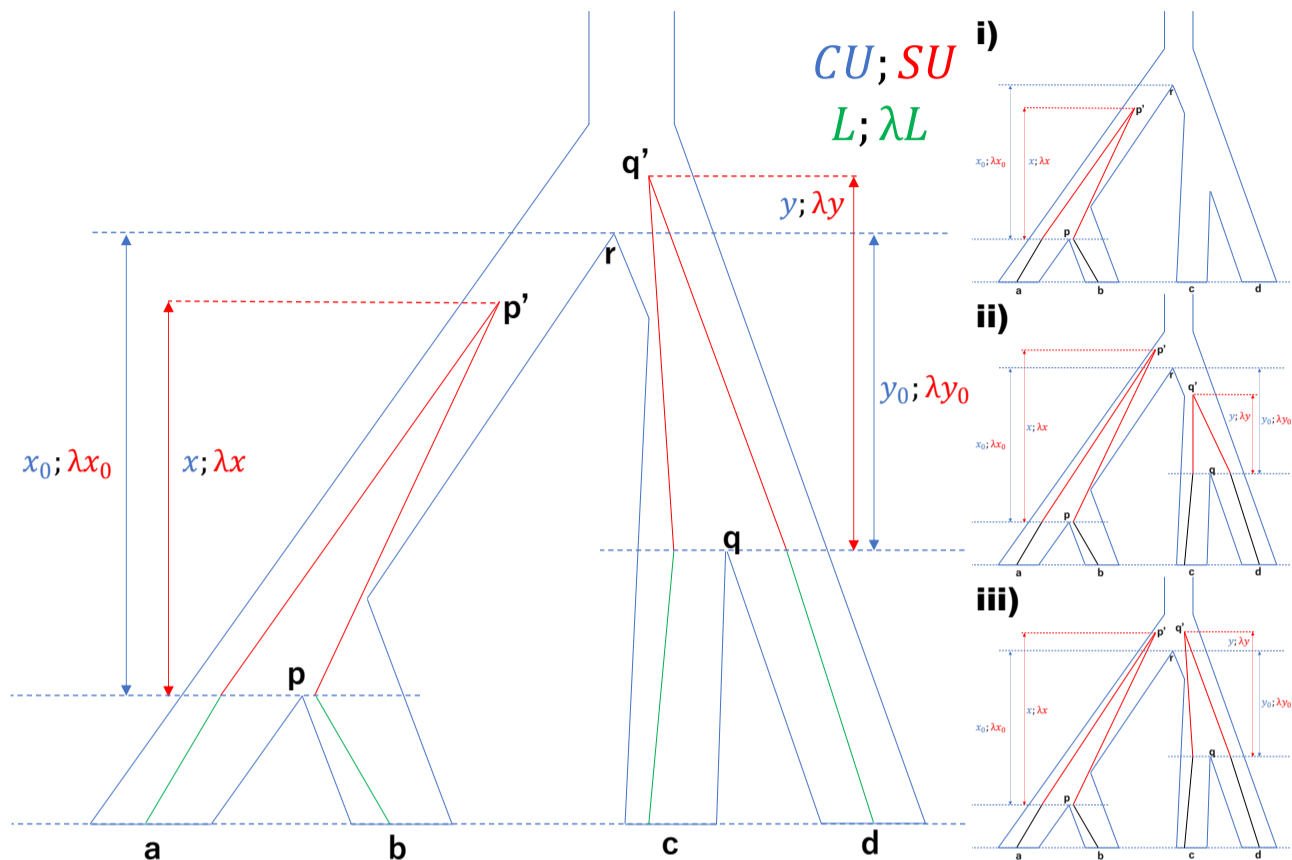

**FIG. S24.** Illustration of the unbalanced case. Lengths in CU/SU units are denoted in blue/red. Branches in green have a total length  $L/\lambda L$  in CU/SU units. The right-hand side shows the position of  $p'$  and  $q'$  in relation to  $r$  in various cases.

Similarly, since only scenarios 3 have deep coalescence events that may lead to gene tree disagreement with the species tree, and by the symmetry of all three topologies under scenarios 3,

$$\begin{aligned}\mathbb{E}[w_G(ac|bd)] &= \mathbb{E}[\delta_3 w_G(ab|cd)] \\ \mathbb{E}[w_G^2(ac|bd)] &= \mathbb{E}[\delta_3 w_G^2(ab|cd)].\end{aligned}$$

Thus,

$$\mathbb{E}[X_G] = \mathbb{E}[w_G(ab|cd)] - \mathbb{E}[w_G(ac|bd)] = \mathbb{E}[(\delta_1 + \delta_2)w_G(ab|cd)]; \quad (13)$$

and since  $w_G(ab|cd)w_G(ac|bd) = 0$ ,

$$\begin{aligned}\text{Var}[X_G] &= \mathbb{E}[X_G^2] - \mathbb{E}^2[X_G] = \mathbb{E}[w_G^2(ab|cd) + w_G^2(ac|bd)] - \mathbb{E}^2[X_G] \\ &= \mathbb{E}[(\delta_1 + \delta_2 + 2\delta_3)w_G^2(ab|cd)] - \mathbb{E}^2[X_G].\end{aligned} \quad (14)$$

- $\delta_1$ : Here,

$$\begin{aligned}\mathbb{E}[\delta_1 w_G(ab|cd)] &= \int_0^{x_0} \int_0^{+\infty} e^{-\lambda(2x+2y+L)} e^{-x} e^{-y} dy dx \\ &= \frac{e^{-\lambda L}(1 - e^{-(1+2\lambda)x_0})}{(1+2\lambda)^2} = \frac{e^{-\lambda L} x_0}{1+2\lambda} + O(x_0^2) = \frac{e^{-\lambda L} x_0}{1+2\lambda} + O(f^2);\end{aligned}$$

and

$$\mathbb{E}[\delta_1 w_G^2(ab|cd)] \leq \mathbb{E}[\delta_1 w_G(ab|cd)] = O(f).$$

- $\delta_2$ : Here,

$$\begin{aligned}\mathbb{E}[\delta_2 w_G(ab|cd)] &= \int_{x_0}^{+\infty} \int_0^{y_0} e^{-\lambda(2x+2y+L)} e^{-x} e^{-y} dy dx \\ &= \frac{e^{-\lambda L} (1 - e^{-(1+2\lambda)y_0}) e^{-(1+2\lambda)x_0}}{(1+2\lambda)^2} = \frac{e^{-\lambda L} y_0}{1+2\lambda} + O(f^2);\end{aligned}$$

and

$$\mathbb{E}[\delta_2 w_G^2(ab|cd)] \leq \mathbb{E}[\delta_2 w_G(ab|cd)] = O(f).$$

- $\delta_3$ : Similar to the unbalanced case, when  $G$  has the topology  $ab|cd$ , either  $p'$  or  $q'$  must be the lowest point of coalescence, and by symmetry, the two cases must have the same PDFs. Thus,

$$\begin{aligned}\mathbb{E}[\delta_3 w_G^2(ab|cd)] &= \int_{x_0}^{+\infty} \int_{x-x_0+y_0}^{+\infty} e^{-\lambda(4x+4y+2L)} 2e^{-x_0} e^{-y_0} e^{-6x+6x_0} e^{-y+x-x_0+y_0} dy dx \\ &= \int_{x_0}^{+\infty} e^{-4\lambda(x+x-x_0+y_0)-2\lambda L} 2e^{-x_0} e^{-y_0} e^{-6x+6x_0} \frac{1}{1+4\lambda} dx \\ &= \frac{1}{(3+4\lambda)(1+4\lambda)} e^{-(1+4\lambda)(x_0+y_0)-2\lambda L} = \frac{1}{(3+4\lambda)(1+4\lambda)} e^{-(1+4\lambda)f-2\lambda L}.\end{aligned}$$

Replacing in (13), we get

$$\mathbb{E}[X_G] = \mathbb{E}[(\delta_1 + \delta_2)w_G(ab|cd)] = \frac{e^{-\lambda L}(x_0 + y_0)}{1+2\lambda} + O(f^2) = \frac{e^{-\lambda L}f}{1+2\lambda} + O(f^2);$$

and replacing in (14), we get

$$\begin{aligned}\text{Var}[X_G] &= \mathbb{E}[(\delta_1 + \delta_2 + 2\delta_3)w_G^2(ab|cd)] - \mathbb{E}^2[X_G] \\ &= \mathbb{E}[2\delta_3 w_G^2(ab|cd)] + O(f) \\ &= \frac{2e^{-(1+4\lambda)f-2\lambda L}}{(3+4\lambda)(1+4\lambda)} + O(f) = \frac{2e^{-2\lambda L}}{(3+4\lambda)(1+4\lambda)} + O(f),\end{aligned}$$

from which our assumption of  $\text{Var}[X_G] = \Theta_f(1)$  follows.

Thus, in both balanced and unbalanced cases,

$$\frac{\mathbb{E}[X_G]}{\sqrt{\text{Var}[X_G]}} = \frac{\frac{e^{-\lambda L}f}{1+2\lambda} + O(f^2)}{\sqrt{\frac{2e^{-2\lambda L}}{(1+4\lambda)(3+4\lambda)} + O(f)}} = \sqrt{1 + \frac{4\lambda + 4\lambda^2}{3(1+2\lambda)^2}} \sqrt{\frac{3}{2}} f + O(f^2)$$

□

**PROPOSITION 3.** For a true quartet species tree  $S^*$  with topology  $ab|cd$  and input gene trees  $\mathcal{G}$  generated under the variable rate model, let  $f$  be the distance between anchors of  $S^*$  and  $L$  be the total length of all other branches. Assume that for every branch segment  $I$ , the variance of its multiplier is bounded above:  $\text{Var}(\Lambda_{S^*}^I) \leq \varepsilon^2$  where  $\varepsilon^2 = \frac{e^{-\lambda L}}{(16+32\lambda)+(6+32\lambda+32\lambda^2)L} \left(\frac{20(\lambda+\lambda^2)}{9(1+2\lambda)^2}\right)^3$ . As  $f \rightarrow 0$ , given  $k = \Theta(f^{-2})$  gene trees, we have  $\text{Var}[X_G] = \Theta_f(1)$  and

$$\frac{\mathbb{E}[X_G]}{\sqrt{\text{Var}[X_G]}} \geq \sqrt{\frac{3}{2}} \left(1 - \frac{4\lambda^2}{(1+4\lambda)^2}\right)^{-\frac{1}{2}} f + O(f^2).$$

*Proof.* We follow the same logic in proof of Proposition 2.

Case 1: Unbalanced trees. Let  $P(x)$  be functions to random variables denoting SU difference in heights of points  $(p, p')$  where  $p'$  is  $x$  CU distance above  $p$ ; let  $R(z)$  be functions to random variables denoting SU difference in heights of points  $(r, r')$  where  $r'$  is  $z$  CU distance above  $r$ . Note that  $P(f+y_0)+R(z)=P(f+y_0+z)$  where  $P(f+y_0)$  denote the SU length of  $(p, r)$ . Let random variable  $\Lambda := (l_{S^\dagger}(a, p) + l_{S^\dagger}(b, p) + l_{S^\dagger}(c, r) + l_{S^\dagger}(d, r))$  be the total SU terminal branch lengths and the constant value  $L$  be the CU distance corresponding to  $\Lambda$ .

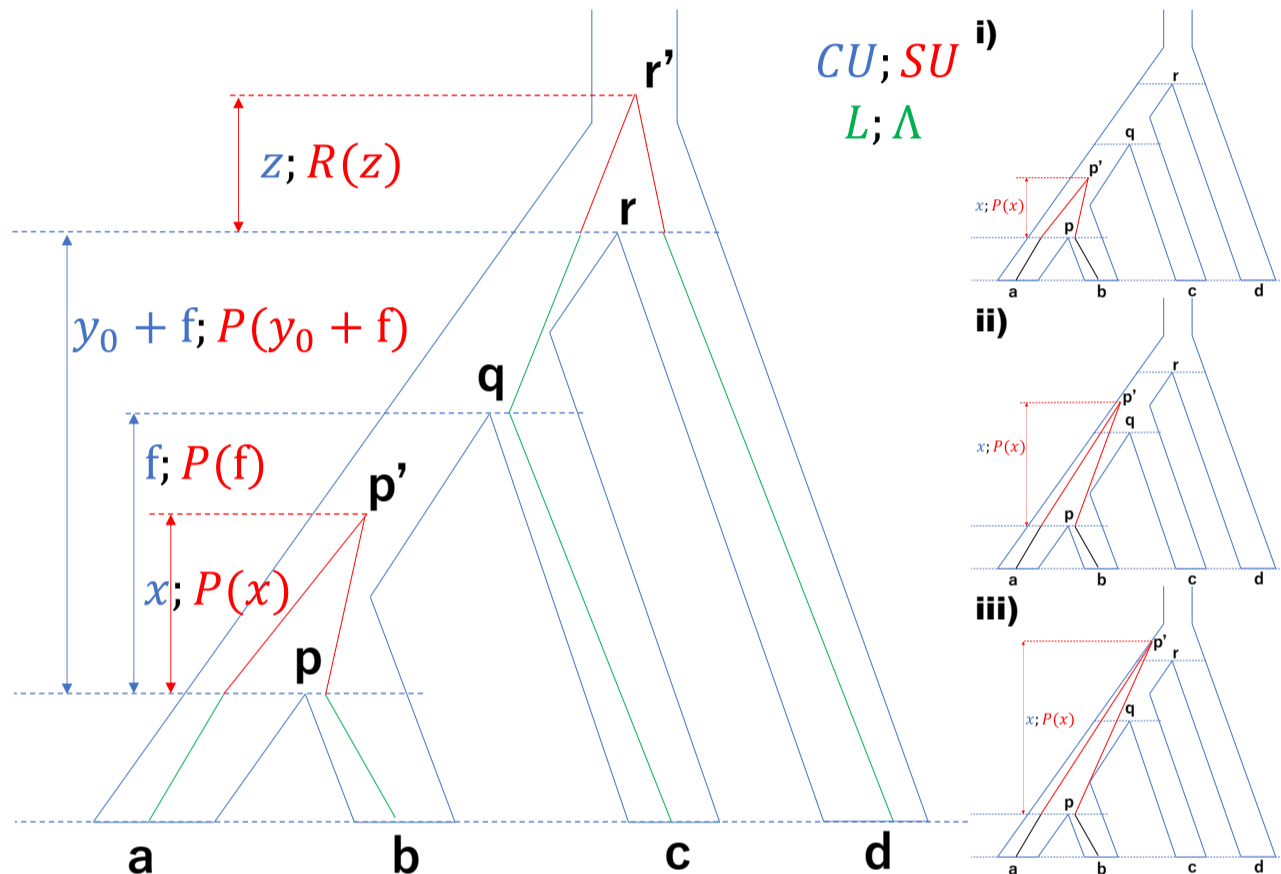

FIG. S25. Illustration of the unbalanced case. Lengths in CU/SU units are denoted in blue/red. Branches in green have a total length  $L/\Lambda$  in CU/SU units. The right-hand side shows the position of  $p'$  in relation to  $q$  and  $r$  in various cases.

- $\delta_1$ : When  $G$  has topology  $ab|cd$ ,  $p'$  must be the lowest point of coalescence. Thus,

$$\begin{aligned}
& \mathbb{E}[\delta_1 w_G(ab|cd)] \\
&= \mathbb{E}\left[\int_0^f \int_0^{+\infty} e^{-2P(x)-2R(z)-\Lambda} f_X(x) f_{Z|X}(z;x) dz dx\right] \\
&= \mathbb{E}\left[\int_0^f \int_0^{+\infty} e^{-2P(x)-2R(z)-\Lambda} e^{-x} e^{-z} dz dx\right] \\
&= \mathbb{E}\left[\int_0^f \int_0^{+\infty} e^{-2P(x)-2R(z)-\Lambda-x-z} dz dx\right];
\end{aligned}$$

and

$$\mathbb{E}[\delta_1 w_G^2(ab|cd)] \leq \mathbb{E}[\delta_1 w_G(ab|cd)] = O(f).$$

- $\delta_2$ : When  $G$  has topology  $ab|cd$ ,  $p'$  must be the lowest point of coalescence. Thus,

$$\begin{aligned}
& \mathbb{E}[\delta_2 w_G^2(ab|cd)] \\
&= \mathbb{E}\left[\int_f^{f+y_0} \int_0^{+\infty} e^{-4P(x)-4R(z)-2\Lambda} f_X(x) f_{Z|Y}(z;y) dz dx\right] \\
&= \mathbb{E}\left[\int_f^{f+y_0} \int_0^{+\infty} e^{-4P(x)-4R(z)-2\Lambda} e^{-3x+2f} e^{-z} dz dx\right] \\
&= \int_f^{f+y_0} \int_0^{+\infty} \mathbb{E}[e^{-4P(x)-4R(z)-2\Lambda}] e^{-3x-z+2f} dz dx.
\end{aligned}$$

- $\delta_3$ : When  $G$  has the topology  $ab|cd$ , either  $p'$  or  $q'$  must be the lowest point of coalescence, and by symmetry, the two cases must have the same PDFs. Thus,

$$\begin{aligned}
& \mathbb{E}[\delta_3 w_G^2(ab|cd)] \\
&= \mathbb{E}\left[\int_{f+y_0}^{+\infty} \int_{x-f-y_0}^{+\infty} e^{-4P(x)-4R(z)-2\Lambda} 2f_X(x) f_{Z|X}(z;x) dz dx\right] \\
&= \mathbb{E}\left[\int_{f+y_0}^{+\infty} \int_{x-f-y_0}^{+\infty} e^{-4P(x)-4R(z)-2\Lambda} 2e^{-6x+5f+3y_0} e^{-z+x-f-y_0} dz dx\right] \\
&= \int_{f+y_0}^{+\infty} \int_{x-f-y_0}^{+\infty} \mathbb{E}[e^{-4P(x)-4R(z)-2\Lambda}] 2e^{-5x-z+4f+2y_0} dz dx.
\end{aligned}$$

Replacing in (11), by Jensen's inequality, we get

$$\begin{aligned}
\mathbb{E}[X_G] &= \mathbb{E}[\delta_1 w_G(ab|cd)] = \mathbb{E}\left[\int_0^f \int_0^{+\infty} e^{-2P(x)-2R(z)-\Lambda-x-z} dz dx\right] \\
&\geq \int_0^f \int_0^{+\infty} e^{-2P(x)-2R(z)-\Lambda-x-z} dz dx \\
&= \int_0^f \int_0^{+\infty} e^{-2\lambda x-2\lambda z-\lambda L-x-z} dz dx \\
&= \frac{e^{-\lambda L}(1-e^{-(1+2\lambda)f})}{(1+2\lambda)^2} = \frac{e^{-\lambda L}}{1+2\lambda} f + O(f^2).
\end{aligned}$$

And replacing in (12), we get

$$\begin{aligned}
\text{Var}[X_G] &= \mathbb{E}[(\delta_1 + 2\delta_2 + 2\delta_3)w_G^2(ab|cd)] - \mathbb{E}^2[X_G] = \mathbb{E}[2(\delta_2 + \delta_3)w_G^2(ab|cd)] + O(f) \\
&= \int_f^{f+y_0} \int_0^{+\infty} \mathbb{E}[e^{-4P(x)-4R(z)-2\Lambda}] 2e^{-3x-z+2f} dz dx \\
&\quad + \int_{f+y_0}^{+\infty} \int_{x-f-y_0}^{+\infty} \mathbb{E}[e^{-4P(x)-4R(z)-2\Lambda}] 4e^{-5x-z+2f+2y_0} dz dx + O(f),
\end{aligned}$$

from which our assumption of  $\text{Var}[X_{G^*}] = \Theta_f(1)$  follows.

Let  $F_P(u;x)$ ,  $F_R(v;z)$ , and  $F_\Lambda(w)$  be the CDF of  $P(x)$ ,  $R(z)$ , and  $\Lambda$  respectively; let  $F_{PRA}(u,v,w;x,z)$  and  $F_{PRA}(u,v,w;x,z)$  be the joint CDF and the joint PDF. Let  $F_P^{-1}(t;x)$ ,  $F_R^{-1}(t;z)$ , and  $F_\Lambda^{-1}(t)$  be the inverse function of CDF of  $P(x)$ ,  $R(z)$ , and  $\Lambda$  respectively.

Then,

$$\begin{aligned}
& \mathbb{E} \left[ e^{-2(2P(x)+2R(z)+\Lambda)} \right] \\
&= \int_0^{+\infty} \int_0^{+\infty} \int_0^{+\infty} e^{-2(2u+2v+w)} F_{PRA}(u, v, w; x, z) dw dv du \\
&= \int_0^{+\infty} \int_0^{+\infty} \int_0^{+\infty} e^{-2(2u+2v+w)} \frac{\partial^3 F_{PRA}}{\partial u \partial v \partial w} dw dv du \\
&= \int_0^{+\infty} \int_0^{+\infty} \left( e^{-2(2u+2v+w)} \frac{\partial^2 F_{PRA}}{\partial u \partial v} \Big|_{w=0}^{+\infty} \right. \\
&\quad \left. - \int_0^{+\infty} (-2) e^{-2(2u+2v+w)} \frac{\partial^2 F_{PRA}}{\partial u \partial v} dw \right) dv du \\
&= \int_0^{+\infty} \int_0^{+\infty} \int_0^{+\infty} 2e^{-2(2u+2v+w)} \frac{\partial^2 F_{PRA}}{\partial u \partial v} dv du dw \\
&= \int_0^{+\infty} \int_0^{+\infty} \left( 2e^{-2(2u+2v+w)} \frac{\partial F_{PRA}}{\partial u} \Big|_{v=0}^{+\infty} - \int_0^{+\infty} (-8) e^{-2(2u+2v+w)} \frac{\partial F_{PRA}}{\partial u} dv \right) du dw \\
&= \int_0^{+\infty} \int_0^{+\infty} \int_0^{+\infty} 8e^{-2(2u+2v+w)} \frac{\partial F_{PRA}}{\partial u} du dw dv \\
&= \int_0^{+\infty} \int_0^{+\infty} \left( 8e^{-2(2u+2v+w)} F_{PRA}(u, v, w; x, z) \Big|_{u=0}^{+\infty} \right. \\
&\quad \left. - \int_0^{+\infty} (-32) e^{-2(2u+2v+w)} F_{PRA}(u, v, w; x, z) du \right) dw dv \\
&= \int_0^{+\infty} \int_0^{+\infty} \int_0^{+\infty} 32e^{-2(2u+2v+w)} F_{PRA}(u, v, w; x, z) dw dv du \\
&\leq \int_0^{+\infty} \int_0^{+\infty} \int_0^{+\infty} 32e^{-2(2u+2v+w)} \min\{F_P(u; x), F_R(v; z), F_\Lambda(w)\} dw dv du \\
&= \int_0^{+\infty} \int_0^{+\infty} \int_0^{+\infty} 32e^{-2(2u+2v+w)} \left( \int_0^1 1_{t \leq F_P(u; x)} 1_{t \leq F_R(v; z)} 1_{t \leq F_\Lambda(w)} dt \right) dw dv du \\
&= \int_0^1 \int_0^{+\infty} \int_0^{+\infty} \int_0^{+\infty} 32e^{-2(2u+2v+w)} 1_{u \geq F_P^{-1}(t; x)} 1_{v \geq F_R^{-1}(t; z)} 1_{w \geq F_\Lambda^{-1}(t)} dw dv du dt \\
&= \int_0^1 \int_{F_P^{-1}(t; x)}^{+\infty} \int_{F_R^{-1}(t; z)}^{+\infty} \int_{F_\Lambda^{-1}(t)}^{+\infty} 32e^{-2(2u+2v+w)} dw dv du dt \\
&= \int_0^1 e^{-2(2F_P^{-1}(t; x) + 2F_R^{-1}(t; z) + F_\Lambda^{-1}(t))} dt.
\end{aligned}$$

Thus, for any  $0 < t_0 < 1$ ,

$$\begin{aligned}
& \mathbb{E} \left[ e^{-2(2P(x)+2R(z)+\Lambda)} \right] \\
&\leq \int_0^1 e^{-2(2F_P^{-1}(t; x) + 2F_R^{-1}(t; z) + F_\Lambda^{-1}(t))} dt \\
&\leq \int_0^{t_0} \overbrace{e^{-2(2F_P^{-1}(0; x) + 2F_R^{-1}(0; z) + F_\Lambda^{-1}(0))}}^1 dt + \int_{t_0}^1 e^{-2(2F_P^{-1}(t_0; x) + 2F_R^{-1}(t_0; z) + F_\Lambda^{-1}(t_0))} dt \\
&\leq t_0 + e^{-2(2F_P^{-1}(t_0; x) + 2F_R^{-1}(t_0; z) + F_\Lambda^{-1}(t_0))}.
\end{aligned}$$

By Chebyshev's inequality (using  $t_0^{-\frac{1}{2}}$  as the constant),  $F_P^{-1}(t_0; x) \geq (\lambda - \frac{\varepsilon}{\sqrt{t_0}})x$ ,  $F_R^{-1}(t_0; z) \geq (\lambda - \frac{\varepsilon}{\sqrt{t_0}})y$ , and  $F_\Lambda^{-1}(t_0) \geq (\lambda - \frac{\varepsilon}{\sqrt{t_0}})L$ . Thus,

$$\mathbb{E} \left[ e^{-2(2P(x)+2R(z)+\Lambda)} \right] \leq t_0 + e^{(-\lambda + \frac{\varepsilon}{\sqrt{t_0}})(4x+4z+2L)}.$$

Thus,

$$\begin{aligned}
\text{Var}[X_{G^*}] &\leq \int_f^{f+y_0} \int_0^{+\infty} \left( t_0 + e^{(-\lambda + \frac{\varepsilon}{\sqrt{t_0}})(4x+4z+2L)} \right) 2e^{-3x-z+2f} dz dx \\
&\quad + \int_{f+y_0}^{+\infty} \int_{x-f-y_0}^{+\infty} \left( t_0 + e^{(-\lambda + \frac{\varepsilon}{\sqrt{t_0}})(4x+4z+2L)} \right) 4e^{-5x-z+2f+2y_0} dz dx + O(f) \\
&= \int_f^{f+y_0} \left( 2t_0 e^{-3x+2f} + \frac{2}{1+4\lambda - \frac{4\varepsilon}{\sqrt{t_0}}} e^{(-\lambda + \frac{\varepsilon}{\sqrt{t_0}})(4x+2L)-3x+2f} \right) dx \\
&\quad + \int_{f+y_0}^{+\infty} \left( 4t_0 e^{-6x+3f+3y_0} + \frac{4}{1+4\lambda - \frac{4\varepsilon}{\sqrt{t_0}}} e^{(-\lambda + \frac{\varepsilon}{\sqrt{t_0}})(8x-4f-4y_0+2L)-6x+3f+3y_0} \right) dx + O(f) \\
&= \frac{2}{3} t_0 (e^{-f} - e^{-f-3y_0}) + \frac{2}{(1+4\lambda - \frac{4\varepsilon}{\sqrt{t_0}})(3+4\lambda - \frac{4\varepsilon}{\sqrt{t_0}})} \left( e^{(-\lambda + \frac{\varepsilon}{\sqrt{t_0}})(4f+2L)-f} - e^{(-\lambda + \frac{\varepsilon}{\sqrt{t_0}})(4f+4y_0+2L)-f-3y_0} \right) \\
&\quad + \frac{4}{6} t_0 e^{-3f-3y_0} + \frac{4}{(1+4\lambda - \frac{4\varepsilon}{\sqrt{t_0}})(6+8\lambda - \frac{8\varepsilon}{\sqrt{t_0}})} e^{(-\lambda + \frac{\varepsilon}{\sqrt{t_0}})(4f+4y_0+2L)-3f-3y_0} + O(f) \\
&= \frac{2}{3} t_0 + \frac{2e^{-2L(\lambda - \frac{\varepsilon}{\sqrt{t_0}})}}{(1+4\lambda - \frac{4\varepsilon}{\sqrt{t_0}})(3+4\lambda - \frac{4\varepsilon}{\sqrt{t_0}})} + O(f).
\end{aligned}$$

Case 2: Balanced tree. Let  $P(x)$  be functions to random variables denoting SU difference in heights of points  $(p, p')$  where  $p'$  is  $x$  CU distance above  $p$ ; let  $Q(y)$  be functions to random variables denoting SU difference in heights of points  $(q, q')$  where  $q'$  is  $y$  CU distance above  $q$ . Note that  $P(x_0+z) - P(x_0) = Q(y_0+z) - Q(y_0)$  where  $P(x_0)$  and  $Q(y_0)$  denote the SU length of  $(p, r)$  and  $(q, r)$ , respectively. Let random variable  $\Lambda := (l_{S^+}(a, p) + l_{S^+}(b, p) + l_{S^+}(c, q) + l_{S^+}(d, q))$  be the total SU terminal branch lengths and the constant value  $L$  be the CU distance corresponding to  $\Lambda$ .

- $\delta_1$ : Here,

$$\mathbb{E}[\delta_1 w_G(ab|cd)] = \mathbb{E} \left[ \int_0^{x_0} \int_0^{+\infty} e^{-2P(x)-2Q(y)-\Lambda} e^{-x} e^{-y} dy dx \right];$$

and

$$\mathbb{E}[\delta_1 w_G^2(ab|cd)] \leq \mathbb{E}[\delta_1 w_G(ab|cd)] = O(f).$$

- $\delta_2$ : Here,

$$\mathbb{E}[\delta_2 w_G(ab|cd)] = \mathbb{E} \left[ \int_{x_0}^{+\infty} \int_0^{y_0} e^{-2P(x)-2Q(y)-\Lambda} e^{-x} e^{-y} dy dx \right];$$

and

$$\mathbb{E}[\delta_2 w_G^2(ab|cd)] \leq \mathbb{E}[\delta_2 w_G(ab|cd)] = O(f).$$

- $\delta_3$ : Similar to the unbalanced case, when  $G$  has the topology  $ab|cd$ , either  $p'$  or  $q'$  must be the lowest point of coalescence, and by symmetry, the two cases must have the same PDFs. Thus,

$$\begin{aligned}
\mathbb{E}[\delta_3 w_G^2(ab|cd)] &= \mathbb{E} \left[ \int_{x_0}^{+\infty} \int_{x-x_0+y_0}^{+\infty} e^{-4P(x)-4Q(y)-2\Lambda} 2e^{-x_0} e^{-y_0} e^{-6x+6x_0} e^{-y+x-x_0+y_0} dy dx \right] \\
&= \int_{x_0}^{+\infty} \int_{x-x_0+y_0}^{+\infty} \mathbb{E} \left[ e^{-4P(x)-4Q(y)-2\Lambda} \right] 2e^{-5x-y+4x_0} dy dx.
\end{aligned}$$

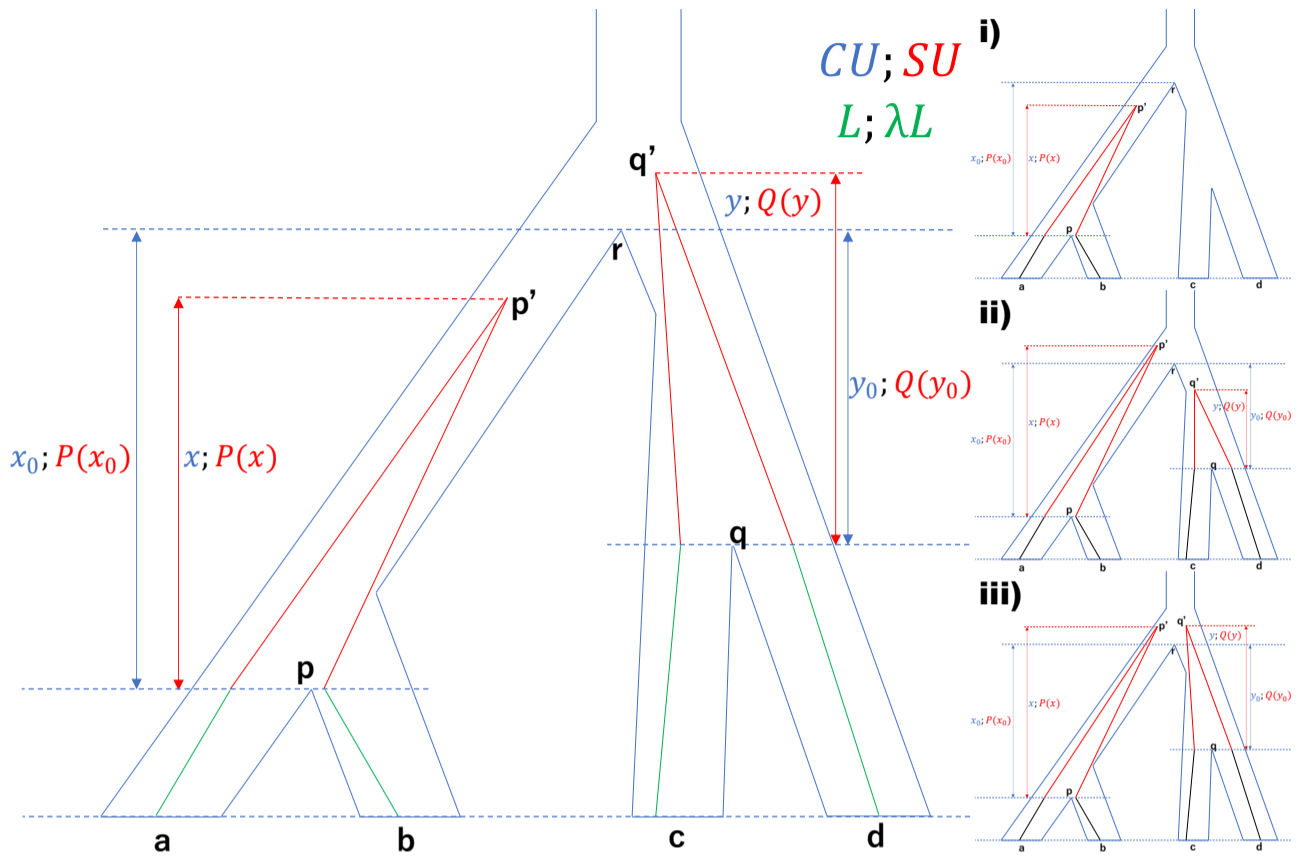

**FIG. S26.** Illustration of the unbalanced case. Lengths in CU/SU units are denoted in blue/red. Branches in green have a total length  $L/\lambda$  in CU/SU units. The right-hand side shows the position of  $p'$  and  $q'$  in relation to  $r$  in various cases.

Replacing in (13), we get

$$\begin{aligned}
\mathbb{E}[X_G] &= \mathbb{E}[(\delta_1 + \delta_2)w_G(ab|cd)] \\
&= \mathbb{E}\left[\int_0^{x_0} \int_0^{+\infty} e^{-2P(x)-2Q(y)-\Lambda} e^{-x} e^{-y} dy dx + \int_{x_0}^{+\infty} \int_0^{y_0} e^{-2P(x)-2Q(y)-\Lambda} e^{-x} e^{-y} dy dx\right] \\
&\geq \int_0^{x_0} \int_0^{+\infty} e^{-2\lambda x-2\lambda y-\lambda L} e^{-x} e^{-y} dy dx + \int_{x_0}^{+\infty} \int_0^{y_0} e^{-2\lambda x-2\lambda y-\lambda L} e^{-x} e^{-y} dy dx \\
&= \frac{(x_0 + y_0)e^{-\lambda L}}{1+2\lambda} + O(f^2) = \frac{fe^{-\lambda L}}{1+2\lambda} + O(f^2);
\end{aligned}$$



and replacing in (14), for any  $0 < t_0 < 1$ ,

$$\begin{aligned}
\text{Var}[X_G] &= \mathbb{E}[(\delta_1 + \delta_2 + 2\delta_3)w_G^2(ab|cd)] - \mathbb{E}^2[X_G] \\
&= \mathbb{E}[2\delta_3 w_G^2(ab|cd)] + O(f) \\
&= \int_{x_0}^{+\infty} \int_{x-x_0+y_0}^{+\infty} \mathbb{E}\left[e^{-4P(x)-4Q(y)-2\Lambda}\right] 4e^{-5x-y+4x_0} dy dx \\
&\leq \int_{x_0}^{+\infty} \int_{x-x_0+y_0}^{+\infty} \left(t_0 + e^{(-\lambda + \frac{\varepsilon}{\sqrt{t_0}})(4x+4y+2L)}\right) 4e^{-5x-y+4x_0} dy dx + O(f) \\
&= \int_{x_0}^{+\infty} \left(4e^{-6x-y_0+5x_0} t_0 + \frac{4}{1+4\lambda - \frac{4\varepsilon}{\sqrt{t_0}}} e^{-6x-y_0+5x_0 + (-\lambda + \frac{\varepsilon}{\sqrt{t_0}})(8x-4x_0+4y_0+2L)}\right) dx + O(f) \\
&= \frac{4}{6} e^{-x_0-y_0} t_0 + \frac{4}{(1+4\lambda - \frac{4\varepsilon}{\sqrt{t_0}})(6+8\lambda - \frac{8\varepsilon}{\sqrt{t_0}})} e^{-x_0-y_0 + (-\lambda + \frac{\varepsilon}{\sqrt{t_0}})(4x_0+4y_0+2L)} + O(f) \\
&= \frac{2}{3} t_0 + \frac{2e^{-2L(\lambda - \frac{\varepsilon}{\sqrt{t_0}})}}{(1+4\lambda - \frac{4\varepsilon}{\sqrt{t_0}})(3+4\lambda - \frac{4\varepsilon}{\sqrt{t_0}})} + O(f),
\end{aligned}$$

from which our assumption of  $\text{Var}[X_G] = \Theta_f(1)$  follows.

Thus, for both balanced and unbalanced trees, the variance is bounded the by same expression, and thus in both cases,

$$\begin{aligned}
\text{Var}[X_{G^*}] &\leq \frac{2}{3} t_0 + 2 \frac{e^{-2\lambda L}}{(1+4\lambda)(3+4\lambda)} \frac{1}{\left(1 - \frac{4\varepsilon}{(1+4\lambda)\sqrt{t_0}}\right) \left(1 - \frac{4\varepsilon}{(3+4\lambda)\sqrt{t_0}}\right) e^{-\frac{2\varepsilon L}{\sqrt{t_0}}}} + O(f) \\
&\leq \frac{2}{3} t_0 + 2 \frac{e^{-2\lambda L}}{\left(1 - \frac{4\varepsilon}{(1+4\lambda)\sqrt{t_0}}\right) \left(1 - \frac{4\varepsilon}{(3+4\lambda)\sqrt{t_0}}\right) \left(1 - \frac{2\varepsilon L}{\sqrt{t_0}}\right)} + O(f) \\
&\leq \frac{2}{3} t_0 + 2 \frac{e^{-2\lambda L}}{\left(1 - \frac{4\varepsilon}{(1+4\lambda)\sqrt{t_0}} - \frac{4\varepsilon}{(3+4\lambda)\sqrt{t_0}} - \frac{2\varepsilon L}{\sqrt{t_0}}\right)} + O(f) \\
&= \frac{2}{3} t_0 + \frac{2e^{-2\lambda L}}{(3+16\lambda+16\lambda^2) - \frac{\varepsilon}{\sqrt{t_0}}((16+32\lambda) + (6+32\lambda+32\lambda^2)L)} + O(f).
\end{aligned}$$

Now, let  $C := (16+32\lambda) + (6+32\lambda+32\lambda^2)L$ ,  $t_0 = \left(\frac{C^{\frac{1}{3}} \varepsilon^{\frac{1}{3}}}{(3+16\lambda+16\lambda^2)e^{\frac{2}{3}\lambda L}}\right)^2$ , we get

$$\begin{aligned}
\text{Var}[X_{G^*}] &\leq \frac{2e^{-2\lambda L}}{3(3+16\lambda+16\lambda^2)^2} \left( (\varepsilon e^{\lambda L} C)^{\frac{2}{3}} + \frac{9+48\lambda+48\lambda^2}{1 - (\varepsilon e^{\lambda L} C)^{\frac{2}{3}}} \right) + O(f) \\
&= \frac{2e^{-2\lambda L}}{3(3+16\lambda+16\lambda^2)} \left( \frac{(\varepsilon e^{\lambda L} C)^{\frac{2}{3}}}{3+16\lambda+16\lambda^2} + 3 + \frac{3(\varepsilon e^{\lambda L} C)^{\frac{2}{3}}}{1 - (\varepsilon e^{\lambda L} C)^{\frac{2}{3}}} \right) + O(f).
\end{aligned}$$

Now, recalling that  $\varepsilon = \frac{e^{-\lambda L}}{C} \left(\frac{20(\lambda+\lambda^2)}{9(1+2\lambda)^2}\right)^{\frac{3}{2}}$ ,

$$\begin{aligned}
\text{Var}[X_{G^*}] &\leq \frac{2}{3(3+16\lambda+16\lambda^2)(1+2\lambda)^2} \\
&\quad \left( \frac{\frac{20}{9}(\lambda+\lambda^2)}{3+16\lambda+16\lambda^2} + 3 + \frac{3(\frac{20}{9})(\lambda+\lambda^2)}{1-\frac{\frac{20}{9}(\lambda+\lambda^2)}{1+4\lambda+4\lambda^2}} \right) + O(f) \\
&\leq \frac{2}{3(3+16\lambda+16\lambda^2)(1+2\lambda)^2} \left( \frac{20}{27}\lambda + 3 + \frac{\frac{20}{3}(\lambda+\lambda^2)}{1-\frac{5}{9}} \right) + O(f) \\
&= \frac{2}{3(3+16\lambda+16\lambda^2)(1+2\lambda)^2} \left( \frac{20}{27}\lambda + 3 + 15(\lambda+\lambda^2) \right) + O(f) \\
&< \frac{2}{3(1+2\lambda)^2} \left( \frac{3+16\lambda+15\lambda^2}{3+16\lambda+16\lambda^2} \right) + O(f).
\end{aligned}$$

□

---

**THEOREM 2.** *Under the conditions of Proposition 2 or Proposition 3,*

$$P\left(\sum_{G \in \mathcal{G}} w_G(ab|cd) \leq \sum_{G \in \mathcal{G}} w_G(ac|bd)\right) \leq P\left(\sum_{G \in \mathcal{G}} \delta_G(ab|cd) \leq \sum_{G \in \mathcal{G}} \delta_G(ac|bd)\right).$$

*Proof.* We start with proving this theorem under the conditions of Proposition 2. Recall  $X_G := w_G(ab|cd) - w_G(ac|bd)$  and  $Y_G := \delta_G(ab|cd) - \delta_G(ac|bd)$ , and let  $\bar{X}_{\mathcal{G}} = \frac{1}{k} \sum_{G \in \mathcal{G}} X_G$  and  $\bar{Y}_{\mathcal{G}} = \frac{1}{k} \sum_{G \in \mathcal{G}} Y_G$ . Recall also that under Proposition 2, proved below, under conditions of Theorem 2, we have  $\text{Var}[\bar{X}_{\mathcal{G}}] = \Omega(1)$  and

$$\frac{\mathbb{E}[X_G]}{\sqrt{\text{Var}[X_G]}} = -\sqrt{\frac{3+16\lambda+16\lambda^2}{3+16\lambda+15\lambda^2}} \sqrt{\frac{3}{2}} f + O(f^2). \quad (15)$$

Similarly, we can compute the ratio of mean and variance for  $Y$  (corresponding to unweighted ASTRAL):

$$\mathbb{E}[Y_G] := \mathbb{E}[\delta_G(ab|cd) - \delta_G(ac|bd)] = 1 - e^{-f} = f + O(f^2)$$

$$\text{Var}[Y_G] := \text{Var}[\delta_G(ab|cd) - \delta_G(ac|bd)] = \frac{5}{3} e^{-f} - e^{-2f} = \frac{2}{3} + O(f)$$

and thus,

$$\frac{\mathbb{E}[Y_G]}{\sqrt{\text{Var}[Y_G]}} = \sqrt{\frac{3}{2}} f + O(f^2). \quad (16)$$

Given Proposition 2, we can use Berry–Esseen theorem to derive

$$\begin{aligned}
P(\bar{X}_{\mathcal{G}} \leq 0) &= P\left(\frac{\sqrt{k}}{\sqrt{\text{Var}[X_G]}} (\bar{X}_{\mathcal{G}} - \mathbb{E}[X_G]) \leq -\frac{\sqrt{k}}{\sqrt{\text{Var}[X_G]}} \mathbb{E}[X_G]\right) = \\
&\quad \Phi\left(-\sqrt{k} \frac{\mathbb{E}[X_G]}{\sqrt{\text{Var}[X_G]}}\right) + O\left(\frac{1}{\sqrt{k}}\right),
\end{aligned}$$

where  $\Phi$  denotes CDF of the standard Normal distribution. Since  $k = \Theta(f^{-2})$ ,

$$P(\bar{X}_{\mathcal{G}} \leq 0) = \Phi\left(-\sqrt{k} \frac{\mathbb{E}[X_G]}{\sqrt{\text{Var}[X_G]}}\right) + O(f) \quad (17)$$

and

$$P(\bar{Y}_{\mathcal{G}} \leq 0) = \Phi\left(-\sqrt{k} \frac{\mathbb{E}[Y_G]}{\sqrt{\text{Var}[Y_G]}}\right) + O(f), \quad (18)$$

Combining equations (17) and (18) with (15) and (16), we get

$$P\left(\sum_{G \in \mathcal{G}} w_G(ab|cd) \leq \sum_{G \in \mathcal{G}} w_G(ac|bd)\right) = \Phi\left(-\sqrt{\frac{3+16\lambda+16\lambda^2}{3+16\lambda+15\lambda^2}} \sqrt{\frac{3}{2}} f\sqrt{k}\right) + O(f)$$

and

$$P\left(\sum_{G \in \mathcal{G}} \delta_G(ab|cd) \leq \sum_{G \in \mathcal{G}} \delta_G(ac|bd)\right) = \Phi\left(-\sqrt{\frac{3}{2}} f\sqrt{k}\right) + O(f).$$

As  $f \rightarrow 0$ , the interval  $(-\sqrt{1 + \frac{4\lambda+4\lambda^2}{3(1+2\lambda)^2}} \sqrt{\frac{3}{2}} f\sqrt{k}, -\sqrt{\frac{3}{2}} f\sqrt{k})$  does not shrink because  $\Theta(f\sqrt{k}) = \Theta(1)$ . Thus, we have

$$\Phi\left(-\sqrt{\frac{3}{2}} f\sqrt{k}\right) - \Phi\left(-\sqrt{1 + \frac{4\lambda+4\lambda^2}{3(1+2\lambda)^2}} \sqrt{\frac{3}{2}} f\sqrt{k}\right) = \Theta(1)$$

ensuring that

$$P\left(\sum_{G \in \mathcal{G}} w_G(ab|cd) \leq \sum_{G \in \mathcal{G}} w_G(ac|bd)\right) \leq P\left(\sum_{G \in \mathcal{G}} \delta_G(ab|cd) \leq \sum_{G \in \mathcal{G}} \delta_G(ac|bd)\right).$$

The proof under Proposition 3 is similar. Recall that under Proposition 3,  $\text{Var}[X_{G^*}] = \Theta_f(1)$  and

$$\frac{\mathbb{E}[X_{G^*}]}{\sqrt{\text{Var}[X_{G^*}]}} \geq \sqrt{\frac{3}{2}} \left(1 - \frac{4\lambda^2}{(1+4\lambda)^2}\right)^{-\frac{1}{2}} f + O(f^2). \quad (19)$$

Given this result, the rest of the proof is similar to the proof under the conditions of Proposition 2, culminating in

$$P\left(\sum_{G^* \in \mathcal{G}} w_{G^*}(ab|cd) \leq \sum_{G^* \in \mathcal{G}} w_{G^*}(ac|bd)\right) \leq \Phi\left(-\left(1 - \frac{4\lambda^2}{(1+4\lambda)^2}\right)^{-\frac{1}{2}} \sqrt{\frac{3}{2}} f\sqrt{k}\right) + O(f).$$

□

## Placement-based Algorithm

In this section, for a node  $v$  in tree  $G$ , we let  $\mathcal{L}_v$  denote the set of leaves under  $v$ .

### *Proof of Theorem 3*

**THEOREM 3.** *Let  $S$  be a species tree,  $i$  be a species not in  $\mathcal{L}_S$ ,  $\mathcal{S}$  be the set of possible species tree topologies by placing  $i$  onto  $S$ , and  $S'$  be the output of Algorithm S1. Then,  $W(S', \mathcal{G}) = \max_{\hat{S} \in \mathcal{S}} W(\hat{S}, \mathcal{G})$ .*

*Proof.* We start with two propositions, proved below.

**PROPOSITION 5.** *After each call to  $\text{ColorLeafSet}(\mathcal{L}^*, X, T, \mathcal{G}, W)$  with a  $T \neq \emptyset$ ,  $W[T] = \sum_{G \in \mathcal{G}} W(T, G)$ .*

**PROPOSITION 6.** *Before calling  $\text{OptimalTreeDP}$  in line 6 of Algorithm S1, lookup table  $W$  contains all tripartitions corresponding to internal nodes of all tree topologies in  $\mathcal{S}$ .*

By Proposition 6, all tripartitions corresponding to internal nodes of all tree topologies in  $\mathcal{S}$  pre-computed. Then,  $\text{OptimalTreeDP}$  uses a dynamic programming algorithm similar to the one formulated by Mirarab and Warnow 2015 to compute  $\arg\max_{\hat{S} \in \mathcal{S}} W(\hat{S}, \mathcal{G})$ .  $\square$

**PROPOSITION 5.** *After each call to  $\text{ColorLeafSet}(\mathcal{L}^*, X, T, \mathcal{G}, W)$  with a  $T \neq \emptyset$ ,  $W[T] = \sum_{G \in \mathcal{G}} W(T, G)$ .*

*Proof.* For a gene tree node  $w$  and a color  $X$ , let  $\mathcal{L}_w^X$  denote the set of leaves in  $\mathcal{L}_w$  colored by  $X$ . For an internal node  $w$ , let  $u, v$  be the children of  $w$ ,  $p$  be the parent of  $w$  (if  $w$  is not the root), and  $e$  denote the branch  $(w, p)$ . For a leaf  $i$  and internal node  $w$ , let  $\mathcal{P}_{i,w}$  denote path between  $i$  and  $w$  and  $s(\mathcal{P}) = 1 - \prod_{\hat{e} \in \mathcal{P}} (1 - s(\hat{e}))$ . For leaves  $i, j$ , let  $m(i, j)$  denote MRCA of  $i$  and  $j$ . Referring back to Table S1, we first establish the connection between recursive formulas of the algorithm and counter definitions.

- When  $u_X = \sum_{i \in \mathcal{L}_u^X} e^{-l(\mathcal{P}_{i,w})}$ ,  $v_X = \sum_{i \in \mathcal{L}_v^X} e^{-l(\mathcal{P}_{i,w})}$ ,

$$w_X := \left( (u_X + v_X) e^{-l(e)} \right) = \sum_{i \in \mathcal{L}_w^X} e^{-l(\mathcal{P}_{i,w})} e^{-l(e)} = \sum_{i \in \mathcal{L}_w^X} e^{-l(\mathcal{P}_{i,p})}.$$

- When  $u_{XX}^+ = \sum_{\{i,j\} \subseteq \mathcal{L}_u^X} e^{-l(\mathcal{P}_{i,j})}$ ,  $v_{XX}^+ = \sum_{\{i,j\} \subseteq \mathcal{L}_v^X} e^{-l(\mathcal{P}_{i,j})}$ ,

$$\begin{aligned} w_{XX}^+ &:= u_{XX}^+ + v_{XX}^+ + u_X v_X = \sum_{\{i,j\} \subseteq \mathcal{L}_u^X} e^{-l(\mathcal{P}_{i,j})} + \sum_{\{i,j\} \subseteq \mathcal{L}_v^X} e^{-l(\mathcal{P}_{i,j})} + \sum_{i \in \mathcal{L}_u^X} e^{-l(\mathcal{P}_{i,w})} \sum_{j \in \mathcal{L}_v^X} e^{-l(\mathcal{P}_{j,w})} \\ &= \sum_{\{i,j\} \subseteq \mathcal{L}_u^X} e^{-l(\mathcal{P}_{i,j})} + \sum_{\{i,j\} \subseteq \mathcal{L}_v^X} e^{-l(\mathcal{P}_{i,j})} + \sum_{i \in \mathcal{L}_u^X} \sum_{j \in \mathcal{L}_v^X} e^{-l(\mathcal{P}_{i,j})} = \sum_{\{i,j\} \subseteq \mathcal{L}_w^X} e^{-l(\mathcal{P}_{i,j})}. \end{aligned}$$

- For  $X \neq Y$ , when  $u_{XY}^+ = \sum_{(i,j) \in \mathcal{L}_u^X \times \mathcal{L}_u^Y} e^{-l(\mathcal{P}_{i,j})}$ ,  $v_{XY}^+ = \sum_{(i,j) \in \mathcal{L}_v^X \times \mathcal{L}_v^Y} e^{-l(\mathcal{P}_{i,j})}$ ,

$$\begin{aligned} w_{XY}^+ &:= u_{XY}^+ + v_{XY}^+ + u_X v_Y + u_Y v_X \\ &= \sum_{(i,j) \in \mathcal{L}_u^X \times \mathcal{L}_u^Y} e^{-l(\mathcal{P}_{i,j})} + \sum_{(i,j) \in \mathcal{L}_v^X \times \mathcal{L}_v^Y} e^{-l(\mathcal{P}_{i,j})} + \sum_{(i,j) \in \mathcal{L}_u^X \times \mathcal{L}_v^Y} e^{-l(\mathcal{P}_{i,j})} + \sum_{(i,j) \in \mathcal{L}_v^X \times \mathcal{L}_u^Y} e^{-l(\mathcal{P}_{i,j})} \\ &= \sum_{\{i,j\} \subseteq \mathcal{L}_w^X \times \mathcal{L}_w^Y} e^{-l(\mathcal{P}_{i,j})}. \end{aligned}$$

- When  $u_{\bar{X}X} = \sum_{\{i,j\} \subseteq \mathcal{L}_u^X} e^{-l(\mathcal{P}_{i,j})} \prod_{\hat{e} \in \mathcal{P}_{m(i,j),w}} (1-s(\hat{e}))$ ,  $v_{\bar{X}X} = \sum_{\{i,j\} \subseteq \mathcal{L}_v^X} e^{-l(\mathcal{P}_{i,j})} \prod_{\hat{e} \in \mathcal{P}_{m(i,j),w}} (1-s(\hat{e}))$ ,

$$\begin{aligned} w_{\bar{X}X} &:= (u_{\bar{X}X} + v_{\bar{X}X} + u_X v_X) (1-s(e)) \\ &= \sum_{\{i,j\} \subseteq \mathcal{L}_u^X} e^{-l(\mathcal{P}_{i,j})} \prod_{\hat{e} \in \mathcal{P}_{m(i,j),p}} (1-s(\hat{e})) + \sum_{\{i,j\} \subseteq \mathcal{L}_v^X} e^{-l(\mathcal{P}_{i,j})} \prod_{\hat{e} \in \mathcal{P}_{m(i,j),p}} (1-s(\hat{e})) \\ &\quad + \sum_{(i,j) \in \mathcal{L}_u^X \times \mathcal{L}_v^X} e^{-l(\mathcal{P}_{i,j})} (1-s(e)) = \sum_{\{i,j\} \subseteq \mathcal{L}_w^X} e^{-l(\mathcal{P}_{i,j})} \prod_{\hat{e} \in \mathcal{P}_{m(i,j),p}} (1-s(\hat{e})). \end{aligned}$$

- When  $u_{\bar{X}Y} = \sum_{(i,j) \in \mathcal{L}_u^X \times \mathcal{L}_u^Y} e^{-l(\mathcal{P}_{i,j})} (1-s(\mathcal{P}_{m(i,j),w}))$ ,  $v_{\bar{X}Y} = \sum_{(i,j) \in \mathcal{L}_u^X \times \mathcal{L}_v^Y} e^{-l(\mathcal{P}_{i,j})} (1-s(\mathcal{P}_{m(i,j),w}))$ , and  $X \neq Y$ , similarly,

$$w_{\bar{X}Y} := (u_{\bar{X}Y} + v_{\bar{X}Y} + u_X v_Y + u_Y v_X) (1-s(e)) = \sum_{(i,j) \in \mathcal{L}_w^X \times \mathcal{L}_w^Y} e^{-l(\mathcal{P}_{i,j})} (1-s(\mathcal{P}_{m(i,j),p})).$$

- For  $X \neq Y$ , when  $u_{XX|Y} = \sum_{\{i,j\} \subseteq \mathcal{L}_u^X} \sum_{k \in \{k' \in \mathcal{L}_v^Y : \mathcal{L}_{m(i,j)} \subsetneq \mathcal{L}_{m(i,k')}\}} e^{-l(\mathcal{P}_{i,j})-l(\mathcal{P}_{k,w})} s(\mathcal{P}_{m(i,j),m(i,k)})$ ,  $v_{XX|Y} = \sum_{\{i,j\} \subseteq \mathcal{L}_v^X} \sum_{k \in \{k' \in \mathcal{L}_v^Y : \mathcal{L}_{m(i,j)} \subsetneq \mathcal{L}_{m(i,k')}\}} e^{-l(\mathcal{P}_{i,j})-l(\mathcal{P}_{k,w})} s(\mathcal{P}_{m(i,j),m(i,k)})$ ,

$$w_{XX|Y} := (u_{XX|Y} + v_{XX|Y} + (u_{XX}^+ - u_{XX}^-)v_Y + u_Y(v_{XX}^+ - v_{XX}^-)) e^{-l(e)}.$$

Notice that  $(u_{XX}^+ - u_{XX}^-)v_Y = \sum_{\{i,j\} \subseteq \mathcal{L}_u^X} \sum_{k \in \mathcal{L}_v^Y} e^{-l(\mathcal{P}_{i,j})-l(\mathcal{P}_{k,w})} s(\mathcal{P}_{m(i,j),w})$  and  $u_Y(v_{XX}^+ - v_{XX}^-) = \sum_{\{i,j\} \subseteq \mathcal{L}_v^X} \sum_{k \in \mathcal{L}_u^Y} e^{-l(\mathcal{P}_{i,j})-l(\mathcal{P}_{k,w})} s(\mathcal{P}_{m(i,j),w})$ . Thus,

$$\begin{aligned} w_{XX|Y} &= \sum_{\{i,j\} \subseteq \mathcal{L}_w^X} \sum_{k \in \{k' \in \mathcal{L}_w^Y : \mathcal{L}_{m(i,j)} \subsetneq \mathcal{L}_{m(i,k')}\}} e^{-l(\mathcal{P}_{i,j})-l(\mathcal{P}_{k,w})} s(\mathcal{P}_{m(i,j),m(i,k)}) e^{-l(e)} \\ &= \sum_{\{i,j\} \subseteq \mathcal{L}_w^X} \sum_{k \in \{k' \in \mathcal{L}_w^Y : \mathcal{L}_{m(i,j)} \subsetneq \mathcal{L}_{m(i,k')}\}} e^{-l(\mathcal{P}_{i,j})-l(\mathcal{P}_{k,p})} s(\mathcal{P}_{m(i,j),m(i,k)}). \end{aligned}$$

- Similarly, when  $u_{XY|Z} = \sum_{(i,j) \in \mathcal{L}_u^X \times \mathcal{L}_u^Y} \sum_{k \in \{k' \in \mathcal{L}_u^Z : \mathcal{L}_{m(i,j)} \subsetneq \mathcal{L}_{m(i,k')}\}} e^{-l(\mathcal{P}_{i,j})-l(\mathcal{P}_{k,w})} s(\mathcal{P}_{m(i,j),m(i,k)})$ ,  $v_{XY|Z} = \sum_{(i,j) \in \mathcal{L}_v^X \times \mathcal{L}_v^Y} \sum_{k \in \{k' \in \mathcal{L}_v^Z : \mathcal{L}_{m(i,j)} \subsetneq \mathcal{L}_{m(i,k')}\}} e^{-l(\mathcal{P}_{i,j})-l(\mathcal{P}_{k,w})} s(\mathcal{P}_{m(i,j),m(i,k)})$ , for distinct  $X, Y, Z$ ,

$$w_{XY|Z} = \sum_{(i,j) \in \mathcal{L}_w^X \times \mathcal{L}_w^Y} \sum_{k \in \{k' \in \mathcal{L}_w^Z : \mathcal{L}_{m(i,j)} \subsetneq \mathcal{L}_{m(i,k')}\}} e^{-l(\mathcal{P}_{i,j})-l(\mathcal{P}_{k,p})} s(\mathcal{P}_{m(i,j),m(i,k)}).$$

- For distinct  $X, Y, Z$ ,

$$\begin{aligned} w_{XX|YZ} &:= v_X u_{YZ|X} + u_X v_{YZ|X} + u_{XX|Z} v_Y + v_{XX|Z} u_Y + u_{XX|Y} v_Z + v_{XX|Y} u_Z \\ &\quad + (u_{YZ}^+ v_{XX}^+ - u_{YZ}^- v_{XX}^-) + (u_{XX}^+ v_{YZ}^+ - u_{XX}^- v_{YZ}^-). \end{aligned}$$

Notice that,

$$\begin{aligned} v_X u_{YZ|X} &= \sum_{(h,i,j,k) \in \mathcal{L}_v^X \times \mathcal{L}_u^Y \times \mathcal{L}_u^Z \times \mathcal{L}_u^X} \delta_G(hk|ij) e^{-l(\mathcal{P}_{h,w})} e^{-l(\mathcal{P}_{i,j})-l(\mathcal{P}_{k,w})} s(\mathcal{P}_{m(i,j),m(i,k)}) \\ &= \sum_{(h,i,j,k) \in \mathcal{L}_v^X \times \mathcal{L}_u^Y \times \mathcal{L}_u^Z \times \mathcal{L}_u^X} \delta_G(hk|ij) e^{-l(\mathcal{P}_{i,j})-l(\mathcal{P}_{k,h})} s(\mathcal{P}_{m(i,j),m(i,k)}) \\ &= \sum_{(h,i,j,k) \in \mathcal{L}_v^X \times \mathcal{L}_u^Y \times \mathcal{L}_u^Z \times \mathcal{L}_u^X} w_G(hk|ij). \end{aligned}$$

Similarly,

$$\begin{aligned}
u_X v_{YZ|X} &= \sum_{\substack{h \in \mathcal{L}_u^X \\ i \in \mathcal{L}_v^Y \\ j \in \mathcal{L}_v^Z \\ k \in \mathcal{L}_v^X}} w_G(hk|ij), u_{XX|Z} v_Y = \sum_{\substack{\{h,i\} \subseteq \mathcal{L}_u^X \\ j \in \mathcal{L}_u^Z \\ k \in \mathcal{L}_v^Y}} w_G(hi|jk), v_{XX|Z} u_Y = \sum_{\substack{\{h,i\} \subseteq \mathcal{L}_v^X \\ j \in \mathcal{L}_v^Z \\ k \in \mathcal{L}_u^Y}} w_G(hi|jk), \\
u_{XX|Y} v_Z &= \sum_{\substack{\{h,i\} \subseteq \mathcal{L}_u^X \\ j \in \mathcal{L}_u^Y \\ k \in \mathcal{L}_v^Z}} w_G(hi|jk), v_{XX|Y} u_Z = \sum_{\substack{\{h,i\} \subseteq \mathcal{L}_v^X \\ j \in \mathcal{L}_v^Y \\ k \in \mathcal{L}_u^Z}} w_G(hi|jk).
\end{aligned}$$

Also,

$$\begin{aligned}
u_{YZ}^+ v_{XX}^+ - u_{YZ}^- v_{XX}^- &= \sum_{(h,i) \in \mathcal{L}_u^Y \times \mathcal{L}_u^Z} \sum_{\{j,k\} \subseteq \mathcal{L}_v^X} e^{-l(\mathcal{P}_{h,i}) - l(\mathcal{P}_{j,k})} \\
&\quad - \sum_{(h,i) \in \mathcal{L}_u^Y \times \mathcal{L}_u^Z} \sum_{\{j,k\} \subseteq \mathcal{L}_v^X} e^{-l(\mathcal{P}_{h,i}) - l(\mathcal{P}_{j,k})} \prod_{\hat{e} \in \mathcal{P}_{m(h,i),w}} (1 - s(\hat{e})) \prod_{\hat{e} \in \mathcal{P}_{m(j,k),w}} (1 - s(\hat{e})) \\
&= \sum_{(h,i) \in \mathcal{L}_u^Y \times \mathcal{L}_u^Z} \sum_{\{j,k\} \subseteq \mathcal{L}_v^X} e^{-l(\mathcal{P}_{h,i}) - l(\mathcal{P}_{j,k})} \left( 1 - \prod_{\hat{e} \in \mathcal{P}_{m(h,i),m(j,k)}} (1 - s(\hat{e})) \right) \\
&= \sum_{(h,i) \in \mathcal{L}_u^Y \times \mathcal{L}_u^Z} \sum_{\{j,k\} \subseteq \mathcal{L}_v^X} w_G(hi|jk).
\end{aligned}$$

Similarly,

$$u_{XX}^+ v_{YZ}^+ - u_{XX}^- v_{YZ}^- = \sum_{\{h,i\} \subseteq \mathcal{L}_u^X} \sum_{(j,k) \in \mathcal{L}_v^Y \times \mathcal{L}_v^Z} w_G(hi|jk).$$

Notice that above cases count exactly once all quartets  $hi|jk$  for all leaf nodes  $h, i$  colored X,  $j$  colored Y,  $k$  colored Z such that MRCA of  $h, i, j, k$  is  $w$ ; namely,

$$w_{XX|YZ} = \sum_{\{h,i\} \subseteq \mathcal{L}_w^X} \sum_{j \in \mathcal{L}_w^Y} \sum_{k \in \{k' : k' \in \mathcal{L}_w^Z, \text{MRCA}(h, i, j, k') = w\}} w_G(hi|jk).$$

- We define  $I(G)$  to be the set of internal nodes of gene tree  $G$  and  $\mathcal{L}_G^X$  be the set of leaves of gene tree  $G$  with color  $X$ . It is trivial to verify that at the

$$Q = \sum_{G \in \mathcal{G}} \sum_{w \in I(G)} w_{AA|BC} + \sum_{G \in \mathcal{G}} \sum_{w \in I(G)} w_{BB|CA} + \sum_{G \in \mathcal{G}} \sum_{w \in I(G)} w_{CC|AB}.$$

At the end of procedure **UpdateCounters**,  $\sum_{w \in I(G)} w_{XX|YZ} = \sum_{\{h,i\} \subseteq \mathcal{L}_G^X} \sum_{(j,k) \in \mathcal{L}_G^Y \times \mathcal{L}_G^Z} w_G(hi|jk)$ .

Thus,  $Q$  returned by **UpdateCounters** satisfies:

$$Q = \sum_{G \in \mathcal{G}} \left( \sum_{\substack{\{h,i\} \subseteq \mathcal{L}_G^A \\ (j,k) \in \mathcal{L}_G^B \times \mathcal{L}_G^C}} w_G(hi|jk) + \sum_{\substack{\{h,i\} \subseteq \mathcal{L}_G^B \\ (j,k) \in \mathcal{L}_G^C \times \mathcal{L}_G^A}} w_G(hi|jk) + \sum_{\substack{\{h,i\} \subseteq \mathcal{L}_G^C \\ (j,k) \in \mathcal{L}_G^A \times \mathcal{L}_G^B}} w_G(hi|jk) \right).$$

For tripartition  $T = A|B|C$ , note that by assumption, before the call, all the gene tree leaves are colored such that recoloring  $\mathcal{L}^*$  by  $X$  would produce a coloring that matches  $T$ . Thus, at the end of the call to **ColorLeafSet**, for each gene tree  $G$ , we have  $A \cap \mathcal{L}_G = \mathcal{L}_G^A$ ,  $B \cap \mathcal{L}_G = \mathcal{L}_G^B$ , and  $C \cap \mathcal{L}_G = \mathcal{L}_G^C$ .

Then, the value returned by **UpdateCounters** satisfies:

$$Q = \sum_{G \in \mathcal{G}} W(A|B|C, G). \quad (20)$$

It can be easily verified that after each call to `ColorLeafSet`( $\mathcal{L}^*, X, T, \mathcal{G}, W$ ), the species tree tripartition  $T$  matches the coloring of all gene trees as required by conditions of (20), concluding  $W[T] = Q = \sum_{G \in \mathcal{G}} W(T, G)$ .  $\square$

---

PROPOSITION 6. Before calling `OptimalTreeDP` in line 6 of Algorithm S1, lookup table  $W$  contains all tripartitions corresponding to internal nodes of all tree topologies in  $\mathcal{S}$ .

*Proof.* Each  $\hat{S} \in \mathcal{S}$  places  $i$  above a different node  $w$  of  $S$  creating a new node corresponding to tripartition  $\mathcal{L}_w|\{i\}|\mathcal{L}_S - \mathcal{L}_w$  covered in line 24. Besides new nodes, each existing internal node  $w$  of  $S$  will correspond to a different tripartition after placing  $i$  onto  $S$  depending on the relative location of  $w$  and  $i$ . Let  $u, v$  denote the larger and the smaller child of  $w$ . Node  $w$  corresponds to  $\mathcal{L}_u|\{i\} \cup \mathcal{L}_v|\mathcal{L}_S - \mathcal{L}_w$  if  $i$  is under  $u$ , corresponds to  $\{i\} \cup \mathcal{L}_u|\mathcal{L}_v|\mathcal{L}_S - \mathcal{L}_w$  if  $i$  is under  $v$ , and corresponds to  $\mathcal{L}_u|\mathcal{L}_v|\{i\} \cup \mathcal{L}_S - \mathcal{L}_w$  if  $i$  is above  $w$ . All three cases for each node  $w$  is covered in lines 20–22.  $\square$

---

*Proof of Theorem 4*

THEOREM 4. If there exists a species tree topology  $S^*$  satisfying that for each quartet subtree  $ab|cd$ ,

$$\sum_{G \in \mathcal{G}} w(ab|cd) > \max \left( \sum_{G \in \mathcal{G}} w(ac|bd), \sum_{G \in \mathcal{G}} w(ad|bc) \right), \quad (6)$$

then the output of Algorithm S2 will be  $S^*$ .

*Proof.* We start with a Corollary 1 of Theorem 3

COROLLARY 1. Assuming (6), if  $S$  is compatible with the true tree  $S^*$ , then  $S'$  is compatible with  $S^*$ .

By induction,  $W_i$  in line 8 of Algorithm S2 should contain all tripartitions of  $S^*$ , as at that time  $S_i = S^*$  by Corollary 1. Consequentially, the output of Algorithm S2 must also be  $S^*$ .  $\square$

---

*Proof of Proposition 4*

PROPOSITION 4. The time complexity of Algorithm S2 is  $O(kHn^2 \log n)$ .

*Proof.* We begin with a proposition and a corollary.

PROPOSITION 7. Procedure `ColorNode` on any species tree node  $w$  takes  $O(kH|\mathcal{L}_w| \log |\mathcal{L}_w|)$  time.

PROOF (SKETCH) OF PROPOSITION 7. We can prove this proposition by induction. For an internal node  $w$  with larger child  $u$  and smaller child  $v$ , if for some constant  $C \geq \frac{6}{\log 2}$ , `ColorNode` on  $u$  calls `UpdateCounters` at most  $Ck|\mathcal{L}_u|(\log |\mathcal{L}_u| + 1)$  times and `ColorNode` on  $u$  calls `UpdateCounters` at most  $Ck|\mathcal{L}_v|(\log |\mathcal{L}_v| + 1)$  times, then `ColorNode` on  $w$  calls `UpdateCounters` at most

$$\begin{aligned} & Ck|\mathcal{L}_u|(\log |\mathcal{L}_u| + 1) + Ck|\mathcal{L}_v|(\log |\mathcal{L}_v| + 1) + 3k(|\mathcal{L}_v| + 1) \\ & \leq Ck|\mathcal{L}_u|(\log |\mathcal{L}_w| + 1) + Ck|\mathcal{L}_v|(\log \frac{|\mathcal{L}_w|}{2} + 1) + 6k|\mathcal{L}_v| \\ & \leq Ck|\mathcal{L}_u|(\log |\mathcal{L}_w| + 1) + Ck|\mathcal{L}_v|(\log |\mathcal{L}_w| + 1) - Ck|\mathcal{L}_v|\log 2 + 6k|\mathcal{L}_v| \\ & \leq Ck|\mathcal{L}_w|(\log |\mathcal{L}_w| + 1) + (6 - C\log 2)k|\mathcal{L}_v| \\ & \leq Ck|\mathcal{L}_w|(\log |\mathcal{L}_w| + 1) \text{ times.} \end{aligned}$$

It is easy to verify that each `UpdateCounters` takes  $O(H_G)$  time where  $H_G$  is the height of the gene tree, and thus `ColorNode` on node  $w$  takes  $O(kH|\mathcal{L}_w|\log|\mathcal{L}_w|)$  time.  $\square$

COROLLARY 2 (Corollary of Proposition 7). *For any tree topology  $S$  with  $n$  species, the `Place` procedure on  $S$  takes  $O(kHn\log n)$  time.*

`NaivePlacement` of taxon set  $T$  makes  $r(|T|-3)$  calls to `Place`, each of which takes  $O(kH|T|\log|T|)$  time. Thus, `NaivePlacement` takes  $O(rkH|T|^2\log|T|)$  time and when  $T=\mathcal{L}_S$  and  $r=O(1)$ ,  $O(rkH|T|^2\log|T|)=O(n^2kH\log n)$ .  $\square$

*Proofs of Theorems 6 and Theorem 5*

THEOREM 6. *Under the conditions of Theorem 4, the DAC Algorithm S3 will output  $S^*$ .*

*Proof.* By Theorem 4,  $S_i$  in line 5 of Algorithm S3 are compatible with  $S^*$ . With Corollary 1, by induction, each  $S_e$  in line 21 of Algorithm S3 is compatible with  $S^*$ . Consequentially,  $W_i$  in line 26 contain all tripartitions of  $S^*$ , as at that time  $S'_i=S^*$ , and the output of Algorithm S3 must also be  $S^*$ .  $\square$

THEOREM 5. *When the inequality condition in Theorem 4 is satisfied, then the time complexity of the DAC algorithm is  $O(n^{1.5+\epsilon}kH)$  with arbitrarily high probability.*

PROOF (SKETCH). From the inequality (6), we can trivially deduct that  $S^*$  is the species tree topology that maximizes the weighted quartet score, and each  $S_i$  in line 5 of Algorithm S3 is compatible to  $S^*$ . Also, each  $C_e$  in line 15 of Algorithm S3 equals the set of species under the edges coming off of the internal nodes on the path of  $S^*$  corresponding to  $e$ .

We now introduce a proposition

PROPOSITION 8. *With high probability,  $\max_{e \in E_{S_i}} |C_e| \leq 2\sqrt{n}\log n + O(\sqrt{n})$ .*

*Proof.* For each pair of nodes  $u, v$  of  $S^*$ , let  $C_{u,v} := \{x : x \in \mathcal{L}_S, u \text{ is not on } \mathcal{P}_{x,v} \text{ and } v \text{ is not on } \mathcal{P}_{x,u}\}$ . It is easy to verify that for every  $e$  of  $S_i$ ,  $C_e = C_{u,v}$  for some nodes  $u, v$  of  $S^*$ . For every  $u$  and  $v$  that are sufficiently apart so that  $C_{u,v}$  has  $2\sqrt{n}\log n + \omega(\sqrt{n})$  elements and a random  $T_i$  in line 4 of Algorithm S3,

$$P(C_{u,v} \cap T_i = \emptyset) = \left(1 - \frac{1}{\sqrt{n}}\right)^{|C_{u,v}|} \leq e^{-\frac{1}{\sqrt{n}}|C_{u,v}|} = \frac{1}{n^2} e^{-\omega(1)} = o\left(\frac{1}{n^2}\right).$$

By union bound, the probability that there exists a pair of nodes  $u, v$  of  $S^*$  such that  $|C_{u,v}| \geq 2\sqrt{n}\log n + \omega(\sqrt{n})$  and  $C_{u,v} \cap T_i = \emptyset$  is  $o(1)$ . Since, by definition,  $C_e \cap T_i = \emptyset$  for every  $C_e$ , with high probability, there exists no  $C_e$  having  $2\sqrt{n}\log n + \omega(\sqrt{n})$  elements.  $\square$

Since  $|T_i| \sim \text{Binomial}(n, \frac{1}{\sqrt{n}})$ , with high probability  $|T_i| = O(\sqrt{n})$  and calling `NaivePlacement` on line 5 takes  $O(n^{1.5}kH\log n)$  time. It is easy to confirm that  $C_\emptyset = \emptyset$  and every call to `Place` takes as input a species tree topology of  $O(\sqrt{n}\log n)$  species with high probability. Thus, with high probability, each call to `Place` takes  $O(\sqrt{n}kH\log^2 n \log \log n)$  time and all  $O(n)$  calls to `Place` takes  $O(n^{1.5}kH\log^2 n \log \log n)$  time. Therefore, the time complexity of the DAC algorithm is  $O(n^{1.5}kH\log^2 n \log \log n) = O(n^{1.5+\epsilon}kH)$  with high probability.  $\square$
